# Supplementary material for: A Multi-Scale Bioinformatics Study on Novel Mechanism of Xintong Granule for Treating Coronary Heart Disease by Network Pharmacology and Molecular Docking Verification
Source: Research Square preprint supplement (doi:10.21203/rs.3.rs-116130/v1), 2020-12-01
Supplement: Supplementary file 1 [file 0599972cdfd0f32c2fd6ab2e.xlsx]

## Sheet: Table S7 
Supplementary Table 7 The information of KEGG pathway analysis of XTG-CHD PPI network
ID	Description	GeneRatio	BgRatio	pvalue	p.adjust	qvalue	geneID	Count
hsa04933	AGE-RAGE signaling pathway in diabetic complications	40/413	100/8049	3.35642e-26	1.01028e-23	3.63907e-24	3725/5599/207/5054/1278/7124/1906/1019/4790/7422/5970/7056/3553/3569/596/1027/1281/2152/6774/3576/6772/836/5595/27035/581/4846/7040/1432/4313/3383/3552/1277/7412/5578/6401/5292/5579/595/6347/5594	40
hsa05215	Prostate cancer	38/413	97/8049	1.53626e-24	2.31207e-22	8.32815e-23	1870/207/1956/572/3551/3630/7157/5328/1017/4790/1869/5925/5970/1147/1499/4318/5728/2064/596/1027/1385/3479/2932/4314/5595/367/2263/1950/3326/842/5894/4792/2950/6932/595/4193/5594/5327	38
hsa05418	Fluid shear stress and atherosclerosis	43/413	139/8049	7.47154e-23	7.49644e-21	2.70024e-21	3725/5599/207/7124/1906/3551/7157/4790/7422/5970/7056/1147/1499/3553/4318/596/4780/857/2353/7341/27035/5175/4846/1432/4313/3383/3326/3690/3552/7412/859/2944/6401/1728/3458/3791/653361/2950/2946/6347/3162/5327/7132	43
hsa05161	Hepatitis B	41/413	162/8049	2.98883e-18	2.2491e-16	8.10131e-17	3725/1870/5599/890/207/355/572/7124/3551/7157/1017/4790/841/1869/5925/5970/1147/4318/5111/3569/596/332/4609/8772/1385/6774/3576/2353/6772/836/5595/581/7040/1432/842/2002/5894/4792/5578/5579/5594	41
hsa04668	TNF signaling pathway	34/413	112/8049	5.54909e-18	3.34055e-16	1.20328e-16	3725/5599/207/355/7124/1906/3551/840/4790/841/5970/1147/3553/4318/3569/7133/8772/1385/2353/4314/836/5595/5743/3659/1432/3383/3627/7412/4792/6401/6347/5594/7132/153090	34
hsa04010	MAPK signaling pathway	55/413	294/8049	1.22687e-17	6.15478e-16	2.21697e-16	3725/5599/207/355/1956/7124/3551/3630/7157/4790/7422/5970/1147/782/3553/3643/783/2064/3481/781/408/374/4609/3479/2353/3315/2065/779/836/774/409/5595/2263/1950/776/785/784/7040/4233/1432/3552/5321/2002/5894/5921/5578/775/8074/5579/3791/5530/5594/7132/786/9693	55
hsa04657	IL-17 signaling pathway	30/413	94/8049	1.12757e-16	4.84854e-15	1.74646e-15	3725/5599/7124/3551/4790/841/5970/1147/3553/4318/3569/4312/8772/3576/2353/3565/2932/4314/836/3596/5595/5743/1432/3326/3627/4792/3458/4322/6347/5594	30
hsa05212	Pancreatic cancer	27/413	76/8049	1.81665e-16	6.83513e-15	2.46203e-15	1870/5599/207/1956/572/598/3551/1029/7157/1019/4790/1869/5925/7422/5970/1147/2064/6774/6772/5595/581/1950/7040/842/5894/595/5594	27
hsa05219	Bladder cancer	20/413	41/8049	1.01383e-15	3.01728e-14	1.08683e-14	1870/1956/1029/7157/1019/1869/5925/7422/4318/2064/4609/4312/3576/5595/1950/4313/5894/595/4193/5594	20
hsa05163	Human cytomegalovirus infection	45/413	225/8049	1.05181e-15	3.01728e-14	1.08683e-14	1870/207/355/1956/7124/3551/1029/7157/1019/4790/841/1869/5925/7422/5970/1147/1499/3553/3569/4609/8772/1385/6774/3576/2932/836/5595/581/5743/1432/3690/842/2002/5894/4792/5578/5579/5734/5530/595/6347/4193/5594/7132/5732	45
hsa05167	Kaposi sarcoma-associated herpesvirus infection	41/413	189/8049	1.10266e-15	3.01728e-14	1.08683e-14	3725/1870/5599/207/355/3551/7157/1019/4790/841/1869/5925/7422/5970/1147/1499/3569/4609/8772/1385/6774/3576/2353/2932/6772/836/5595/3091/581/5743/1432/3383/842/5894/4792/718/5530/595/5294/5594/7132	41
hsa05160	Hepatitis C	37/413	157/8049	1.76512e-15	4.42751e-14	1.5948e-14	1870/207/355/1956/572/7124/3551/7157/1019/1017/4790/841/1869/5925/5970/1147/1499/6256/3949/4609/8772/6774/5465/2932/6772/836/5595/581/1950/3627/842/5894/4792/3458/595/5594/7132	37
hsa01522	Endocrine resistance	29/413	98/8049	3.56619e-15	8.2571e-14	2.97423e-14	3725/1870/5599/207/1956/572/1029/7157/1019/1869/5925/4318/2099/2064/596/1027/3479/2353/5595/581/5469/1432/4313/2100/5894/2852/595/4193/5594	29
hsa04024	cAMP signaling pathway	43/413	216/8049	5.68642e-15	1.22258e-13	4.40377e-14	3725/5599/207/572/1906/4790/5970/5021/1385/5465/2353/1813/779/5595/776/1907/154/5894/3350/4792/775/153/3351/1909/134/3352/1129/1128/1816/1812/4878/5144/5139/476/2902/5594/135/6662/5020/493/1080/5732/10257	43
hsa04080	Neuroactive ligand-receptor interaction	55/413	341/8049	1.06962e-14	2.01502e-13	7.25817e-14	1906/5021/3952/1813/799/1268/1907/1269/154/2147/3350/152/2908/146/148/1136/147/140/718/4988/3356/155/153/796/3351/3358/1909/4986/134/3352/4543/151/150/5734/1129/3269/3357/1128/1816/1812/136/1131/2567/5644/4544/4160/2902/135/2554/5024/8001/5020/4985/1143/5732	55
hsa05223	Non-small cell lung cancer	24/413	68/8049	1.07111e-14	2.01502e-13	7.25817e-14	1870/207/1956/572/1029/7157/1019/1869/5925/6256/2064/6774/5595/581/1950/6258/6257/4233/842/5894/5578/5579/595/5594	24
hsa04066	HIF-1 signaling pathway	29/413	109/8049	7.7362e-14	1.36976e-12	4.93392e-13	207/5054/1956/1906/3630/4790/7422/5970/3569/3643/2064/596/1027/6774/3479/5595/3091/1950/4846/7018/5578/4843/5579/3458/4878/3162/5594/7076/3099	29
hsa05142	Chagas disease	28/413	102/8049	8.92436e-14	1.49235e-12	5.37549e-13	3725/5599/207/5054/355/7124/3551/4790/841/5970/1147/3553/3569/3586/8772/3576/2353/5595/7040/1432/4792/4843/3558/718/3458/6347/5594/7132	28
hsa05225	Hepatocellular carcinoma	36/413	168/8049	1.00361e-13	1.58993e-12	5.72696e-13	1870/207/1956/572/598/1029/7157/1019/1869/5925/1499/5728/3481/4780/4609/2932/5595/581/7040/4233/7015/2002/5894/2944/5578/54361/1728/5579/7296/2950/6932/7474/595/2946/3162/5594	36
hsa05205	Proteoglycans in cancer	40/413	205/8049	1.08091e-13	1.62677e-12	5.85966e-13	207/355/1278/1956/7124/7157/5328/7422/1499/4318/2099/2064/3481/4609/857/6774/3479/2065/836/5595/3091/7040/4233/1432/4313/3690/1277/2002/5894/859/5578/54361/5579/6469/3791/7474/595/4193/288/5594	40
hsa04151	PI3K-Akt signaling pathway	54/413	354/8049	2.06994e-13	2.96692e-12	1.06869e-12	207/894/1278/1956/572/598/3551/3630/7157/1019/1017/4790/7422/5970/1147/6256/3569/3643/5728/2064/3481/596/4170/672/1027/374/4609/1385/3479/3565/2932/2065/5595/2263/1950/4846/6696/4233/3326/3690/842/1277/5894/5578/3558/8074/9863/1129/1128/3791/595/4193/5294/5594	54
hsa05222	Small cell lung cancer	26/413	92/8049	3.32458e-13	4.54863e-12	1.63843e-12	1870/207/598/3551/7157/1019/1017/4790/1869/5925/5970/1147/6256/5728/596/1027/4609/836/581/5743/6258/6257/842/4792/4843/595	26
hsa01521	EGFR tyrosine kinase inhibitor resistance	24/413	79/8049	4.78524e-13	6.26242e-12	2.25574e-12	207/1956/572/598/7422/3084/3569/5728/2064/596/6774/3479/2932/2065/5595/581/2263/1950/4233/5894/5578/5579/3791/5594	24
hsa01524	Platinum drug resistance	23/413	73/8049	6.25091e-13	7.83968e-12	2.82387e-12	207/355/572/598/1029/7157/841/7153/2064/596/332/672/8772/836/5595/581/7155/842/2944/2950/2946/4193/5594	23
hsa04210	Apoptosis	31/413	136/8049	9.81425e-13	1.18164e-11	4.25628e-12	3725/5599/207/355/572/598/7124/3551/840/7157/4790/841/5970/1147/596/4170/332/8772/2353/836/5595/581/842/5894/4792/1509/9131/143/5594/7132/153090	31
hsa05145	Toxoplasmosis	28/413	112/8049	1.13579e-12	1.3149e-11	4.7363e-12	5599/207/572/598/7124/3551/4790/841/5970/1147/3586/3949/596/6774/6772/836/5595/7040/240/1432/842/4792/4843/3458/959/5294/5594/7132	28
hsa04020	Calcium signaling pathway	38/413	201/8049	1.30184e-12	1.45131e-11	5.22767e-12	1956/5021/2064/2065/779/774/4842/1950/776/4846/154/5578/4843/146/148/775/147/3356/155/153/5579/3358/1909/1129/3269/3357/1128/1816/1812/136/1131/5530/2902/135/6546/5024/6263/493	38
hsa05220	Chronic myeloid leukemia	23/413	76/8049	1.62551e-12	1.74742e-11	6.29425e-12	1870/207/572/598/3551/1029/7157/1019/4790/1869/5925/5970/1147/1027/4609/5595/581/7040/5894/4792/595/4193/5594	23
hsa05162	Measles	31/413	139/8049	1.82541e-12	1.89464e-11	6.82456e-12	3725/5599/207/355/894/572/598/3551/7157/1019/1017/4790/841/5970/1147/3553/3569/596/1027/8772/6774/2353/2932/6772/836/581/842/3552/4792/3558/595	31
hsa05166	Human T-cell leukemia virus 1 infection	39/413	219/8049	4.63164e-12	4.64708e-11	1.67389e-11	3725/1870/5599/890/207/894/598/7124/3551/1029/7157/1019/1017/4790/1869/5925/5970/1147/1111/3569/5728/4609/1385/2353/5595/581/7040/7015/3383/2002/4792/3558/2224/4316/5530/595/5594/7132/5423	39
hsa04926	Relaxin signaling pathway	29/413	129/8049	7.88274e-12	7.65388e-11	2.75695e-11	3725/5599/207/1278/1956/1906/4790/7422/5970/4318/1281/408/4312/1385/2353/409/5595/4842/4846/7040/1432/4313/1277/5894/4792/5578/4843/4322/5594	29
hsa04068	FoxO signaling pathway	29/413	131/8049	1.18459e-11	1.09423e-10	3.94144e-11	5599/207/894/1956/3551/3630/1017/891/1147/3569/3643/3586/5728/1027/6774/3479/847/5595/1950/7040/1432/6517/5894/595/4193/5564/5594/23411/9455	29
hsa04022	cGMP-PKG signaling pathway	33/413	167/8049	1.19965e-11	1.09423e-10	3.94144e-11	207/572/3630/3643/1385/779/5595/776/4846/154/5894/152/146/148/775/147/140/155/153/1909/134/151/150/5530/4878/5139/3778/476/5294/5594/6546/4985/493	33
hsa05226	Gastric cancer	31/413	149/8049	1.27021e-11	1.12451e-10	4.05052e-11	1870/207/1956/7157/1017/1869/5925/1499/6256/2064/596/1027/4609/2932/5595/581/2263/1950/6258/6257/7040/4233/7015/5894/54361/8074/6469/6932/7474/595/5594	31
hsa04726	Serotonergic synapse	27/413	115/8049	1.43977e-11	1.2382e-10	4.46005e-11	351/779/836/774/5595/776/5743/240/5321/5742/5894/3350/5578/775/3356/4129/5579/3351/4128/3358/3352/3359/3357/6532/5594/3751/7166	27
hsa04659	Th17 cell differentiation	26/413	107/8049	1.50473e-11	1.25812e-10	4.53178e-11	3725/5599/3551/4790/5970/1147/3553/6256/3569/6774/2353/3565/6772/5595/3091/6258/6257/7040/1432/3326/4792/3558/3458/5530/196/5594	26
hsa05140	Leishmaniasis	22/413	77/8049	1.80714e-11	1.47013e-10	5.29545e-11	3725/7124/4790/5970/3553/3586/2353/3565/6772/5595/5743/7040/1432/3552/2002/4792/4843/718/5579/3458/653361/5594	22
hsa05210	Colorectal cancer	23/413	86/8049	2.79358e-11	2.21281e-10	7.97062e-11	3725/5599/207/1956/572/7157/1499/596/332/374/4609/2353/2932/836/5595/581/1950/7040/842/5894/6932/595/5594	23
hsa04218	Cellular senescence	31/413	156/8049	4.44187e-11	3.42821e-10	1.23485e-10	1870/890/207/5054/894/1029/7157/1019/1017/4790/1869/5925/5970/891/3486/1111/3569/5728/4609/3576/5595/776/7040/1432/3552/5894/5530/595/4193/5594/23411	31
hsa05224	Breast cancer	30/413	147/8049	4.5948e-11	3.45759e-10	1.24543e-10	3725/1870/207/1956/7157/1019/1869/5925/8648/1499/2099/5728/2064/672/4609/3479/2353/2932/5595/581/1950/2100/5894/54361/5241/8074/6932/7474/595/5594	30
hsa04932	Non-alcoholic fatty liver disease	30/413	150/8049	7.81804e-11	5.73959e-10	2.06742e-10	3725/5599/207/355/7124/3551/840/3630/4790/841/5970/3553/6256/3569/3643/9370/5465/3576/3952/2353/2932/836/581/7040/1571/3552/6720/5564/7132/2931	30
hsa01523	Antifolate resistance	14/413	31/8049	8.40546e-11	6.02392e-10	2.16983e-10	1719/7124/3551/4790/5970/1147/3553/3569/6470/4363/8836/7298/9429/10257	14
hsa05164	Influenza A	32/413	171/8049	1.11323e-10	7.79259e-10	2.80691e-10	207/355/7124/3551/1019/4790/841/5970/1147/3553/3569/8772/3576/6772/836/5595/581/3383/3627/842/3552/5894/4792/5578/5371/2224/5579/3458/5644/6347/5594/7132	32
hsa04920	Adipocytokine signaling pathway	20/413	69/8049	1.1445e-10	7.82939e-10	2.82017e-10	5599/207/7124/3551/4790/5970/1147/6256/7133/9370/6774/5465/3952/6258/6257/6517/4792/948/5564/7132	20
hsa05169	Epstein-Barr virus infection	35/413	202/8049	1.3567e-10	9.07479e-10	3.26877e-10	3725/1870/5599/890/207/355/894/7124/3551/7157/1019/1017/4790/841/1869/5925/5970/1147/3569/596/1027/4609/8772/6774/6772/836/581/1432/3383/3627/842/4792/22938/595/4193	35
hsa04917	Prolactin signaling pathway	20/413	70/8049	1.52762e-10	9.99596e-10	3.60057e-10	5599/207/894/3630/4790/5970/2099/6774/2353/2932/6772/5595/3659/1432/1586/2100/5894/7054/595/5594	20
hsa05218	Melanoma	20/413	72/8049	2.67659e-10	1.71415e-09	6.17443e-10	1870/207/1956/572/1029/7157/1019/1869/5925/5728/3479/5595/581/1950/4233/5894/8074/595/4193/5594	20
hsa05213	Endometrial cancer	18/413	58/8049	2.84124e-10	1.75465e-09	6.32032e-10	207/1956/572/7157/1499/5728/2064/4609/2932/5595/581/1950/842/2002/5894/6932/595/5594	18
hsa04919	Thyroid hormone signaling pathway	26/413	121/8049	2.85641e-10	1.75465e-09	6.32032e-10	10499/207/572/7157/8648/1499/6256/2099/4609/2932/6772/5595/3091/6258/6257/5469/3690/842/5894/5578/54361/5579/595/4193/476/5594	26
hsa04115	p53 signaling pathway	20/413	73/8049	3.51482e-10	2.11592e-09	7.62161e-10	5054/355/894/598/1029/7157/1019/1017/841/891/3486/1111/5728/596/3479/836/581/842/595/4193	20
hsa04931	Insulin resistance	24/413	108/8049	6.79593e-10	4.01093e-09	1.44475e-09	5599/207/7124/3551/3630/4790/5970/5770/3569/3643/5728/1385/6774/5465/2932/4846/6517/4792/6720/948/5579/5564/7132/5837	24
hsa04921	Oxytocin signaling pathway	29/413	154/8049	7.36731e-10	4.26454e-09	1.5361e-09	3725/1956/782/5021/783/781/2353/779/5595/776/5743/4846/785/784/5321/2002/5894/5578/775/5579/5530/4878/595/5564/5294/5594/6263/5020/786	29
hsa05133	Pertussis	20/413	76/8049	7.7249e-10	4.38716e-09	1.58027e-09	3725/5599/7124/840/4790/5970/3553/3569/3586/3576/2353/836/5595/3659/1432/3552/4843/718/715/5594	20
hsa04380	Osteoclast differentiation	26/413	128/8049	1.04667e-09	5.83422e-09	2.1015e-09	3725/5599/207/7124/3551/4790/5970/1147/3553/1385/2353/6772/5595/799/27035/7040/1432/5468/3690/3552/4792/3458/653361/5530/5594/7132	26
hsa05165	Human papillomavirus infection	45/413	331/8049	1.22896e-09	6.72578e-09	2.42265e-09	890/207/355/894/1278/1956/572/7124/3551/7157/1019/1017/4790/841/1869/5925/7422/5970/1147/1499/5728/1027/8772/1385/2932/6772/836/5595/581/1950/5743/3659/6696/7015/3690/1277/5894/54361/5734/6932/7474/595/4193/5594/7132	45
hsa05144	Malaria	16/413	50/8049	1.70503e-09	9.07877e-09	3.2702e-09	7124/3553/3569/3586/3576/5175/7040/4233/3383/7412/6401/948/3458/959/6403/6347	16
hsa04625	C-type lectin receptor signaling pathway	23/413	104/8049	1.71924e-09	9.07877e-09	3.2702e-09	3725/5599/207/7124/3551/4790/841/5970/1147/3553/3569/3586/6772/5595/5743/3659/1432/5894/4792/3558/5530/4193/5594	23
hsa05152	Tuberculosis	31/413	180/8049	1.88088e-09	9.76112e-09	3.51598e-09	5599/207/572/7124/4790/841/5970/3553/3569/3586/596/8772/1385/6772/836/7421/5595/581/7040/1432/842/3552/5894/4843/718/3458/1594/5530/1509/5594/7132	31
hsa04928	Parathyroid hormone synthesis, secretion and action	23/413	106/8049	2.55538e-09	1.30367e-08	4.69587e-09	1956/9365/6256/596/408/1385/2353/7421/409/5595/6258/6257/860/5894/5578/8074/5579/1594/4322/5144/6569/5594/1591	23
hsa05221	Acute myeloid leukemia	18/413	67/8049	3.85124e-09	1.93204e-08	6.95925e-09	890/207/572/3551/4790/5970/1147/4609/6774/5595/5894/5371/5292/4353/5467/6932/595/5594	18
hsa04930	Type II diabetes mellitus	15/413	46/8049	4.13704e-09	2.0139e-08	7.25412e-09	5599/7124/3551/3630/3767/3643/9370/774/5595/776/6517/775/5594/6833/3099	15
hsa05214	Glioma	19/413	75/8049	4.14823e-09	2.0139e-08	7.25412e-09	1870/207/1956/1029/7157/1019/1869/5925/5728/3479/5595/581/1950/5894/5578/5579/595/4193/5594	19
hsa04261	Adrenergic signaling in cardiomyocytes	27/413	149/8049	6.94756e-09	3.31939e-08	1.19565e-08	207/782/783/781/596/1385/779/5595/6331/776/785/784/1432/154/5578/146/148/775/147/153/476/5294/5594/6546/786/3784/493	27
hsa04620	Toll-like receptor signaling pathway	22/413	104/8049	9.43165e-09	4.36758e-08	1.57322e-08	3725/5599/207/7124/3551/4790/841/5970/1147/3553/3569/8772/3576/2353/6772/6373/5595/6696/1432/3627/4792/5594	22
hsa04660	T cell receptor signaling pathway	22/413	104/8049	9.43165e-09	4.36758e-08	1.57322e-08	3725/5599/207/7124/3551/1019/4790/5970/1147/3586/2353/3565/2932/5595/1432/5894/4792/3558/3458/959/5530/5594	22
hsa05235	PD-L1 expression and PD-1 checkpoint pathway in cancer	20/413	89/8049	1.51136e-08	6.89274e-08	2.48278e-08	3725/207/1956/3551/4790/5970/1147/5728/6774/2353/6772/5595/3091/1950/1432/5894/4792/3458/5530/5594	20
hsa04370	VEGF signaling pathway	16/413	59/8049	2.47763e-08	1.11308e-07	4.00936e-08	207/572/7422/3315/5595/5743/4846/1432/842/5321/5894/5578/5579/3791/5530/5594	16
hsa04071	Sphingolipid signaling pathway	23/413	119/8049	2.65748e-08	1.17633e-07	4.23716e-08	5599/207/7124/7157/4790/5970/5728/596/5595/581/4846/1432/5894/5578/140/5579/4363/134/2205/1509/5594/7132/4985	23
hsa04012	ErbB signaling pathway	19/413	85/8049	3.81985e-08	1.66634e-07	6.0022e-08	3725/5599/207/1956/572/3084/2064/1027/374/4609/2932/2065/5595/1950/2002/5894/5578/5579/5594	19
hsa04924	Renin secretion	17/413	69/8049	4.32533e-08	1.85989e-07	6.69938e-08	1906/1385/779/776/1907/154/775/155/153/1909/134/5734/5530/4878/5139/3778/5732	17
hsa05206	MicroRNAs in cancer	40/413	310/8049	4.84768e-08	2.05514e-07	7.40269e-08	1870/894/1956/3551/1029/7157/995/5328/4790/1869/7422/4318/5728/2064/1786/596/4170/672/1027/4609/6774/2065/836/5595/5743/4233/3690/5894/5578/1545/5292/5579/4363/1788/595/4193/3162/5594/23411/1591	40
hsa00350	Tyrosine metabolism	12/413	35/8049	8.08006e-08	3.37792e-07	1.21673e-07	125/126/7054/4129/4128/7173/2805/259307/131/7306/124/7299	12
hsa00380	Tryptophan metabolism	13/413	42/8049	9.25043e-08	3.81422e-07	1.37389e-07	1543/847/501/217/1545/1544/4129/4128/219/259307/1738/2639/7166	13
hsa05170	Human immunodeficiency virus 1 infection	31/413	212/8049	1.00829e-07	4.10131e-07	1.4773e-07	3725/5599/207/355/572/598/7124/3551/995/4790/841/5970/891/1147/1111/596/7133/8772/2353/836/5595/581/1432/842/5894/4792/5578/5579/5530/5594/7132	31
hsa05143	African trypanosomiasis	12/413	37/8049	1.63307e-07	6.46782e-07	2.32973e-07	355/7124/3553/3569/3586/3383/7412/5578/6401/5579/3458/4878	12
hsa05216	Thyroid cancer	12/413	37/8049	1.63307e-07	6.46782e-07	2.32973e-07	7157/1499/6256/4609/5595/581/6258/6257/5468/6932/595/5594	12
hsa04728	Dopaminergic synapse	23/413	132/8049	1.96803e-07	7.69321e-07	2.77112e-07	5599/207/408/1385/2353/1813/2932/774/409/776/1432/7054/6323/5578/775/6531/4129/5579/4128/1816/1812/5530/2931	23
hsa05031	Amphetamine addiction	16/413	69/8049	2.68811e-07	1.03733e-06	3.73651e-07	3725/1385/2353/776/7054/5578/775/6531/4129/5579/4128/1812/5530/2902/6804/23411	16
hsa04215	Apoptosis - multiple species	11/413	32/8049	2.75826e-07	1.05093e-06	3.78548e-07	5599/598/840/841/596/332/8772/836/581/842/7132	11
hsa05010	Alzheimer disease	43/413	369/8049	2.85977e-07	1.07599e-06	3.87574e-07	5599/207/355/572/7124/3551/840/3630/4790/841/5970/1147/1499/3553/3569/3643/348/351/8772/2932/779/836/5595/27035/4842/776/5743/6868/842/3552/5894/54361/4843/775/1128/1131/5530/7474/2902/5594/6263/7132/81027	43
hsa04510	Focal adhesion	29/413	201/8049	3.53426e-07	1.31335e-06	4.73072e-07	3725/5599/207/894/1278/1956/572/7422/1499/5728/2064/596/857/3479/2932/5595/1950/6696/4233/3690/1277/2002/5894/859/5578/5579/3791/595/5594	29
hsa05202	Transcriptional misregulation in cancer	28/413	192/8049	4.51979e-07	1.65909e-06	5.9761e-07	890/894/598/7157/5328/4790/5970/3486/6256/4318/3569/1027/4609/3576/3479/4314/581/6258/6257/4233/5468/860/5371/4353/4193/5081/5327/5079	28
hsa04929	GnRH secretion	15/413	64/8049	5.49734e-07	1.99361e-06	7.18105e-07	207/3767/408/779/409/5595/776/6696/2100/5894/5578/775/5579/2852/5594	15
hsa05321	Inflammatory bowel disease	15/413	65/8049	6.8163e-07	2.44251e-06	8.79799e-07	3725/7124/4790/5970/3553/3569/3586/6774/3565/6772/3596/7040/3552/3558/3458	15
hsa04725	Cholinergic synapse	20/413	113/8049	9.62408e-07	3.40806e-06	1.22759e-06	207/596/1385/2353/779/774/5595/776/5578/1136/775/5579/1129/1128/43/1131/5294/5594/3784/1143	20
hsa04934	Cushing syndrome	24/413	155/8049	1.01831e-06	3.56408e-06	1.28379e-06	1870/1956/1029/1019/1017/1869/5925/1499/3949/1027/1385/2932/779/5595/776/1586/54361/775/6932/7474/595/3776/196/5594	24
hsa04913	Ovarian steroidogenesis	13/413	51/8049	1.13025e-06	3.91041e-06	1.40854e-06	3630/3643/1543/3949/3479/3292/5743/240/8644/1586/5321/1588/1545	13
hsa05132	Salmonella infection	29/413	213/8049	1.21363e-06	4.15117e-06	1.49526e-06	3725/5599/207/7124/3551/840/4790/841/5970/1147/1499/3553/3569/596/4609/8772/3576/2353/836/5595/581/1432/3326/5894/4792/6932/5294/5594/7132	29
hsa05410	Hypertrophic cardiomyopathy	17/413	90/8049	2.49911e-06	8.45205e-06	3.04445e-06	7124/1906/782/3569/783/781/3479/779/776/785/784/7040/3690/775/5564/6546/786	17
hsa04152	AMPK signaling pathway	20/413	120/8049	2.56237e-06	8.5697e-06	3.08683e-06	890/207/3630/3643/31/9370/1385/3952/3479/5468/6517/148/6720/948/2194/595/3156/5564/23411/1080	20
hsa04658	Th1 and Th2 cell differentiation	17/413	92/8049	3.42857e-06	1.13406e-05	4.08493e-06	3725/5599/3551/4790/5970/1147/2353/3565/6772/3596/5595/1432/4792/3558/3458/5530/5594	17
hsa04110	Cell cycle	20/413	124/8049	4.32111e-06	1.41376e-05	5.09239e-06	1870/890/894/1029/7157/995/1019/1017/1869/5925/891/1111/5111/1027/4609/5591/2932/7040/595/4193	20
hsa05134	Legionellosis	13/413	57/8049	4.3826e-06	1.41845e-05	5.10931e-06	7124/840/4790/841/5970/3553/3569/3576/836/3297/842/4792/718	13
hsa05030	Cocaine addiction	12/413	49/8049	4.63561e-06	1.48438e-05	5.34678e-06	3725/4790/5970/1742/1385/1813/7054/6531/4129/4128/1812/2902	12
hsa00330	Arginine and proline metabolism	12/413	50/8049	5.82074e-06	1.84425e-05	6.64306e-06	4842/4846/501/217/4843/4129/4128/2628/219/2805/1610/4953	12
hsa04915	Estrogen signaling pathway	21/413	138/8049	6.44171e-06	2.01974e-05	7.27518e-06	3725/10499/207/1956/8648/4318/2099/596/1385/2353/5595/4846/4313/3326/2100/5894/5241/4988/2852/1509/5594	21
hsa05135	Yersinia infection	20/413	130/8049	9.04179e-06	2.80575e-05	1.01064e-05	3725/5599/207/7124/3551/4790/5970/1147/3553/3569/3586/3576/2353/2932/5595/1432/4792/3558/6347/5594	20
hsa05230	Central carbon metabolism in cancer	14/413	70/8049	9.70846e-06	2.98188e-05	1.07408e-05	207/1956/7157/5728/2064/4609/5595/3091/2263/4233/5894/2539/5594/3099	14
hsa05146	Amoebiasis	17/413	102/8049	1.45271e-05	4.41681e-05	1.59095e-05	1278/7124/4790/5970/3553/3569/3586/1281/3576/3315/836/7040/1277/5578/4843/5579/3458	17
hsa05203	Viral carcinogenesis	26/413	204/8049	1.4706e-05	4.42652e-05	1.59444e-05	3725/890/894/572/1029/7157/1019/1017/4790/841/5925/5970/1111/1027/1385/6774/836/5595/581/4792/718/22938/595/4193/5594/5423	26
hsa04270	Vascular smooth muscle contraction	20/413	135/8049	1.61004e-05	4.7849e-05	1.72353e-05	1906/779/5595/776/1907/5321/5894/5578/146/148/775/147/796/5579/1909/136/4878/3778/5594/135	20
hsa05130	Pathogenic Escherichia coli infection	25/413	193/8049	1.62146e-05	4.7849e-05	1.72353e-05	3725/5599/355/7124/3551/840/4790/841/5970/1147/3553/3569/8772/3576/2353/836/5595/581/1432/842/2147/4792/5594/7132/81027	25
hsa04064	NF-kappa B signaling pathway	17/413	104/8049	1.89182e-05	5.52852e-05	1.99139e-05	598/7124/3551/5328/4790/5970/1147/3553/596/3576/5743/3383/7412/4792/5579/959/7132	17
hsa04014	Ras signaling pathway	28/413	232/8049	1.94024e-05	5.61549e-05	2.02272e-05	5599/207/1956/572/598/3551/3630/4790/7422/5970/1147/3643/3481/3479/5595/2263/1950/4233/5321/2002/5894/5921/5578/8074/5579/3791/2902/5594	28
hsa04015	Rap1 signaling pathway	26/413	210/8049	2.46554e-05	7.06789e-05	2.54587e-05	207/1956/3630/7422/1499/3643/3479/1813/5595/2263/1950/1268/4233/1432/3690/5894/5578/8074/9863/5579/3791/136/2902/5594/135/9693	26
hsa03320	PPAR signaling pathway	14/413	77/8049	3.0358e-05	8.53997e-05	3.07612e-05	6256/336/9370/4312/5465/6258/6257/5468/948/4973/5467/34/1593/9415	14
hsa05412	Arrhythmogenic right ventricular cardiomyopathy	14/413	77/8049	3.0358e-05	8.53997e-05	3.07612e-05	782/1499/783/781/779/776/785/784/3690/775/2697/6932/6546/786	14
hsa04935	Growth hormone synthesis, secretion and action	18/413	119/8049	3.20634e-05	8.93618e-05	3.21884e-05	5599/207/3486/1385/6774/3479/2353/2932/6772/779/5595/776/1432/5894/5578/775/5579/5594	18
hsa04062	Chemokine signaling pathway	24/413	189/8049	3.33841e-05	9.17157e-05	3.30363e-05	207/572/3551/4790/5970/1147/408/6774/3576/2932/6772/6373/409/5595/3627/5894/4792/5579/1236/653361/6347/5294/5594/2931	24
hsa04664	Fc epsilon RI signaling pathway	13/413	68/8049	3.35174e-05	9.17157e-05	3.30363e-05	5599/207/7124/3565/3596/5595/240/1432/5321/5894/5578/2205/5594	13
hsa04979	Cholesterol metabolism	11/413	50/8049	3.45381e-05	9.36573e-05	3.37356e-05	336/3949/348/338/948/19/8435/6646/350/1071/1593	11
hsa04540	Gap junction	15/413	88/8049	3.52019e-05	9.4605e-05	3.4077e-05	1956/1813/5595/1950/5894/5578/3356/153/5579/3358/2697/3357/1812/5594/81027	15
hsa04211	Longevity regulating pathway	15/413	89/8049	4.03883e-05	0.000107583	3.87517e-05	207/9365/3630/7157/4790/5970/3643/9370/1385/3479/847/581/5468/5564/23411	15
hsa05120	Epithelial cell signaling in Helicobacter pylori infection	13/413	70/8049	4.61819e-05	0.000121936	4.39219e-05	3725/5599/1956/3551/4790/5970/1147/3576/836/6868/4233/1432/4792	13
hsa00140	Steroid hormone biosynthesis	12/413	61/8049	4.99708e-05	0.000130793	4.7112e-05	1543/3292/54658/1571/8644/1586/1588/1576/1545/1544/6715/6783	12
hsa00982	Drug metabolism - cytochrome P450	13/413	71/8049	5.39472e-05	0.000139984	5.04225e-05	125/54658/1571/126/1576/2944/1544/4129/4128/2950/131/2946/124	13
hsa00071	Fatty acid degradation	10/413	44/8049	5.84021e-05	0.000150248	5.41198e-05	125/501/126/217/34/35/219/131/124/2639	10
hsa04662	B cell receptor signaling pathway	14/413	82/8049	6.2825e-05	0.00015891	5.72399e-05	3725/207/3551/4790/5970/1147/2353/2932/5595/5894/4792/5579/5530/5594	14
hsa05204	Chemical carcinogenesis	14/413	82/8049	6.2825e-05	0.00015891	5.72399e-05	1543/125/5743/54658/1571/126/1576/2944/1545/1544/2950/131/2946/124	14
hsa04910	Insulin signaling pathway	19/413	137/8049	6.65739e-05	0.00016699	6.01501e-05	5599/207/572/3551/3630/5770/3643/31/2932/5595/6517/2002/5894/6720/2194/5564/5594/3099/5837	19
hsa04912	GnRH signaling pathway	15/413	93/8049	6.84724e-05	0.000168936	6.08512e-05	3725/5599/1956/779/5595/776/1432/4313/5321/2002/5894/5578/775/5579/5594	15
hsa04970	Salivary secretion	15/413	93/8049	6.84724e-05	0.000168936	6.08512e-05	4842/154/5578/146/148/147/4069/155/153/5579/1131/3778/476/6263/493	15
hsa04960	Aldosterone-regulated sodium reabsorption	9/413	37/8049	7.77815e-05	0.000190343	6.85622e-05	3630/3643/3479/5595/5578/5579/4306/476/5594	9
hsa05414	Dilated cardiomyopathy	15/413	96/8049	9.95635e-05	0.000241682	8.70547e-05	7124/782/783/781/3479/779/776/785/784/7040/3690/775/153/6546/786	15
hsa04923	Regulation of lipolysis in adipocytes	11/413	56/8049	0.000104232	0.00025099	9.04071e-05	207/3630/3643/5743/5742/154/155/153/134/4878/11343	11
hsa00980	Metabolism of xenobiotics by cytochrome P450	13/413	76/8049	0.000112221	0.000268084	9.65645e-05	1543/125/54658/1571/126/1576/2944/1545/1544/2950/131/2946/124	13
hsa00260	Glycine, serine and threonine metabolism	9/413	40/8049	0.00014906	0.000350524	0.00012626	6470/501/4129/4128/2628/55349/1610/1738/29958	9
hsa05020	Prion diseases	9/413	40/8049	0.00014906	0.000350524	0.00012626	3553/3569/6647/5595/581/3552/2002/3309/5594	9
hsa04622	RIG-I-like receptor signaling pathway	12/413	70/8049	0.000200693	0.000468284	0.000168677	5599/7124/3551/4790/841/5970/1147/8772/3576/1432/3627/4792	12
hsa04630	JAK-STAT signaling pathway	20/413	162/8049	0.000221362	0.000512539	0.000184618	207/894/1956/598/3569/3586/596/4170/4609/6774/3952/3565/6772/3596/1950/5894/3558/5292/3458/595	20
hsa05323	Rheumatoid arthritis	14/413	93/8049	0.000252991	0.000581299	0.000209386	3725/7124/7422/3553/3569/4312/3576/2353/4314/7040/3383/3552/3458/6347	14
hsa04722	Neurotrophin signaling pathway	16/413	119/8049	0.000355702	0.000811108	0.000292163	3725/5599/207/572/3551/7157/4790/5970/596/2932/5595/581/1432/5894/4792/5594	16
hsa04621	NOD-like receptor signaling pathway	21/413	181/8049	0.000368617	0.000834238	0.000300495	3725/5599/598/7124/3551/4790/841/5970/1147/3553/3569/596/8772/3576/6772/5595/1432/3326/4792/6347/5594	21
hsa04911	Insulin secretion	13/413	86/8049	0.000400952	0.000900646	0.000324415	3630/3767/1385/779/776/5578/775/5579/1131/3778/476/6804/6833	13
hsa05231	Choline metabolism in cancer	14/413	98/8049	0.000440375	0.000981873	0.000353673	3725/5599/207/1956/2353/5595/3091/1950/5321/5894/5578/5579/5594/1119	14
hsa04914	Progesterone-mediated oocyte maturation	14/413	99/8049	0.000489467	0.0010833	0.000390209	5599/890/207/3630/995/1017/891/3479/5595/1432/3326/5894/5241/5594	14
hsa04750	Inflammatory mediator regulation of TRP channels	14/413	100/8049	0.000543143	0.00119333	0.00042984	5599/3553/3479/1432/5321/5578/3356/5579/3358/5734/3269/3357/8989/5732	14
hsa04916	Melanogenesis	14/413	101/8049	0.000601743	0.0013125	0.000472765	1906/1499/1385/2932/5595/5894/5578/54361/5579/6932/7474/7306/5594/7299	14
hsa00830	Retinol metabolism	11/413	68/8049	0.000616182	0.00133432	0.000480626	1543/125/54658/126/1576/1544/9249/54884/131/8854/124	11
hsa05131	Shigellosis	25/413	242/8049	0.000630003	0.00135451	0.000487897	3725/5599/207/1956/598/7124/3551/7157/4790/5970/1147/3553/596/3576/2932/5595/581/1432/4792/718/4193/5594/7132/2931/3099	25
hsa00280	Valine, leucine and isoleucine degradation	9/413	48/8049	0.000634937	0.00135543	0.00048823	501/217/34/3712/35/219/27034/259307/1738	9
hsa00340	Histidine metabolism	6/413	22/8049	0.000650093	0.00137801	0.000496364	501/217/4129/4128/219/443	6
hsa04520	Adherens junction	11/413	71/8049	0.000896232	0.00188647	0.000679513	1956/5770/1499/3643/2064/5595/6591/4233/6932/6615/5594	11
hsa00360	Phenylalanine metabolism	5/413	16/8049	0.000946783	0.00197904	0.000712856	4129/5053/4128/2805/259307	5
hsa04713	Circadian entrainment	13/413	97/8049	0.00128675	0.00267111	0.000962142	1385/2353/5595/4842/776/5578/775/5579/4543/4544/2902/5594/6263	13
hsa04961	Endocrine and other factor-regulated calcium reabsorption	9/413	53/8049	0.00133698	0.00275637	0.000992852	9365/2099/7421/5578/5579/26052/476/6546/493	9
hsa00790	Folate biosynthesis	6/413	26/8049	0.00168478	0.0034498	0.00124263	1719/8644/7054/5053/8836/7166	6
hsa00983	Drug metabolism - other enzymes	11/413	79/8049	0.00218933	0.00445263	0.00160385	54658/1571/1576/2944/1066/1806/7498/4353/2950/2946/3615	11
hsa05032	Morphine addiction	12/413	91/8049	0.00224918	0.00454364	0.00163663	408/774/409/5578/4988/5579/134/1812/2567/5144/5139/2554	12
hsa04150	mTOR signaling pathway	17/413	155/8049	0.00241597	0.00484804	0.00174628	207/7124/3551/3630/1147/3643/5728/3479/2932/5595/5894/5578/54361/5579/7474/5594/7132	17
hsa05211	Renal cell carcinoma	10/413	69/8049	0.00254336	0.00506989	0.00182619	3725/207/572/7422/5595/3091/7040/4233/5894/5594	10
hsa05330	Allograft rejection	7/413	38/8049	0.00281586	0.00557614	0.00200854	355/7124/3586/3565/3558/3458/959	7
hsa00100	Steroid biosynthesis	5/413	20/8049	0.00283506	0.00557747	0.00200902	120227/1594/8435/6646/1591	5
hsa04217	Necroptosis	17/413	159/8049	0.00316206	0.00618038	0.00222619	5599/355/7124/841/3553/596/8772/6774/6772/581/3326/3552/5321/3458/9131/7132/5837	17
hsa00770	Pantothenate and CoA biosynthesis	5/413	21/8049	0.00356666	0.00692622	0.00249485	217/1806/5167/219/5169	5
hsa04371	Apelin signaling pathway	15/413	137/8049	0.00432848	0.00831414	0.00299478	207/5054/5595/4842/4846/6696/5894/4843/595/5564/5294/5594/6546/6263/5327	15
hsa05310	Asthma	6/413	31/8049	0.00433661	0.00831414	0.00299478	7124/3586/3565/3596/959/2205	6
hsa00590	Arachidonic acid metabolism	9/413	63/8049	0.00454325	0.00865518	0.00311762	5743/240/1571/8644/5321/5742/9536/4048/151056	9
hsa04260	Cardiac muscle contraction	11/413	87/8049	0.00470209	0.00890145	0.00320633	782/783/781/779/776/785/784/775/476/6546/786	11
hsa05332	Graft-versus-host disease	7/413	42/8049	0.00504635	0.00949344	0.00341957	355/7124/3553/3569/3552/3558/3458	7
hsa04971	Gastric acid secretion	10/413	76/8049	0.00519233	0.00970739	0.00349663	9992/5578/5579/1131/476/3776/760/3784/1080/54207	10
hsa04940	Type I diabetes mellitus	7/413	43/8049	0.00576821	0.0107175	0.00386047	355/7124/3630/3553/3552/3558/3458	7
hsa04976	Bile secretion	11/413	90/8049	0.00609025	0.0112464	0.00405099	6256/3949/9971/54658/1576/3156/476/760/1080/9429/10257	11
hsa04977	Vitamin digestion and absorption	5/413	24/8049	0.00656304	0.0120456	0.00433885	8029/338/25974/4363/151056	5
hsa00010	Glycolysis / Gluconeogenesis	9/413	67/8049	0.00685531	0.0125057	0.00450461	125/501/126/217/219/131/124/1738/3099	9
hsa02010	ABC transporters	7/413	45/8049	0.00743994	0.0134905	0.00485931	4363/19/9619/6833/1080/9429/10257	7
hsa04310	Wnt signaling pathway	16/413	160/8049	0.00785839	0.0141639	0.00510189	3725/5599/894/7157/1499/4609/2932/5578/54361/5579/5467/6932/4316/5530/7474/595	16
hsa04072	Phospholipase D signaling pathway	15/413	148/8049	0.00878539	0.0156474	0.00563622	207/1956/3630/3643/3576/5595/1950/5321/5894/2147/5578/26052/2205/5294/5594	15
hsa04723	Retrograde endocannabinoid signaling	15/413	148/8049	0.00878539	0.0156474	0.00563622	5599/779/774/5595/1268/776/5743/1432/5578/775/5579/2567/5594/2554/11343	15
hsa04611	Platelet activation	13/413	124/8049	0.0108651	0.0192377	0.00692947	207/1278/1281/5595/4846/1432/3690/5321/1277/5742/2147/5294/5594	13
hsa04730	Long-term depression	8/413	60/8049	0.0110231	0.0194033	0.00698911	3479/5595/4842/5321/5894/5578/5579/5594	8
hsa04610	Complement and coagulation cascades	10/413	85/8049	0.011323	0.0198152	0.0071375	2155/5054/5328/7056/2152/2159/2147/718/715/5327	10
hsa04061	Viral protein interaction with cytokine and cytokine receptor	11/413	100/8049	0.0131451	0.0227593	0.00819798	7124/3569/3586/7133/3576/6373/3627/3558/1236/6347/7132	11
hsa04340	Hedgehog signaling pathway	7/413	50/8049	0.0131566	0.0227593	0.00819798	894/596/408/2932/409/6469/595	7
hsa04213	Longevity regulating pathway - multiple species	8/413	62/8049	0.0133316	0.0229304	0.0082596	207/3630/3643/6647/3479/847/5564/23411	8
hsa04623	Cytosolic DNA-sensing pathway	8/413	63/8049	0.0146099	0.0248452	0.0089493	3551/4790/5970/1147/3553/3569/3627/4792	8
hsa05217	Basal cell carcinoma	8/413	63/8049	0.0146099	0.0248452	0.0089493	7157/1499/2932/581/54361/6469/6932/7474	8
hsa04550	Signaling pathways regulating pluripotency of stem cells	14/413	143/8049	0.0148173	0.0249938	0.00900285	207/1499/4609/6774/3479/2932/5595/2263/1432/5894/54361/6932/7474/5594	14
hsa00591	Linoleic acid metabolism	5/413	29/8049	0.0148634	0.0249938	0.00900285	1571/5321/1576/1544/151056	5
hsa04972	Pancreatic secretion	11/413	102/8049	0.015099	0.0252489	0.00909473	5578/5579/1131/1504/5644/3778/476/760/3784/493/1080	11
hsa00410	beta-Alanine metabolism	5/413	30/8049	0.0171057	0.0284465	0.0102465	501/217/1806/35/219	5
hsa00220	Arginine biosynthesis	4/413	21/8049	0.0204041	0.0337453	0.0121552	4842/4846/4843/2805	4
hsa04720	Long-term potentiation	8/413	67/8049	0.0206219	0.0339191	0.0122178	5595/5894/5578/775/5579/5530/2902/5594	8
hsa03410	Base excision repair	5/413	33/8049	0.0251398	0.0411254	0.0148135	5424/5111/5426/143/5423	5
hsa04925	Aldosterone synthesis and secretion	10/413	98/8049	0.0282374	0.045943	0.0165488	3949/1385/779/776/5578/775/5579/4878/476/493	10
hsa04978	Mineral absorption	7/413	59/8049	0.0303855	0.0491723	0.017712	7421/7018/6569/476/3162/6546/493	7
hsa04390	Hippo signaling pathway	14/413	157/8049	0.0305687	0.0492042	0.0177235	5054/894/1499/332/374/4609/1742/2932/6591/7040/54361/6932/7474/595	14
hsa00760	Nicotinate and nicotinamide metabolism	5/413	35/8049	0.0316465	0.0504389	0.0181682	4860/22978/5167/5169/23411	5
hsa04724	Glutamatergic synapse	11/413	114/8049	0.0316888	0.0504389	0.0181682	1742/5595/776/5321/5578/775/5579/5530/2902/5594/9455	11
hsa04973	Carbohydrate digestion and absorption	6/413	47/8049	0.0318385	0.0504389	0.0181682	207/776/5579/8972/476/3099	6
hsa05416	Viral myocarditis	7/413	60/8049	0.0329428	0.0519151	0.0187	841/857/836/3383/842/959/595	7
hsa00500	Starch and sucrose metabolism	5/413	36/8049	0.0352597	0.0552769	0.0199109	8972/5167/5169/3099/5837	5
hsa04918	Thyroid hormone synthesis	8/413	75/8049	0.0375405	0.0585476	0.021089	1385/5578/5579/7173/50506/476/3309/2936	8
hsa04672	Intestinal immune network for IgA production	6/413	49/8049	0.0380918	0.0591011	0.0212884	3569/3586/3565/7040/3558/959	6
hsa00053	Ascorbate and aldarate metabolism	4/413	27/8049	0.0470613	0.0726433	0.0261663	54658/501/217/219	4
hsa00620	Pyruvate metabolism	5/413	39/8049	0.0475773	0.0730651	0.0263183	31/501/217/219/1738	5
hsa04927	Cortisol synthesis and secretion	7/413	65/8049	0.047871	0.073143	0.0263463	3949/1385/779/776/1586/775/3776	7
hsa04140	Autophagy - animal	12/413	137/8049	0.0484452	0.0736464	0.0265277	5599/207/572/598/3630/5728/596/5595/3091/5894/1509/5594	12
hsa05320	Autoimmune thyroid disease	6/413	53/8049	0.0528133	0.0798835	0.0287743	355/3586/3565/3558/959/7173	6
hsa04974	Protein digestion and absorption	9/413	95/8049	0.0541856	0.0815493	0.0293743	1278/1281/1277/1504/5644/476/6546/3784/1803	9
hsa04137	Mitophagy - animal	7/413	68/8049	0.0586091	0.0877678	0.0316142	3725/5599/598/7157/1869/5970/3091	7
hsa04114	Oocyte meiosis	11/413	128/8049	0.0639343	0.0952685	0.034316	3630/995/1017/891/3479/5595/367/1432/5241/5530/5594	11
hsa04670	Leukocyte transendothelial migration	10/413	114/8049	0.0672801	0.0997602	0.0359339	1499/4318/5175/1432/4313/3383/7412/5578/5579/653361	10
hsa00240	Pyrimidine metabolism	6/413	57/8049	0.0705679	0.103111	0.037141	4860/1806/22978/5167/7298/5169	6
hsa00480	Glutathione metabolism	6/413	57/8049	0.0705679	0.103111	0.037141	2539/2944/2950/2946/2936/4953	6
hsa01212	Fatty acid metabolism	6/413	57/8049	0.0705679	0.103111	0.037141	31/34/35/3992/2194/9415	6
hsa00052	Galactose metabolism	4/413	31/8049	0.0720198	0.104724	0.0377221	2683/8972/2720/3099	4
hsa04650	Natural killer cell mediated cytotoxicity	11/413	131/8049	0.0729107	0.105355	0.0379493	355/7124/836/5595/3383/5894/5578/5579/3458/5530/5594	11
hsa04742	Taste transduction	8/413	86/8049	0.0731537	0.105355	0.0379493	3350/775/3351/3352/3359/1131/2554/5024	8
hsa00670	One carbon pool by folate	3/413	20/8049	0.0800022	0.11467	0.0413044	1719/6470/7298	3
hsa04727	GABAergic synapse	8/413	89/8049	0.0855327	0.122016	0.0439505	779/774/776/5578/775/5579/2567/2554	8
hsa00900	Terpenoid backbone biosynthesis	3/413	22/8049	0.100353	0.142482	0.0513226	2224/3156/2339	3
hsa04666	Fc gamma R-mediated phagocytosis	8/413	93/8049	0.10383	0.146727	0.0528513	207/5595/5321/5894/5578/5579/653361/5594	8
hsa00130	Ubiquinone and other terpenoid-quinone biosynthesis	2/413	11/8049	0.106363	0.149603	0.0538876	1728/79001	2
hsa04060	Cytokine-cytokine receptor interaction	20/413	294/8049	0.119517	0.167324	0.0602707	355/7124/3553/3569/3586/7133/3576/3952/3565/6373/3596/7040/3627/3552/3558/3458/959/1236/6347/7132	20
hsa00230	Purine metabolism	10/413	130/8049	0.130293	0.181565	0.0654003	4860/7498/22978/5167/5144/5169/5139/2987/132/3615	10
hsa00592	alpha-Linolenic acid metabolism	3/413	25/8049	0.134228	0.186187	0.0670652	5321/151056/9415	3
hsa05012	Parkinson disease	17/413	249/8049	0.139523	0.192644	0.069391	5599/598/7157/4780/1813/836/581/842/7054/6531/4129/4128/1812/3309/135/6263/81027	17
hsa03450	Non-homologous end-joining	2/413	13/8049	0.141163	0.194019	0.0698862	3981/5591	2
hsa05033	Nicotine addiction	4/413	40/8049	0.147273	0.201496	0.0725793	774/2567/2902/2554	4
hsa05034	Alcoholism	13/413	187/8049	0.163645	0.222883	0.0802831	1385/1813/5595/5894/7054/6531/4129/4128/1812/136/2902/5594/135	13
hsa04922	Glucagon signaling pathway	8/413	106/8049	0.176662	0.23921	0.086164	207/31/1385/5465/5530/5564/23411/5837	8
hsa04975	Fat digestion and absorption	4/413	43/8049	0.177222	0.23921	0.086164	4547/338/948/19	4
hsa00630	Glyoxylate and dicarboxylate metabolism	3/413	30/8049	0.19764	0.265578	0.095662	6470/847/1738	3
hsa00310	Lysine degradation	5/413	61/8049	0.2023	0.270633	0.0974827	501/217/219/1738/2639	5
hsa04721	Synaptic vesicle cycle	6/413	78/8049	0.210207	0.279966	0.100845	774/6531/6532/26052/6804/6530	6
hsa00910	Nitrogen metabolism	2/413	17/8049	0.215982	0.28639	0.103158	766/760	2
hsa04360	Axon guidance	12/413	181/8049	0.218899	0.288985	0.104093	2932/5595/4233/5894/5921/5578/54361/2048/6469/5530/7474/5594	12
hsa00061	Fatty acid biosynthesis	2/413	18/8049	0.235267	0.309238	0.111388	31/2194	2
hsa00270	Cysteine and methionine metabolism	4/413	49/8049	0.242273	0.317061	0.114206	1786/1788/2805/259307	4
hsa04640	Hematopoietic cell lineage	7/413	99/8049	0.244977	0.319212	0.114981	7124/3553/3569/3565/3690/3552/948	7
hsa00640	Propanoate metabolism	3/413	34/8049	0.252524	0.327628	0.118013	31/35/1738	3
hsa00250	Alanine, aspartate and glutamate metabolism	3/413	36/8049	0.280754	0.36114	0.130084	2805/259307/443	3
hsa03030	DNA replication	3/413	36/8049	0.280754	0.36114	0.130084	5424/5111/5426	3
hsa04512	ECM-receptor interaction	6/413	88/8049	0.296918	0.380308	0.136988	1278/6696/3690/1277/948/375790	6
hsa04810	Regulation of actin cytoskeleton	13/413	214/8049	0.304547	0.388427	0.139912	1956/3630/5595/2263/1950/3690/5894/2147/8074/1129/1128/1131/5594	13
hsa04530	Tight junction	10/413	162/8049	0.31943	0.404674	0.145765	3725/5599/1019/5111/2064/776/595/5564/1080/9693	10
hsa05100	Bacterial invasion of epithelial cells	5/413	73/8049	0.319975	0.404674	0.145765	1499/857/4233/859/26052	5
hsa03430	Mismatch repair	2/413	23/8049	0.331925	0.416289	0.149948	5424/5111	2
hsa04964	Proximal tubule bicarbonate reclamation	2/413	23/8049	0.331925	0.416289	0.149948	476/760	2
hsa04350	TGF-beta signaling pathway	6/413	94/8049	0.351941	0.437946	0.157749	7124/4609/5595/7040/3458/5594	6
hsa04216	Ferroptosis	3/413	41/8049	0.352103	0.437946	0.157749	7157/7018/3162	3
hsa00860	Porphyrin and chlorophyll metabolism	3/413	42/8049	0.36634	0.45378	0.163453	54658/326625/3162	3
hsa04612	Antigen processing and presentation	5/413	78/8049	0.371517	0.458306	0.165083	7124/1385/3326/3458/3309	5
hsa04145	Phagosome	9/413	152/8049	0.378324	0.464798	0.167421	4842/3690/948/4973/718/4353/715/653361/81027	9
hsa00561	Glycerolipid metabolism	4/413	61/8049	0.38265	0.468201	0.168647	501/217/219/11343	4
hsa01200	Carbon metabolism	7/413	117/8049	0.394153	0.480324	0.173014	6470/847/2539/35/2805/1738/3099	7
hsa01040	Biosynthesis of unsaturated fatty acids	2/413	27/8049	0.406812	0.49364	0.177811	3992/9415	2
hsa05014	Amyotrophic lateral sclerosis	20/413	364/8049	0.40836	0.49364	0.177811	572/598/7124/7157/3084/596/6647/7133/836/847/581/4842/1432/842/4843/5530/2902/3309/7132/81027	20
hsa04146	Peroxisome	5/413	83/8049	0.423095	0.509406	0.183489	6647/847/4843/7498/1610	5
hsa03420	Nucleotide excision repair	3/413	47/8049	0.436413	0.523347	0.188511	5424/5111/5426	3
hsa05168	Herpes simplex virus 1 infection	26/413	490/8049	0.458886	0.548114	0.197432	207/355/572/598/7124/3551/7157/4790/841/5970/1147/3553/3569/596/8772/6772/836/581/3690/842/4792/5371/718/3458/6347/7132	26
hsa05110	Vibrio cholerae infection	3/413	50/8049	0.477065	0.565767	0.203791	5578/3784/1080	3
hsa04710	Circadian rhythm	2/413	31/8049	0.477425	0.565767	0.203791	1385/5564	2
hsa04514	Cell adhesion molecules	8/413	149/8049	0.499821	0.589985	0.212514	5175/3383/9378/9369/7412/6401/959/6403	8
hsa00533	Glycosaminoglycan biosynthesis - keratan sulfate	1/413	14/8049	0.521954	0.613703	0.221058	2683	1
hsa00040	Pentose and glucuronate interconversions	2/413	34/8049	0.526907	0.617117	0.222287	9365/54658	2
hsa00604	Glycosphingolipid biosynthesis - ganglio series	1/413	15/8049	0.546525	0.637613	0.22967	2720	1
hsa05150	Staphylococcus aureus infection	5/413	96/8049	0.551708	0.641174	0.230953	3586/3383/718/715/6403	5
hsa00120	Primary bile acid biosynthesis	1/413	17/8049	0.591953	0.682674	0.245901	1593	1
hsa00450	Selenocompound metabolism	1/413	17/8049	0.591953	0.682674	0.245901	7296	1
hsa00511	Other glycan degradation	1/413	18/8049	0.612934	0.701495	0.252681	2720	1
hsa01210	2-Oxocarboxylic acid metabolism	1/413	18/8049	0.612934	0.701495	0.252681	2805	1
hsa03440	Homologous recombination	2/413	41/8049	0.629509	0.717736	0.258531	5424/672	2
hsa00531	Glycosaminoglycan degradation	1/413	19/8049	0.632839	0.71881	0.258917	2720	1
hsa05017	Spinocerebellar ataxia	6/413	133/8049	0.684773	0.774874	0.279112	5599/207/5578/5579/3752/2902	6
hsa00515	Mannose type O-glycan biosynthesis	1/413	23/8049	0.702757	0.789271	0.284298	2683	1
hsa03060	Protein export	1/413	23/8049	0.702757	0.789271	0.284298	3309	1
hsa05322	Systemic lupus erythematosus	6/413	136/8049	0.705362	0.789271	0.284298	7124/3586/718/3458/715/959	6
hsa05016	Huntington disease	14/413	306/8049	0.711121	0.792768	0.285557	5599/7157/841/6647/1742/1385/836/774/581/5468/842/2902/6804/81027	14
hsa00565	Ether lipid metabolism	2/413	49/8049	0.724617	0.804833	0.289903	5321/151056	2
hsa01230	Biosynthesis of amino acids	3/413	74/8049	0.739576	0.818428	0.2948	6470/5053/2805	3
hsa04950	Maturity onset diabetes of the young	1/413	26/8049	0.746328	0.821762	0.296001	3630	1
hsa00564	Glycerophospholipid metabolism	4/413	98/8049	0.748049	0.821762	0.296001	5321/43/1119/151056	4
hsa00601	Glycosphingolipid biosynthesis - lacto and neolacto series	1/413	27/8049	0.759386	0.828171	0.298309	2683	1
hsa04966	Collecting duct acid secretion	1/413	27/8049	0.759386	0.828171	0.298309	760	1
hsa04330	Notch signaling pathway	2/413	53/8049	0.763921	0.830109	0.299007	6868/22938	2
hsa00650	Butanoate metabolism	1/413	28/8049	0.771773	0.835625	0.300995	35	1
hsa00020	Citrate cycle (TCA cycle)	1/413	30/8049	0.794672	0.854273	0.307712	1738	1
hsa00030	Pentose phosphate pathway	1/413	30/8049	0.794672	0.854273	0.307712	2539	1
hsa00051	Fructose and mannose metabolism	1/413	33/8049	0.824795	0.878953	0.316601	3099	1
hsa04130	SNARE interactions in vesicular transport	1/413	33/8049	0.824795	0.878953	0.316601	6804	1
hsa04144	Endocytosis	10/413	248/8049	0.826391	0.878953	0.316601	1956/3949/408/857/409/2263/859/5371/26052/4193	10
hsa04714	Thermogenesis	9/413	231/8049	0.845819	0.896448	0.322903	1385/1268/1432/5468/155/4878/55818/5564/11343	9
hsa04141	Protein processing in endoplasmic reticulum	6/413	167/8049	0.864996	0.910916	0.328114	5599/596/4780/581/3326/3309	6
hsa05340	Primary immunodeficiency	1/413	38/8049	0.865521	0.910916	0.328114	959	1
hsa00513	Various types of N-glycan biosynthesis	1/413	39/8049	0.872454	0.915013	0.32959	2683	1
hsa04070	Phosphatidylinositol signaling system	3/413	97/8049	0.881511	0.921301	0.331855	5728/5578/5579	3
hsa00562	Inositol phosphate metabolism	2/413	73/8049	0.895269	0.932443	0.335869	5728/5294	2
hsa04962	Vasopressin-regulated water reabsorption	1/413	44/8049	0.902122	0.936341	0.337273	1385	1
hsa03050	Proteasome	1/413	46/8049	0.911962	0.941529	0.339141	3458	1
hsa00514	Other types of O-glycan biosynthesis	1/413	47/8049	0.916505	0.941529	0.339141	2683	1
hsa00600	Sphingolipid metabolism	1/413	47/8049	0.916505	0.941529	0.339141	2720	1
hsa00520	Amino sugar and nucleotide sugar metabolism	1/413	48/8049	0.920814	0.942739	0.339577	3099	1
hsa00510	N-Glycan biosynthesis	1/413	50/8049	0.928779	0.947669	0.341353	2683	1
hsa03460	Fanconi anemia pathway	1/413	54/8049	0.94239	0.958308	0.345185	672	1
hsa04120	Ubiquitin mediated proteolysis	3/413	140/8049	0.977598	0.990764	0.356876	672/5371/4193	3
hsa04142	Lysosome	2/413	128/8049	0.991023	1	0.360203	1509/2720	2
hsa03040	Spliceosome	1/413	151/8049	0.999675	1	0.360203	22938	1
hsa03013	RNA transport	1/413	186/8049	0.999951	1	0.360203	7341	1
hsa04740	Olfactory transduction	3/413	448/8049	1	1	0.360203	408/409/6546	3
