# Supplementary material for: A Multi-Scale Bioinformatics Study on Novel Mechanism of Xintong Granule for Treating Coronary Heart Disease by Network Pharmacology and Molecular Docking Verification
Source: Research Square preprint supplement (doi:10.21203/rs.3.rs-116130/v1), 2020-12-01
Supplement: Supplementary file 2 [file 317b711a5b63efb5458e8429.xlsx]

## Sheet: Table S6 
Supplementary Table 6 The information of GO enrichment analysis for each cluster
Module 1	ONTOLOGY	ID	Description	pvalue	p.adjust	qvalue	geneID	Count
	BP	GO:0007187	G protein-coupled receptor signaling pathway, coupled to cyclic nucleotide second messenger	5.57264e-33	9.09456e-30	4.49331e-30	HTR1A/ADRA2C/CNR2/CXCL10/DRD2/ADORA1/HTR1D/MTNR1A/MTNR1B/CNR1/ADRA2B/CXCL11/CHRM2/OPRM1/GPER1/OPRK1/ANXA1/OPRD1/ADRA2A/HTR1B	20
	BP	GO:0007188	adenylate cyclase-modulating G protein-coupled receptor signaling pathway	2.68172e-27	2.18828e-24	1.08115e-24	HTR1A/ADRA2C/CXCL10/DRD2/ADORA1/HTR1D/MTNR1A/CNR1/ADRA2B/CXCL11/CHRM2/OPRM1/GPER1/OPRK1/OPRD1/ADRA2A/HTR1B	17
	BP	GO:0007193	adenylate cyclase-inhibiting G protein-coupled receptor signaling pathway	1.11e-19	6.03841e-17	2.98337e-17	HTR1A/DRD2/ADORA1/HTR1D/MTNR1A/CHRM2/OPRM1/OPRK1/OPRD1/ADRA2A/HTR1B	11
	BP	GO:0023061	signal release	1.95646e-16	7.98235e-14	3.94381e-14	HTR1A/ADRA2C/DRD2/ADORA1/MTNR1B/CNR1/ADRA2B/CHRM2/OPRM1/GPER1/OPRK1/ANXA1/ADRA2A/HTR1B	14
	BP	GO:1903531	negative regulation of secretion by cell	1.96933e-15	6.42788e-13	3.1758e-13	ADRA2C/DRD2/ADORA1/MTNR1B/CNR1/ADRA2B/OPRM1/OPRK1/ANXA1/ADRA2A/HTR1B	11
	BP	GO:0051048	negative regulation of secretion	7.48325e-15	2.03544e-12	1.00564e-12	ADRA2C/DRD2/ADORA1/MTNR1B/CNR1/ADRA2B/OPRM1/OPRK1/ANXA1/ADRA2A/HTR1B	11
	BP	GO:0046883	regulation of hormone secretion	2.55417e-14	5.95486e-12	2.94209e-12	HTR1A/ADRA2C/DRD2/ADORA1/MTNR1B/CNR1/ADRA2B/GPER1/OPRK1/ANXA1/ADRA2A	11
	BP	GO:0050795	regulation of behavior	4.30711e-14	8.7865e-12	4.34111e-12	HTR1A/DRD2/ADORA1/HTR1D/MTNR1B/CNR1/OPRK1/HTR1B	8
	BP	GO:0046879	hormone secretion	1.47202e-13	2.44447e-11	1.20773e-11	HTR1A/ADRA2C/DRD2/ADORA1/MTNR1B/CNR1/ADRA2B/GPER1/OPRK1/ANXA1/ADRA2A	11
	BP	GO:0035296	regulation of tube diameter	1.96754e-13	2.44447e-11	1.20773e-11	HTR1A/ADRA2C/ADORA1/HTR1D/MTNR1B/ADRA2B/GPER1/ADRA2A/HTR1B	9
	BP	GO:0050880	regulation of blood vessel size	1.96754e-13	2.44447e-11	1.20773e-11	HTR1A/ADRA2C/ADORA1/HTR1D/MTNR1B/ADRA2B/GPER1/ADRA2A/HTR1B	9
	BP	GO:0097746	regulation of blood vessel diameter	1.96754e-13	2.44447e-11	1.20773e-11	HTR1A/ADRA2C/ADORA1/HTR1D/MTNR1B/ADRA2B/GPER1/ADRA2A/HTR1B	9
	BP	GO:0009914	hormone transport	2.0788e-13	2.44447e-11	1.20773e-11	HTR1A/ADRA2C/DRD2/ADORA1/MTNR1B/CNR1/ADRA2B/GPER1/OPRK1/ANXA1/ADRA2A	11
	BP	GO:0035150	regulation of tube size	2.09697e-13	2.44447e-11	1.20773e-11	HTR1A/ADRA2C/ADORA1/HTR1D/MTNR1B/ADRA2B/GPER1/ADRA2A/HTR1B	9
	BP	GO:0015844	monoamine transport	3.08725e-13	3.35893e-11	1.65953e-11	HTR1A/ADRA2C/DRD2/CNR1/ADRA2B/OPRK1/ADRA2A/HTR1B	8
	BP	GO:0051952	regulation of amine transport	4.82029e-13	4.91669e-11	2.42917e-11	ADRA2C/DRD2/ADORA1/CNR1/ADRA2B/OPRK1/ADRA2A/HTR1B	8
	BP	GO:0015837	amine transport	8.64425e-13	8.29848e-11	4.1e-11	ADRA2C/DRD2/ADORA1/CNR1/ADRA2B/OPRK1/ADRA2A/HTR1B	8
	BP	GO:0003018	vascular process in circulatory system	1.1149e-12	9.76939e-11	4.82672e-11	HTR1A/ADRA2C/ADORA1/HTR1D/MTNR1B/ADRA2B/GPER1/ADRA2A/HTR1B	9
	BP	GO:0051953	negative regulation of amine transport	1.13737e-12	9.76939e-11	4.82672e-11	ADRA2C/DRD2/ADORA1/CNR1/ADRA2B/ADRA2A	6
	BP	GO:0006939	smooth muscle contraction	1.60391e-12	1.30879e-10	6.46628e-11	ADRA2C/DRD2/ADORA1/HTR1D/ADRA2B/CHRM2/GPER1/ADRA2A	8
	BP	GO:0050433	regulation of catecholamine secretion	1.96554e-12	1.5275e-10	7.54688e-11	ADRA2C/DRD2/CNR1/ADRA2B/OPRK1/ADRA2A/HTR1B	7
	BP	GO:0050432	catecholamine secretion	2.47835e-12	1.83849e-10	9.08335e-11	ADRA2C/DRD2/CNR1/ADRA2B/OPRK1/ADRA2A/HTR1B	7
	BP	GO:0046888	negative regulation of hormone secretion	3.10145e-12	2.20068e-10	1.08728e-10	ADRA2C/DRD2/ADORA1/MTNR1B/ADRA2B/OPRK1/ADRA2A	7
	BP	GO:0019932	second-messenger-mediated signaling	6.03366e-12	4.10289e-10	2.0271e-10	ADRA2C/CXCL10/DRD2/MTNR1B/ADRA2B/CXCL11/CXCL8/OPRM1/GPER1/CCR7/ADRA2A	11
	BP	GO:0019935	cyclic-nucleotide-mediated signaling	7.94126e-12	5.18405e-10	2.56126e-10	ADRA2C/CXCL10/DRD2/MTNR1B/ADRA2B/CXCL11/OPRM1/GPER1/ADRA2A	9
	BP	GO:0051937	catecholamine transport	9.48329e-12	5.76021e-10	2.84592e-10	ADRA2C/DRD2/CNR1/ADRA2B/OPRK1/ADRA2A/HTR1B	7
	BP	GO:0006874	cellular calcium ion homeostasis	9.52976e-12	5.76021e-10	2.84592e-10	CXCL10/DRD2/ADORA1/MTNR1B/GPR55/CNR1/CXCL11/GPER1/APP/CCR7/HTR1B	11
	BP	GO:0033604	negative regulation of catecholamine secretion	1.03578e-11	6.03712e-10	2.98273e-10	ADRA2C/DRD2/CNR1/ADRA2B/ADRA2A	5
	BP	GO:0007189	adenylate cyclase-activating G protein-coupled receptor signaling pathway	1.07487e-11	6.04891e-10	2.98856e-10	ADRA2C/CXCL10/DRD2/ADRA2B/CXCL11/OPRM1/GPER1/ADRA2A	8
	BP	GO:0055074	calcium ion homeostasis	1.28827e-11	7.00818e-10	3.4625e-10	CXCL10/DRD2/ADORA1/MTNR1B/GPR55/CNR1/CXCL11/GPER1/APP/CCR7/HTR1B	11
	BP	GO:0097756	negative regulation of blood vessel diameter	1.77501e-11	9.34455e-10	4.61683e-10	HTR1A/ADRA2C/ADORA1/HTR1D/ADRA2B/ADRA2A/HTR1B	7
	BP	GO:0072503	cellular divalent inorganic cation homeostasis	2.10473e-11	1.07341e-09	5.30337e-10	CXCL10/DRD2/ADORA1/MTNR1B/GPR55/CNR1/CXCL11/GPER1/APP/CCR7/HTR1B	11
	BP	GO:0051480	regulation of cytosolic calcium ion concentration	2.33291e-11	1.15373e-09	5.70019e-10	CXCL10/DRD2/ADORA1/MTNR1B/GPR55/CNR1/CXCL11/GPER1/CCR7/HTR1B	10
	BP	GO:0007200	phospholipase C-activating G protein-coupled receptor signaling pathway	6.18412e-11	2.96838e-09	1.46657e-09	DRD2/GPR55/CHRM2/OPRM1/OPRK1/OPRD1/ADRA2A	7
	BP	GO:0007631	feeding behavior	6.6387e-11	3.09553e-09	1.5294e-09	DRD2/CNR1/OPRM1/APP/OPRK1/OPRD1/HTR1B	7
	BP	GO:0019233	sensory perception of pain	8.17753e-11	3.70715e-09	1.83158e-09	ADRA2C/CNR2/ADORA1/CNR1/OPRM1/OPRK1/OPRD1	7
	BP	GO:0019933	cAMP-mediated signaling	1.16727e-10	5.1486e-09	2.54375e-09	ADRA2C/CXCL10/DRD2/ADRA2B/CXCL11/OPRM1/GPER1/ADRA2A	8
	BP	GO:0006940	regulation of smooth muscle contraction	3.06469e-10	1.3162e-08	6.50292e-09	ADRA2C/ADORA1/ADRA2B/CHRM2/GPER1/ADRA2A	6
	BP	GO:1904062	regulation of cation transmembrane transport	4.9664e-10	2.07825e-08	1.02679e-08	CXCL10/DRD2/MTNR1B/CXCL11/OPRM1/GPER1/APP/OPRK1/ADRA2A	9
	BP	GO:0031644	regulation of neurological system process	5.74835e-10	2.34533e-08	1.15875e-08	ADRA2C/ADORA1/MTNR1B/OPRM1/APP/OPRK1/OPRD1	7
	BP	GO:0002791	regulation of peptide secretion	6.27354e-10	2.49718e-08	1.23377e-08	ADRA2C/DRD2/ADORA1/MTNR1B/CNR1/OPRM1/GPER1/CCR7/ANXA1/ADRA2A	10
	BP	GO:0032228	regulation of synaptic transmission, GABAergic	6.83584e-10	2.65621e-08	1.31234e-08	CNR2/DRD2/ADORA1/CNR1/HTR1B	5
	BP	GO:0042310	vasoconstriction	8.02977e-10	3.04758e-08	1.5057e-08	HTR1A/ADRA2C/HTR1D/ADRA2B/ADRA2A/HTR1B	6
	BP	GO:0015850	organic hydroxy compound transport	1.69721e-09	6.25338e-08	3.08958e-08	HTR1A/ADRA2C/DRD2/CNR1/ADRA2B/OPRK1/ADRA2A/HTR1B	8
	BP	GO:0010959	regulation of metal ion transport	1.72428e-09	6.25338e-08	3.08958e-08	CXCL10/DRD2/ADORA1/MTNR1B/CXCL11/GPER1/OPRK1/OPRD1/ADRA2A	9
	BP	GO:0051930	regulation of sensory perception of pain	1.94165e-09	6.88862e-08	3.40344e-08	ADRA2C/ADORA1/OPRM1/OPRK1/OPRD1	5
	BP	GO:0051931	regulation of sensory perception	2.21694e-09	7.69798e-08	3.80331e-08	ADRA2C/ADORA1/OPRM1/OPRK1/OPRD1	5
	BP	GO:0042391	regulation of membrane potential	4.01581e-09	1.36457e-07	6.74186e-08	CNR2/DRD2/ADORA1/MTNR1B/CNR1/OPRM1/GPER1/APP/OPRD1	9
	BP	GO:0051932	synaptic transmission, GABAergic	4.09704e-09	1.36457e-07	6.74186e-08	CNR2/DRD2/ADORA1/CNR1/HTR1B	5
	BP	GO:0050708	regulation of protein secretion	8.33681e-09	2.72113e-07	1.34442e-07	ADRA2C/DRD2/MTNR1B/CNR1/OPRM1/GPER1/CCR7/ANXA1/ADRA2A	9
	BP	GO:0034765	regulation of ion transmembrane transport	1.01816e-08	3.1916e-07	1.57686e-07	CXCL10/DRD2/MTNR1B/CXCL11/OPRM1/GPER1/APP/OPRK1/ADRA2A	9
	BP	GO:0030073	insulin secretion	1.0237e-08	3.1916e-07	1.57686e-07	ADRA2C/DRD2/MTNR1B/CNR1/GPER1/ANXA1/ADRA2A	7
	BP	GO:0032496	response to lipopolysaccharide	1.03649e-08	3.1916e-07	1.57686e-07	CNR2/CXCL10/CNR1/CXCL11/CXCL8/OPRM1/OPRK1/CCR7	8
	BP	GO:0042220	response to cocaine	1.15567e-08	3.49268e-07	1.72561e-07	DRD2/CNR1/OPRM1/OPRK1/HTR1B	5
	BP	GO:0002237	response to molecule of bacterial origin	1.40062e-08	4.15603e-07	2.05336e-07	CNR2/CXCL10/CNR1/CXCL11/CXCL8/OPRM1/OPRK1/CCR7	8
	BP	GO:0002438	acute inflammatory response to antigenic stimulus	1.73986e-08	5.07045e-07	2.50513e-07	CNR1/OPRM1/CCR7/C3	4
	BP	GO:0006936	muscle contraction	2.0402e-08	5.84142e-07	2.88605e-07	ADRA2C/DRD2/ADORA1/HTR1D/ADRA2B/CHRM2/GPER1/ADRA2A	8
	BP	GO:0060359	response to ammonium ion	2.61307e-08	7.35264e-07	3.63269e-07	DRD2/CNR1/CHRM2/OPRM1/OPRK1/HTR1B	6
	BP	GO:0051588	regulation of neurotransmitter transport	3.11216e-08	8.60856e-07	4.2532e-07	HTR1A/DRD2/CNR1/CHRM2/GPER1/HTR1B	6
	BP	GO:0030072	peptide hormone secretion	3.75768e-08	1.02209e-06	5.0498e-07	ADRA2C/DRD2/MTNR1B/CNR1/GPER1/ANXA1/ADRA2A	7
	BP	GO:0008277	regulation of G protein-coupled receptor signaling pathway	4.71317e-08	1.26097e-06	6.23001e-07	DRD2/CXCL8/OPRM1/GPER1/C3/HTR1B	6
	BP	GO:0043271	negative regulation of ion transport	6.43681e-08	1.69433e-06	8.37113e-07	DRD2/ADORA1/MTNR1B/CNR1/ADRA2A/HTR1B	6
	BP	GO:0072347	response to anesthetic	6.86338e-08	1.77794e-06	8.78421e-07	DRD2/CNR1/OPRM1/OPRK1/HTR1B	5
	BP	GO:0043270	positive regulation of ion transport	7.21578e-08	1.84002e-06	9.09093e-07	CXCL10/DRD2/ADORA1/CXCL11/GPER1/OPRK1/ADRA2A	7
	BP	GO:0006816	calcium ion transport	8.65041e-08	2.17192e-06	1.07307e-06	CXCL10/DRD2/CXCL11/OPRM1/GPER1/CCR7/OPRD1/ADRA2A	8
	BP	GO:0050804	modulation of chemical synaptic transmission	8.96157e-08	2.18897e-06	1.0815e-06	CNR2/DRD2/ADORA1/CNR1/CHRM2/GPER1/APP/HTR1B	8
	BP	GO:0071880	adenylate cyclase-activating adrenergic receptor signaling pathway	9.06109e-08	2.18897e-06	1.0815e-06	ADRA2C/DRD2/ADRA2B/ADRA2A	4
	BP	GO:0099177	regulation of trans-synaptic signaling	9.12073e-08	2.18897e-06	1.0815e-06	CNR2/DRD2/ADORA1/CNR1/CHRM2/GPER1/APP/HTR1B	8
	BP	GO:0006937	regulation of muscle contraction	1.06933e-07	2.52921e-06	1.2496e-06	ADRA2C/ADORA1/ADRA2B/CHRM2/GPER1/ADRA2A	6
	BP	GO:0010469	regulation of signaling receptor activity	1.14568e-07	2.66598e-06	1.31717e-06	ADRA2C/ADORA1/ADRA2B/OPRM1/APP/ADRA2A	6
	BP	GO:0014072	response to isoquinoline alkaloid	1.17617e-07	2.66598e-06	1.31717e-06	DRD2/CNR1/OPRM1/OPRK1	4
	BP	GO:0043278	response to morphine	1.17617e-07	2.66598e-06	1.31717e-06	DRD2/CNR1/OPRM1/OPRK1	4
	BP	GO:1903522	regulation of blood circulation	1.21941e-07	2.72613e-06	1.34689e-06	ADRA2C/DRD2/ADORA1/ADRA2B/ADORA3/CHRM2/ADRA2A	7
	BP	GO:0050796	regulation of insulin secretion	1.26857e-07	2.79771e-06	1.38225e-06	ADRA2C/DRD2/MTNR1B/CNR1/GPER1/ADRA2A	6
	BP	GO:0071875	adrenergic receptor signaling pathway	1.33173e-07	2.85972e-06	1.41289e-06	ADRA2C/DRD2/ADRA2B/ADRA2A	4
	BP	GO:0098664	G protein-coupled serotonin receptor signaling pathway	1.33173e-07	2.85972e-06	1.41289e-06	HTR1A/HTR1D/CHRM2/HTR1B	4
	BP	GO:0003012	muscle system process	1.46856e-07	3.11259e-06	1.53783e-06	ADRA2C/DRD2/ADORA1/HTR1D/ADRA2B/CHRM2/GPER1/ADRA2A	8
	BP	GO:0070588	calcium ion transmembrane transport	1.81875e-07	3.80538e-06	1.88011e-06	CXCL10/DRD2/CXCL11/OPRM1/GPER1/CCR7/ADRA2A	7
	BP	GO:2000273	positive regulation of signaling receptor activity	1.89118e-07	3.90685e-06	1.93024e-06	ADRA2C/ADORA1/ADRA2B/ADRA2A	4
	BP	GO:0070838	divalent metal ion transport	1.9634e-07	3.99184e-06	1.97223e-06	CXCL10/DRD2/CXCL11/OPRM1/GPER1/CCR7/OPRD1/ADRA2A	8
	BP	GO:0007204	positive regulation of cytosolic calcium ion concentration	1.98124e-07	3.99184e-06	1.97223e-06	CXCL10/DRD2/GPR55/CNR1/CXCL11/GPER1/CCR7	7
	BP	GO:0072511	divalent inorganic cation transport	2.15744e-07	4.29384e-06	2.12144e-06	CXCL10/DRD2/CXCL11/OPRM1/GPER1/CCR7/OPRD1/ADRA2A	8
	BP	GO:0007210	serotonin receptor signaling pathway	2.3508e-07	4.6223e-06	2.28372e-06	HTR1A/HTR1D/CHRM2/HTR1B	4
	BP	GO:0002685	regulation of leukocyte migration	2.39666e-07	4.65637e-06	2.30055e-06	CXCL10/ADORA1/CXCL8/APP/CCR7/ANXA1	6
	BP	GO:0050900	leukocyte migration	2.51758e-07	4.83375e-06	2.38819e-06	CNR2/CXCL10/ADORA1/CXCL11/CXCL8/APP/CCR7/ANXA1	8
	BP	GO:0014046	dopamine secretion	2.60954e-07	4.89513e-06	2.41852e-06	DRD2/CNR1/OPRK1/HTR1B	4
	BP	GO:0014059	regulation of dopamine secretion	2.60954e-07	4.89513e-06	2.41852e-06	DRD2/CNR1/OPRK1/HTR1B	4
	BP	GO:0070472	regulation of uterine smooth muscle contraction	2.85846e-07	5.30115e-06	2.61912e-06	ADRA2C/ADRA2B/GPER1	3
	BP	GO:0046928	regulation of neurotransmitter secretion	2.91762e-07	5.35007e-06	2.64329e-06	DRD2/CNR1/CHRM2/GPER1/HTR1B	5
	BP	GO:0043266	regulation of potassium ion transport	3.06063e-07	5.54994e-06	2.74204e-06	DRD2/ADORA1/MTNR1B/OPRK1/ADRA2A	5
	BP	GO:0090276	regulation of peptide hormone secretion	3.40086e-07	6.09912e-06	3.01337e-06	ADRA2C/DRD2/MTNR1B/CNR1/GPER1/ADRA2A	6
	BP	GO:0015696	ammonium transport	3.52323e-07	6.2499e-06	3.08786e-06	HTR1A/DRD2/CNR1/OPRK1/HTR1B	5
	BP	GO:0070471	uterine smooth muscle contraction	3.92675e-07	6.89082e-06	3.40452e-06	ADRA2C/ADRA2B/GPER1	3
	BP	GO:0070374	positive regulation of ERK1 and ERK2 cascade	4.13112e-07	7.17233e-06	3.5436e-06	DRD2/GPR55/OPRM1/GPER1/APP/CCR7	6
	BP	GO:0017158	regulation of calcium ion-dependent exocytosis	4.22431e-07	7.18133e-06	3.54805e-06	DRD2/CNR1/CHRM2/ADRA2A/HTR1B	5
	BP	GO:0043279	response to alkaloid	4.22431e-07	7.18133e-06	3.54805e-06	DRD2/CNR1/OPRM1/OPRK1/HTR1B	5
	BP	GO:0017157	regulation of exocytosis	4.36191e-07	7.3388e-06	3.62585e-06	DRD2/CNR1/CHRM2/ANXA1/ADRA2A/HTR1B	6
	BP	GO:0002437	inflammatory response to antigenic stimulus	4.63326e-07	7.71579e-06	3.81211e-06	CNR1/OPRM1/CCR7/C3	4
	BP	GO:0002863	positive regulation of inflammatory response to antigenic stimulus	5.23083e-07	8.49082e-06	4.19502e-06	CNR1/CCR7/C3	3
	BP	GO:0038003	opioid receptor signaling pathway	5.23083e-07	8.49082e-06	4.19502e-06	OPRM1/OPRK1/OPRD1	3
	BP	GO:0030595	leukocyte chemotaxis	5.25473e-07	8.49082e-06	4.19502e-06	CNR2/CXCL10/CXCL11/CXCL8/CCR7/ANXA1	6
	BP	GO:0097305	response to alcohol	6.61799e-07	1.05888e-05	5.23156e-06	DRD2/CNR1/OPRM1/OPRK1/CCR7/HTR1B	6
	BP	GO:0071621	granulocyte chemotaxis	6.73379e-07	1.0661e-05	5.26726e-06	CXCL10/CXCL11/CXCL8/CCR7/ANXA1	5
	BP	GO:0002864	regulation of acute inflammatory response to antigenic stimulus	6.7938e-07	1.0661e-05	5.26726e-06	CNR1/CCR7/C3	3
	BP	GO:0051209	release of sequestered calcium ion into cytosol	7.01013e-07	1.08958e-05	5.38322e-06	CXCL10/DRD2/CXCL11/GPER1/CCR7	5
	BP	GO:0045471	response to ethanol	7.29536e-07	1.12321e-05	5.5494e-06	DRD2/CNR1/OPRM1/OPRK1/HTR1B	5
	BP	GO:0051283	negative regulation of sequestering of calcium ion	7.58968e-07	1.15497e-05	5.70633e-06	CXCL10/DRD2/CXCL11/GPER1/CCR7	5
	BP	GO:0015872	dopamine transport	7.64321e-07	1.15497e-05	5.70633e-06	DRD2/CNR1/OPRK1/HTR1B	4
	BP	GO:0051282	regulation of sequestering of calcium ion	8.20646e-07	1.22539e-05	6.05422e-06	CXCL10/DRD2/CXCL11/GPER1/CCR7	5
	BP	GO:0045744	negative regulation of G protein-coupled receptor signaling pathway	8.25935e-07	1.22539e-05	6.05422e-06	DRD2/CXCL8/OPRM1/HTR1B	4
	BP	GO:0051208	sequestering of calcium ion	9.20519e-07	1.35341e-05	6.68675e-06	CXCL10/DRD2/CXCL11/GPER1/CCR7	5
	BP	GO:0019216	regulation of lipid metabolic process	1.07318e-06	1.56378e-05	7.72612e-06	ADORA1/CNR1/GPER1/CCR7/C3/ANXA1/ADRA2A	7
	BP	GO:0051924	regulation of calcium ion transport	1.09523e-06	1.58178e-05	7.81505e-06	CXCL10/DRD2/CXCL11/GPER1/OPRD1/ADRA2A	6
	BP	GO:0090257	regulation of muscle system process	1.22686e-06	1.75635e-05	8.67751e-06	ADRA2C/ADORA1/ADRA2B/CHRM2/GPER1/ADRA2A	6
	BP	GO:0097553	calcium ion transmembrane import into cytosol	1.27885e-06	1.81486e-05	8.96661e-06	CXCL10/DRD2/CXCL11/GPER1/CCR7	5
	BP	GO:0050709	negative regulation of protein secretion	1.32462e-06	1.83471e-05	9.0647e-06	DRD2/MTNR1B/OPRM1/ANXA1/ADRA2A	5
	BP	GO:0097530	granulocyte migration	1.32462e-06	1.83471e-05	9.0647e-06	CXCL10/CXCL11/CXCL8/CCR7/ANXA1	5
	BP	GO:0014061	regulation of norepinephrine secretion	1.32657e-06	1.83471e-05	9.0647e-06	ADRA2C/ADRA2B/ADRA2A	3
	BP	GO:0030534	adult behavior	1.46974e-06	2.01564e-05	9.9586e-06	DRD2/OPRM1/APP/OPRK1/OPRD1	5
	BP	GO:0006836	neurotransmitter transport	1.52911e-06	2.07959e-05	1.02746e-05	HTR1A/DRD2/CNR1/CHRM2/GPER1/HTR1B	6
	BP	GO:0045187	regulation of circadian sleep/wake cycle, sleep	1.60935e-06	2.13533e-05	1.05499e-05	DRD2/ADORA1/MTNR1B	3
	BP	GO:0048243	norepinephrine secretion	1.60935e-06	2.13533e-05	1.05499e-05	ADRA2C/ADRA2B/ADRA2A	3
	BP	GO:0099509	regulation of presynaptic cytosolic calcium ion concentration	1.60935e-06	2.13533e-05	1.05499e-05	ADORA1/CNR1/HTR1B	3
	BP	GO:0002792	negative regulation of peptide secretion	1.68242e-06	2.21428e-05	1.094e-05	DRD2/MTNR1B/OPRM1/ANXA1/ADRA2A	5
	BP	GO:1903169	regulation of calcium ion transmembrane transport	1.85729e-06	2.42488e-05	1.19805e-05	CXCL10/DRD2/CXCL11/GPER1/ADRA2A	5
	BP	GO:0017156	calcium ion regulated exocytosis	2.04619e-06	2.6503e-05	1.30942e-05	DRD2/CNR1/CHRM2/ADRA2A/HTR1B	5
	BP	GO:0060402	calcium ion transport into cytosol	2.32125e-06	2.98289e-05	1.47375e-05	CXCL10/DRD2/CXCL11/GPER1/CCR7	5
	BP	GO:0002683	negative regulation of immune system process	2.41002e-06	3.07278e-05	1.51816e-05	CNR2/DRD2/ADORA1/GPR55/CNR1/GPER1/ANXA1	7
	BP	GO:0009410	response to xenobiotic stimulus	2.45985e-06	3.09988e-05	1.53155e-05	CNR2/DRD2/CNR1/OPRM1/OPRK1/HTR1B	6
	BP	GO:1903305	regulation of regulated secretory pathway	2.46927e-06	3.09988e-05	1.53155e-05	DRD2/CNR1/CHRM2/ADRA2A/HTR1B	5
	BP	GO:0051966	regulation of synaptic transmission, glutamatergic	2.54502e-06	3.17059e-05	1.56648e-05	DRD2/ADORA1/CNR1/HTR1B	4
	BP	GO:0048511	rhythmic process	2.60955e-06	3.22636e-05	1.59403e-05	DRD2/ADORA1/MTNR1A/MTNR1B/OPRM1/OPRK1	6
	BP	GO:0050802	circadian sleep/wake cycle, sleep	2.69055e-06	3.30149e-05	1.63115e-05	DRD2/ADORA1/MTNR1B	3
	BP	GO:0050805	negative regulation of synaptic transmission	2.85022e-06	3.47131e-05	1.71506e-05	CNR2/DRD2/ADORA1/HTR1B	4
	BP	GO:0070372	regulation of ERK1 and ERK2 cascade	2.87557e-06	3.47624e-05	1.71749e-05	DRD2/GPR55/OPRM1/GPER1/APP/CCR7	6
	BP	GO:0060326	cell chemotaxis	3.10397e-06	3.68357e-05	1.81993e-05	CNR2/CXCL10/CXCL11/CXCL8/CCR7/ANXA1	6
	BP	GO:0015874	norepinephrine transport	3.13608e-06	3.68357e-05	1.81993e-05	ADRA2C/ADRA2B/ADRA2A	3
	BP	GO:0042749	regulation of circadian sleep/wake cycle	3.13608e-06	3.68357e-05	1.81993e-05	DRD2/ADORA1/MTNR1B	3
	BP	GO:0050806	positive regulation of synaptic transmission	3.13735e-06	3.68357e-05	1.81993e-05	DRD2/ADORA1/CNR1/GPER1/APP	5
	BP	GO:0007269	neurotransmitter secretion	3.22996e-06	3.76521e-05	1.86026e-05	DRD2/CNR1/CHRM2/GPER1/HTR1B	5
	BP	GO:0050727	regulation of inflammatory response	3.27643e-06	3.7923e-05	1.87365e-05	CNR2/ADORA1/CNR1/GPER1/CCR7/C3/ANXA1	7
	BP	GO:0099643	signal release from synapse	3.32471e-06	3.82108e-05	1.88786e-05	DRD2/CNR1/CHRM2/GPER1/HTR1B	5
	BP	GO:0060401	cytosolic calcium ion transport	3.42163e-06	3.90497e-05	1.92931e-05	CXCL10/DRD2/CXCL11/GPER1/CCR7	5
	BP	GO:2000300	regulation of synaptic vesicle exocytosis	3.92954e-06	4.44674e-05	2.19698e-05	DRD2/CNR1/CHRM2/HTR1B	4
	BP	GO:0070371	ERK1 and ERK2 cascade	3.95084e-06	4.44674e-05	2.19698e-05	DRD2/GPR55/OPRM1/GPER1/APP/CCR7	6
	BP	GO:0022410	circadian sleep/wake cycle process	4.16823e-06	4.62758e-05	2.28633e-05	DRD2/ADORA1/MTNR1B	3
	BP	GO:0050995	negative regulation of lipid catabolic process	4.16823e-06	4.62758e-05	2.28633e-05	ADORA1/CNR1/ADRA2A	3
	BP	GO:0032103	positive regulation of response to external stimulus	4.40069e-06	4.85265e-05	2.39753e-05	CXCL10/CNR1/CXCL8/OPRM1/CCR7/C3	6
	BP	GO:0046677	response to antibiotic	4.72315e-06	5.17327e-05	2.55594e-05	DRD2/CNR1/OPRM1/OPRK1/ANXA1/HTR1B	6
	BP	GO:0002861	regulation of inflammatory response to antigenic stimulus	4.75929e-06	5.1781e-05	2.55832e-05	CNR1/CCR7/C3	3
	BP	GO:0051235	maintenance of location	4.97742e-06	5.37957e-05	2.65786e-05	CXCL10/DRD2/CXCL11/GPER1/CCR7/C3	6
	BP	GO:1902803	regulation of synaptic vesicle transport	5.28541e-06	5.67486e-05	2.80375e-05	DRD2/CNR1/CHRM2/HTR1B	4
	BP	GO:0042058	regulation of epidermal growth factor receptor signaling pathway	5.806e-06	6.19307e-05	3.05979e-05	ADORA1/GPER1/APP/ADRA2A	4
	BP	GO:0042745	circadian sleep/wake cycle	6.10242e-06	6.46698e-05	3.19511e-05	DRD2/ADORA1/MTNR1B	3
	BP	GO:0051224	negative regulation of protein transport	6.18004e-06	6.50699e-05	3.21488e-05	DRD2/MTNR1B/OPRM1/ANXA1/ADRA2A	5
	BP	GO:0070098	chemokine-mediated signaling pathway	6.36359e-06	6.65729e-05	3.28914e-05	CXCL10/CXCL11/CXCL8/CCR7	4
	BP	GO:1904950	negative regulation of establishment of protein localization	6.82912e-06	7.08461e-05	3.50027e-05	DRD2/MTNR1B/OPRM1/ANXA1/ADRA2A	5
	BP	GO:0007176	regulation of epidermal growth factor-activated receptor activity	6.85888e-06	7.08461e-05	3.50027e-05	ADORA1/APP/ADRA2A	3
	BP	GO:0007626	locomotory behavior	6.99945e-06	7.18434e-05	3.54954e-05	DRD2/OPRM1/APP/OPRK1/OPRD1	5
	BP	GO:0001505	regulation of neurotransmitter levels	7.44094e-06	7.58976e-05	3.74984e-05	HTR1A/DRD2/CNR1/CHRM2/GPER1/HTR1B	6
	BP	GO:0045833	negative regulation of lipid metabolic process	7.59635e-06	7.70015e-05	3.80438e-05	ADORA1/CNR1/GPER1/ADRA2A	4
	BP	GO:0035249	synaptic transmission, glutamatergic	7.93028e-06	7.94001e-05	3.92289e-05	DRD2/ADORA1/CNR1/HTR1B	4
	BP	GO:1901184	regulation of ERBB signaling pathway	7.93028e-06	7.94001e-05	3.92289e-05	ADORA1/GPER1/APP/ADRA2A	4
	BP	GO:0034764	positive regulation of transmembrane transport	8.09265e-06	8.05317e-05	3.9788e-05	CXCL10/CXCL11/GPER1/OPRK1/C3	5
	BP	GO:0097529	myeloid leukocyte migration	9.31537e-06	9.16204e-05	4.52665e-05	CXCL10/CXCL11/CXCL8/CCR7/ANXA1	5
	BP	GO:1990868	response to chemokine	9.37537e-06	9.16204e-05	4.52665e-05	CXCL10/CXCL11/CXCL8/CCR7	4
	BP	GO:1990869	cellular response to chemokine	9.37537e-06	9.16204e-05	4.52665e-05	CXCL10/CXCL11/CXCL8/CCR7	4
	BP	GO:0002675	positive regulation of acute inflammatory response	1.05015e-05	9.98094e-05	4.93125e-05	CNR1/CCR7/C3	3
	BP	GO:0019098	reproductive behavior	1.05015e-05	9.98094e-05	4.93125e-05	MTNR1A/APP/OPRK1	3
	BP	GO:0030431	sleep	1.05015e-05	9.98094e-05	4.93125e-05	DRD2/ADORA1/MTNR1B	3
	BP	GO:0045742	positive regulation of epidermal growth factor receptor signaling pathway	1.05015e-05	9.98094e-05	4.93125e-05	ADORA1/GPER1/ADRA2A	3
	BP	GO:0060079	excitatory postsynaptic potential	1.05803e-05	9.98094e-05	4.93125e-05	DRD2/ADORA1/OPRM1/APP	4
	BP	GO:2001023	regulation of response to drug	1.05803e-05	9.98094e-05	4.93125e-05	DRD2/CNR1/OPRK1/HTR1B	4
	BP	GO:0045745	positive regulation of G protein-coupled receptor signaling pathway	1.15772e-05	0.000108586	5.36486e-05	DRD2/GPER1/C3	3
	BP	GO:0002526	acute inflammatory response	1.16703e-05	0.000108834	5.3771e-05	ADORA1/CNR1/OPRM1/CCR7/C3	5
	BP	GO:0030593	neutrophil chemotaxis	1.236e-05	0.000114611	5.66252e-05	CXCL10/CXCL11/CXCL8/CCR7	4
	BP	GO:0042755	eating behavior	1.27231e-05	0.000116652	5.7634e-05	OPRM1/OPRK1/OPRD1	3
	BP	GO:1901186	positive regulation of ERBB signaling pathway	1.27231e-05	0.000116652	5.7634e-05	ADORA1/GPER1/ADRA2A	3
	BP	GO:0032148	activation of protein kinase B activity	1.39415e-05	0.000126403	6.24514e-05	ADRA2C/ADRA2B/ADRA2A	3
	BP	GO:0070050	neuron cellular homeostasis	1.39415e-05	0.000126403	6.24514e-05	ADORA1/CNR1/HTR1B	3
	BP	GO:0099565	chemical synaptic transmission, postsynaptic	1.43512e-05	0.000129399	6.39315e-05	DRD2/ADORA1/OPRM1/APP	4
	BP	GO:0072676	lymphocyte migration	1.59927e-05	0.000143407	7.08526e-05	CXCL10/CXCL11/APP/CCR7	4
	BP	GO:0098693	regulation of synaptic vesicle cycle	1.65694e-05	0.000147766	7.30063e-05	DRD2/CNR1/CHRM2/HTR1B	4
	BP	GO:0006813	potassium ion transport	1.77627e-05	0.000157548	7.7839e-05	DRD2/ADORA1/MTNR1B/OPRK1/ADRA2A	5
	BP	GO:0045777	positive regulation of blood pressure	1.80524e-05	0.000159006	7.85594e-05	ADORA1/CNR1/ADRA2B	3
	BP	GO:0042593	glucose homeostasis	1.8122e-05	0.000159006	7.85594e-05	MTNR1B/CNR1/GPER1/OPRK1/ADRA2A	5
	BP	GO:0033500	carbohydrate homeostasis	1.84869e-05	0.00016134	7.97126e-05	MTNR1B/CNR1/GPER1/OPRK1/ADRA2A	5
	BP	GO:0046676	negative regulation of insulin secretion	1.95817e-05	0.000169086	8.35397e-05	DRD2/MTNR1B/ADRA2A	3
	BP	GO:0051590	positive regulation of neurotransmitter transport	1.95817e-05	0.000169086	8.35397e-05	DRD2/CNR1/GPER1	3
	BP	GO:1990266	neutrophil migration	2.03568e-05	0.000174855	8.63897e-05	CXCL10/CXCL11/CXCL8/CCR7	4
	BP	GO:0007173	epidermal growth factor receptor signaling pathway	2.1045e-05	0.000178883	8.83799e-05	ADORA1/GPER1/APP/ADRA2A	4
	BP	GO:0016079	synaptic vesicle exocytosis	2.1045e-05	0.000178883	8.83799e-05	DRD2/CNR1/CHRM2/HTR1B	4
	BP	GO:0007618	mating	2.28911e-05	0.000192569	9.51417e-05	MTNR1A/CNR1/APP	3
	BP	GO:0051281	positive regulation of release of sequestered calcium ion into cytosol	2.28911e-05	0.000192569	9.51417e-05	CXCL10/CXCL11/GPER1	3
	BP	GO:0032412	regulation of ion transmembrane transporter activity	2.60943e-05	0.000218389	0.000107899	DRD2/MTNR1B/OPRM1/APP/ADRA2A	5
	BP	GO:0002687	positive regulation of leukocyte migration	2.80338e-05	0.000233424	0.000115327	CXCL10/CXCL8/APP/CCR7	4
	BP	GO:0009314	response to radiation	2.82658e-05	0.000234161	0.000115691	CXCL10/DRD2/OPRM1/APP/OPRK1/ANXA1	6
	BP	GO:0022898	regulation of transmembrane transporter activity	3.01705e-05	0.000248678	0.000122863	DRD2/MTNR1B/OPRM1/APP/ADRA2A	5
	BP	GO:0001508	action potential	3.2582e-05	0.000265712	0.000131279	CNR2/MTNR1B/CNR1/GPER1	4
	BP	GO:0090278	negative regulation of peptide hormone secretion	3.27255e-05	0.000265712	0.000131279	DRD2/MTNR1B/ADRA2A	3
	BP	GO:1900271	regulation of long-term synaptic potentiation	3.27255e-05	0.000265712	0.000131279	DRD2/ADORA1/APP	3
	BP	GO:0001819	positive regulation of cytokine production	3.44147e-05	0.000278044	0.000137372	DRD2/APP/CCR7/C3/ANXA1/ADRA2A	6
	BP	GO:0045776	negative regulation of blood pressure	3.49764e-05	0.000279811	0.000138245	DRD2/ADORA1/CNR1	3
	BP	GO:0048512	circadian behavior	3.49764e-05	0.000279811	0.000138245	DRD2/ADORA1/MTNR1B	3
	BP	GO:0007622	rhythmic behavior	3.73267e-05	0.000297157	0.000146815	DRD2/ADORA1/MTNR1B	3
	BP	GO:0050769	positive regulation of neurogenesis	3.87761e-05	0.000307197	0.000151776	ADRA2C/DRD2/CNR1/ADRA2B/OPRM1/GPER1	6
	BP	GO:0032409	regulation of transporter activity	3.91353e-05	0.000308545	0.000152442	DRD2/MTNR1B/OPRM1/APP/ADRA2A	5
	BP	GO:0043268	positive regulation of potassium ion transport	3.97783e-05	0.000311018	0.000153663	ADORA1/OPRK1/ADRA2A	3
	BP	GO:0060078	regulation of postsynaptic membrane potential	3.98301e-05	0.000311018	0.000153663	DRD2/ADORA1/OPRM1/APP	4
	BP	GO:0038127	ERBB signaling pathway	4.21016e-05	0.00032719	0.000161653	ADORA1/GPER1/APP/ADRA2A	4
	BP	GO:1904064	positive regulation of cation transmembrane transport	4.44667e-05	0.000343932	0.000169925	CXCL10/CXCL11/GPER1/OPRK1	4
	BP	GO:0097366	response to bronchodilator	4.7762e-05	0.000367677	0.000181657	CNR2/DRD2/CCR7	3
	BP	GO:0050890	cognition	4.84678e-05	0.000371359	0.000183476	DRD2/ADORA1/CNR1/APP/OPRK1	5
	BP	GO:0048489	synaptic vesicle transport	5.49095e-05	0.000416801	0.000205927	DRD2/CNR1/CHRM2/HTR1B	4
	BP	GO:0097480	establishment of synaptic vesicle localization	5.49095e-05	0.000416801	0.000205927	DRD2/CNR1/CHRM2/HTR1B	4
	BP	GO:0010524	positive regulation of calcium ion transport into cytosol	5.67304e-05	0.000426654	0.000210795	CXCL10/CXCL11/GPER1	3
	BP	GO:0050994	regulation of lipid catabolic process	5.67304e-05	0.000426654	0.000210795	ADORA1/CNR1/ADRA2A	3
	BP	GO:0098900	regulation of action potential	5.99479e-05	0.000448784	0.000221729	CNR2/MTNR1B/CNR1	3
	BP	GO:0034767	positive regulation of ion transmembrane transport	6.07544e-05	0.000452745	0.000223686	CXCL10/CXCL11/GPER1/OPRK1	4
	BP	GO:0002673	regulation of acute inflammatory response	6.54271e-05	0.00048535	0.000239795	ADORA1/CNR1/CCR7/C3	4
	BP	GO:0019229	regulation of vasoconstriction	7.0312e-05	0.000519227	0.000256532	ADRA2C/ADRA2B/ADRA2A	3
	BP	GO:0097479	synaptic vesicle localization	7.2059e-05	0.000529731	0.000261722	DRD2/CNR1/CHRM2/HTR1B	4
	BP	GO:0097755	positive regulation of blood vessel diameter	7.40103e-05	0.000541636	0.000267604	ADORA1/MTNR1B/GPER1	3
	BP	GO:0001820	serotonin secretion	8.33455e-05	0.000599206	0.000296048	HTR1A/HTR1B	2
	BP	GO:0042756	drinking behavior	8.33455e-05	0.000599206	0.000296048	DRD2/HTR1B	2
	BP	GO:0045741	positive regulation of epidermal growth factor-activated receptor activity	8.33455e-05	0.000599206	0.000296048	ADORA1/ADRA2A	2
	BP	GO:0048149	behavioral response to ethanol	8.33455e-05	0.000599206	0.000296048	DRD2/OPRM1	2
	BP	GO:0032147	activation of protein kinase activity	8.46653e-05	0.000606025	0.000299416	ADRA2C/DRD2/ADORA1/ADRA2B/ADRA2A	5
	BP	GO:0002695	negative regulation of leukocyte activation	9.49034e-05	0.000676342	0.000334158	CNR2/CNR1/GPER1/ANXA1	4
	BP	GO:0072678	T cell migration	9.88928e-05	0.000701709	0.000346691	CXCL10/CXCL11/APP	3
	BP	GO:2001257	regulation of cation channel activity	0.000101352	0.000716048	0.000353775	DRD2/MTNR1B/OPRM1/APP	4
	BP	GO:0008217	regulation of blood pressure	0.00011044	0.000776887	0.000383833	DRD2/ADORA1/CNR1/ADRA2B	4
	BP	GO:0006959	humoral immune response	0.00011592	0.000811936	0.00040115	CXCL10/CXCL11/CXCL8/CCR7/C3	5
	BP	GO:0051481	negative regulation of cytosolic calcium ion concentration	0.000122031	0.000851086	0.000420493	DRD2/MTNR1B	2
	BP	GO:1904427	positive regulation of calcium ion transmembrane transport	0.000128686	0.000893681	0.000441538	CXCL10/CXCL11/GPER1	3
	BP	GO:0061844	antimicrobial humoral immune response mediated by antimicrobial peptide	0.000139777	0.000966596	0.000477562	CXCL10/CXCL11/CXCL8	3
	BP	GO:0099504	synaptic vesicle cycle	0.000141262	0.000967746	0.000478131	DRD2/CNR1/CHRM2/HTR1B	4
	BP	GO:0001973	adenosine receptor signaling pathway	0.000144095	0.000967746	0.000478131	ADORA1/ADORA3	2
	BP	GO:0016322	neuron remodeling	0.000144095	0.000967746	0.000478131	APP/C3	2
	BP	GO:0033004	negative regulation of mast cell activation	0.000144095	0.000967746	0.000478131	CNR2/CNR1	2
	BP	GO:0045759	negative regulation of action potential	0.000144095	0.000967746	0.000478131	CNR2/CNR1	2
	BP	GO:0051001	negative regulation of nitric-oxide synthase activity	0.000144095	0.000967746	0.000478131	CNR2/CNR1	2
	BP	GO:1900272	negative regulation of long-term synaptic potentiation	0.000144095	0.000967746	0.000478131	ADORA1/APP	2
	BP	GO:0050866	negative regulation of cell activation	0.000155783	0.00104196	0.000514797	CNR2/CNR1/GPER1/ANXA1	4
	BP	GO:0008344	adult locomotory behavior	0.000163789	0.00109104	0.000539044	DRD2/APP/OPRD1	3
	BP	GO:0099171	presynaptic modulation of chemical synaptic transmission	0.000167966	0.00111431	0.000550545	CNR1/HTR1B	2
	BP	GO:0008306	associative learning	0.000170183	0.00111992	0.000553313	DRD2/APP/OPRK1	3
	BP	GO:0032413	negative regulation of ion transmembrane transporter activity	0.000170183	0.00111992	0.000553313	DRD2/MTNR1B/ADRA2A	3
	BP	GO:0071222	cellular response to lipopolysaccharide	0.000174603	0.00114439	0.000565402	CXCL10/CXCL11/CXCL8/OPRK1	4
	BP	GO:0099003	vesicle-mediated transport in synapse	0.000181227	0.00118305	0.000584503	DRD2/CNR1/CHRM2/HTR1B	4
	BP	GO:0007623	circadian rhythm	0.000184606	0.0012003	0.00059303	DRD2/ADORA1/MTNR1A/MTNR1B	4
	BP	GO:0042754	negative regulation of circadian rhythm	0.000193641	0.00125406	0.000619588	DRD2/ADORA1	2
	BP	GO:0051279	regulation of release of sequestered calcium ion into cytosol	0.00019738	0.00127322	0.000629054	CXCL10/CXCL11/GPER1	3
	BP	GO:0071219	cellular response to molecule of bacterial origin	0.000198579	0.00127591	0.000630384	CXCL10/CXCL11/CXCL8/OPRK1	4
	BP	GO:0015893	drug transport	0.000205846	0.00131741	0.000650889	DRD2/CNR1/OPRK1/HTR1B	4
	BP	GO:0006837	serotonin transport	0.000221115	0.00139868	0.000691041	HTR1A/HTR1B	2
	BP	GO:0044849	estrous cycle	0.000221115	0.00139868	0.000691041	OPRM1/OPRK1	2
	BP	GO:0045986	negative regulation of smooth muscle contraction	0.000221115	0.00139868	0.000691041	ADRA2C/ADORA1	2
	BP	GO:0060291	long-term synaptic potentiation	0.000227252	0.00143195	0.000707478	DRD2/ADORA1/APP	3
	BP	GO:0002690	positive regulation of leukocyte chemotaxis	0.000235151	0.00147603	0.000729254	CXCL10/CXCL8/CCR7	3
	BP	GO:0061097	regulation of protein tyrosine kinase activity	0.000243226	0.00152086	0.000751406	ADORA1/APP/ADRA2A	3
	BP	GO:0002031	G protein-coupled receptor internalization	0.000250382	0.0015537	0.000767632	DRD2/HTR1B	2
	BP	GO:0048521	negative regulation of behavior	0.000250382	0.0015537	0.000767632	DRD2/ADORA1	2
	BP	GO:0032410	negative regulation of transporter activity	0.000251478	0.00155459	0.000768072	DRD2/MTNR1B/ADRA2A	3
	BP	GO:1901342	regulation of vasculature development	0.00025605	0.00157688	0.000779082	CXCL10/CXCL8/GPER1/C3/ANXA1	5
	BP	GO:1904063	negative regulation of cation transmembrane transport	0.000268523	0.00164748	0.000813962	DRD2/MTNR1B/ADRA2A	3
	BP	GO:1904018	positive regulation of vasculature development	0.000271078	0.00165692	0.00081863	CXCL8/GPER1/C3/ANXA1	4
	BP	GO:0051047	positive regulation of secretion	0.000273315	0.00166437	0.000822307	DRD2/ADORA1/CNR1/GPER1/OPRK1	5
	BP	GO:0071216	cellular response to biotic stimulus	0.000298993	0.00181396	0.000896218	CXCL10/CXCL11/CXCL8/OPRK1	4
	BP	GO:0031348	negative regulation of defense response	0.0003137	0.00188568	0.000931651	CNR2/DRD2/ADORA1/GPER1	4
	BP	GO:0002922	positive regulation of humoral immune response	0.00031428	0.00188568	0.000931651	CCR7/C3	2
	BP	GO:0007213	G protein-coupled acetylcholine receptor signaling pathway	0.00031428	0.00188568	0.000931651	CHRM2/OPRM1	2
	BP	GO:0032769	negative regulation of monooxygenase activity	0.000348901	0.00207813	0.00102673	CNR2/CNR1	2
	BP	GO:0048148	behavioral response to cocaine	0.000348901	0.00207813	0.00102673	DRD2/OPRK1	2
	BP	GO:0010522	regulation of calcium ion transport into cytosol	0.000375682	0.00221377	0.00109375	CXCL10/CXCL11/GPER1	3
	BP	GO:0008016	regulation of heart contraction	0.000377766	0.00221377	0.00109375	DRD2/ADORA1/ADORA3/CHRM2	4
	BP	GO:0001956	positive regulation of neurotransmitter secretion	0.000385298	0.00221377	0.00109375	CNR1/GPER1	2
	BP	GO:0002029	desensitization of G protein-coupled receptor signaling pathway	0.000385298	0.00221377	0.00109375	DRD2/HTR1B	2
	BP	GO:0014821	phasic smooth muscle contraction	0.000385298	0.00221377	0.00109375	DRD2/HTR1D	2
	BP	GO:0022401	negative adaptation of signaling pathway	0.000385298	0.00221377	0.00109375	DRD2/HTR1B	2
	BP	GO:0035813	regulation of renal sodium excretion	0.000385298	0.00221377	0.00109375	DRD2/ADORA1	2
	BP	GO:0050951	sensory perception of temperature stimulus	0.000385298	0.00221377	0.00109375	ADORA1/OPRK1	2
	BP	GO:1900273	positive regulation of long-term synaptic potentiation	0.000385298	0.00221377	0.00109375	DRD2/APP	2
	BP	GO:0032652	regulation of interleukin-1 production	0.000386595	0.00221377	0.00109375	APP/CCR7/ANXA1	3
	BP	GO:0034766	negative regulation of ion transmembrane transport	0.000386595	0.00221377	0.00109375	DRD2/MTNR1B/ADRA2A	3
	BP	GO:0007218	neuropeptide signaling pathway	0.000397711	0.00226946	0.00112126	OPRM1/OPRK1/OPRD1	3
	BP	GO:0007611	learning or memory	0.000407045	0.00231463	0.00114358	DRD2/CNR1/APP/OPRK1	4
	BP	GO:0023058	adaptation of signaling pathway	0.000423465	0.00239963	0.00118558	DRD2/HTR1B	2
	BP	GO:0007617	mating behavior	0.000463397	0.00260781	0.00128843	MTNR1A/APP	2
	BP	GO:0035812	renal sodium excretion	0.000463397	0.00260781	0.00128843	DRD2/ADORA1	2
	BP	GO:0031623	receptor internalization	0.000481321	0.00269936	0.00133366	DRD2/CXCL8/HTR1B	3
	BP	GO:0035588	G protein-coupled purinergic receptor signaling pathway	0.000505092	0.00280378	0.00138525	ADORA1/ADORA3	2
	BP	GO:0044062	regulation of excretion	0.000505092	0.00280378	0.00138525	DRD2/ADORA1	2
	BP	GO:0090023	positive regulation of neutrophil chemotaxis	0.000505092	0.00280378	0.00138525	CXCL8/CCR7	2
	BP	GO:0002688	regulation of leukocyte chemotaxis	0.000520345	0.00286893	0.00141744	CXCL10/CXCL8/CCR7	3
	BP	GO:0042752	regulation of circadian rhythm	0.000520345	0.00286893	0.00141744	DRD2/ADORA1/MTNR1B	3
	BP	GO:0032612	interleukin-1 production	0.000533791	0.00293315	0.00144917	APP/CCR7/ANXA1	3
	BP	GO:0060047	heart contraction	0.000570628	0.00312505	0.00154398	DRD2/ADORA1/ADORA3/CHRM2	4
	BP	GO:0010996	response to auditory stimulus	0.000593746	0.00321925	0.00159052	CXCL10/DRD2	2
	BP	GO:0048169	regulation of long-term neuronal synaptic plasticity	0.000593746	0.00321925	0.00159052	DRD2/APP	2
	BP	GO:0071624	positive regulation of granulocyte chemotaxis	0.000593746	0.00321925	0.00159052	CXCL8/CCR7	2
	BP	GO:0019730	antimicrobial humoral response	0.000634179	0.00342709	0.00169321	CXCL10/CXCL11/CXCL8	3
	BP	GO:0045932	negative regulation of muscle contraction	0.000640697	0.00343953	0.00169936	ADRA2C/ADORA1	2
	BP	GO:0060259	regulation of feeding behavior	0.000640697	0.00343953	0.00169936	CNR1/OPRK1	2
	BP	GO:0051928	positive regulation of calcium ion transport	0.000649435	0.00346033	0.00170963	CXCL10/CXCL11/GPER1	3
	BP	GO:0003015	heart process	0.000650933	0.00346033	0.00170963	DRD2/ADORA1/ADORA3/CHRM2	4
	BP	GO:0051650	establishment of vesicle localization	0.000650933	0.00346033	0.00170963	DRD2/CNR1/CHRM2/HTR1B	4
	BP	GO:0046717	acid secretion	0.000664923	0.00352323	0.00174071	DRD2/ADORA1/ANXA1	3
	BP	GO:0010818	T cell chemotaxis	0.000689391	0.00359453	0.00177593	CXCL10/CXCL11	2
	BP	GO:0048520	positive regulation of behavior	0.000689391	0.00359453	0.00177593	MTNR1B/OPRK1	2
	BP	GO:0095500	acetylcholine receptor signaling pathway	0.000689391	0.00359453	0.00177593	CHRM2/OPRM1	2
	BP	GO:1903831	signal transduction involved in cellular response to ammonium ion	0.000689391	0.00359453	0.00177593	CHRM2/OPRM1	2
	BP	GO:2001025	positive regulation of response to drug	0.000689391	0.00359453	0.00177593	DRD2/OPRK1	2
	BP	GO:0034763	negative regulation of transmembrane transport	0.000729234	0.00379016	0.00187259	DRD2/MTNR1B/ADRA2A	3
	BP	GO:1902624	positive regulation of neutrophil migration	0.000739824	0.00383299	0.00189375	CXCL8/CCR7	2
	BP	GO:0090022	regulation of neutrophil chemotaxis	0.00079199	0.00406455	0.00200816	CXCL8/CCR7	2
	BP	GO:1905144	response to acetylcholine	0.00079199	0.00406455	0.00200816	CHRM2/OPRM1	2
	BP	GO:1905145	cellular response to acetylcholine	0.00079199	0.00406455	0.00200816	CHRM2/OPRM1	2
	BP	GO:0051648	vesicle localization	0.000795686	0.00407072	0.0020112	DRD2/CNR1/CHRM2/HTR1B	4
	BP	GO:0071333	cellular response to glucose stimulus	0.000815036	0.00415669	0.00205368	GPER1/OPRK1/ADRA2A	3
	BP	GO:0050482	arachidonic acid secretion	0.000845886	0.00427372	0.0021115	DRD2/ANXA1	2
	BP	GO:1903963	arachidonate transport	0.000845886	0.00427372	0.0021115	DRD2/ANXA1	2
	BP	GO:2000406	positive regulation of T cell migration	0.000845886	0.00427372	0.0021115	CXCL10/APP	2
	BP	GO:0050921	positive regulation of chemotaxis	0.000851078	0.00427372	0.0021115	CXCL10/CXCL8/CCR7	3
	BP	GO:0071331	cellular response to hexose stimulus	0.000851078	0.00427372	0.0021115	GPER1/OPRK1/ADRA2A	3
	BP	GO:0071326	cellular response to monosaccharide stimulus	0.000869473	0.0043527	0.00215052	GPER1/OPRK1/ADRA2A	3
	BP	GO:0006898	receptor-mediated endocytosis	0.000896964	0.00444489	0.00219607	DRD2/CXCL8/C3/HTR1B	4
	BP	GO:0001975	response to amphetamine	0.000901507	0.00444489	0.00219607	CNR2/DRD2	2
	BP	GO:0035587	purinergic receptor signaling pathway	0.000901507	0.00444489	0.00219607	ADORA1/ADORA3	2
	BP	GO:0045987	positive regulation of smooth muscle contraction	0.000901507	0.00444489	0.00219607	ADRA2B/GPER1	2
	BP	GO:0051385	response to mineralocorticoid	0.000901507	0.00444489	0.00219607	GPER1/HTR1B	2
	BP	GO:2001024	negative regulation of response to drug	0.000958848	0.00471337	0.00232872	DRD2/CNR1	2
	BP	GO:0019228	neuronal action potential	0.0010179	0.00497371	0.00245734	MTNR1B/GPER1	2
	BP	GO:0045920	negative regulation of exocytosis	0.0010179	0.00497371	0.00245734	ANXA1/ADRA2A	2
	BP	GO:0071322	cellular response to carbohydrate stimulus	0.0010258	0.00499733	0.00246901	GPER1/OPRK1/ADRA2A	3
	BP	GO:0007612	learning	0.00104651	0.00508303	0.00251135	DRD2/APP/OPRK1	3
	BP	GO:0045834	positive regulation of lipid metabolic process	0.00106748	0.00516244	0.00255059	ADORA1/CCR7/ANXA1	3
	BP	GO:0051354	negative regulation of oxidoreductase activity	0.00107867	0.00516244	0.00255059	CNR2/CNR1	2
	BP	GO:0051954	positive regulation of amine transport	0.00107867	0.00516244	0.00255059	DRD2/OPRK1	2
	BP	GO:0071312	cellular response to alkaloid	0.00107867	0.00516244	0.00255059	OPRM1/HTR1B	2
	BP	GO:0098801	regulation of renal system process	0.00107867	0.00516244	0.00255059	DRD2/ADORA1	2
	BP	GO:1901020	negative regulation of calcium ion transmembrane transporter activity	0.00114115	0.00541381	0.00267478	DRD2/ADRA2A	2
	BP	GO:1902622	regulation of neutrophil migration	0.00114115	0.00541381	0.00267478	CXCL8/CCR7	2
	BP	GO:2000310	regulation of NMDA receptor activity	0.00114115	0.00541381	0.00267478	OPRM1/APP	2
	BP	GO:0001678	cellular glucose homeostasis	0.0011989	0.00566884	0.00280078	GPER1/OPRK1/ADRA2A	3
	BP	GO:0032941	secretion by tissue	0.00120532	0.00566884	0.00280078	ADORA1/OPRK1	2
	BP	GO:2000403	positive regulation of lymphocyte migration	0.00120532	0.00566884	0.00280078	CXCL10/APP	2
	BP	GO:0030168	platelet activation	0.00122176	0.00569688	0.00281463	ADRA2C/ADRA2B/ADRA2A	3
	BP	GO:0050729	positive regulation of inflammatory response	0.00122176	0.00569688	0.00281463	CNR1/CCR7/C3	3
	BP	GO:0062013	positive regulation of small molecule metabolic process	0.00122176	0.00569688	0.00281463	GPER1/APP/ANXA1	3
	BP	GO:0042417	dopamine metabolic process	0.00133877	0.00622469	0.00307541	HTR1A/DRD2	2
	BP	GO:0031960	response to corticosteroid	0.0014399	0.00667588	0.00329833	GPER1/ANXA1/HTR1B	3
	BP	GO:1903170	negative regulation of calcium ion transmembrane transport	0.00147896	0.00683759	0.00337822	DRD2/ADRA2A	2
	BP	GO:0045862	positive regulation of proteolysis	0.0014978	0.0069051	0.00341158	GPER1/APP/C3/ADRA2A	4
	BP	GO:0032102	negative regulation of response to external stimulus	0.00152833	0.00702602	0.00347132	CNR2/DRD2/ADORA1/GPER1	4
	BP	GO:0033003	regulation of mast cell activation	0.00155158	0.00711288	0.00351423	CNR2/CNR1	2
	BP	GO:0035690	cellular response to drug	0.0015907	0.00727179	0.00359274	CHRM2/OPRM1/ANXA1/HTR1B	4
	BP	GO:0050728	negative regulation of inflammatory response	0.00162548	0.00741001	0.00366103	CNR2/ADORA1/GPER1	3
	BP	GO:0007212	dopamine receptor signaling pathway	0.00170185	0.00769367	0.00380118	DRD2/OPRM1	2
	BP	GO:0071622	regulation of granulocyte chemotaxis	0.00170185	0.00769367	0.00380118	CXCL8/CCR7	2
	BP	GO:2000404	regulation of T cell migration	0.00170185	0.00769367	0.00380118	CXCL10/APP	2
	BP	GO:0032874	positive regulation of stress-activated MAPK cascade	0.00170939	0.00770644	0.00380749	APP/OPRK1/CCR7	3
	BP	GO:0001659	temperature homeostasis	0.00173796	0.00779217	0.00384984	DRD2/ADORA1/CNR1	3
	BP	GO:0070304	positive regulation of stress-activated protein kinase signaling cascade	0.00173796	0.00779217	0.00384984	APP/OPRK1/CCR7	3
	BP	GO:0032309	icosanoid secretion	0.00177948	0.00795647	0.00393102	DRD2/ANXA1	2
	BP	GO:0045765	regulation of angiogenesis	0.00182304	0.00812898	0.00401625	CXCL10/CXCL8/C3/ANXA1	4
	BP	GO:0014075	response to amine	0.00185878	0.00826573	0.00408382	CNR2/DRD2	2
	BP	GO:0048771	tissue remodeling	0.00191564	0.00849546	0.00419732	GPR55/ANXA1/HTR1B	3
	BP	GO:0045787	positive regulation of cell cycle	0.0019295	0.00853373	0.00421623	DRD2/GPER1/APP/ANXA1	4
	BP	GO:0042551	neuron maturation	0.00193973	0.00855578	0.00422712	APP/C3	2
	BP	GO:0008038	neuron recognition	0.00202234	0.0088484	0.00437169	CNR1/APP	2
	BP	GO:0008542	visual learning	0.00202234	0.0088484	0.00437169	DRD2/APP	2
	BP	GO:0045933	positive regulation of muscle contraction	0.00202234	0.0088484	0.00437169	ADRA2B/GPER1	2
	BP	GO:0035094	response to nicotine	0.00210659	0.00914351	0.0045175	DRD2/CNR1	2
	BP	GO:0071715	icosanoid transport	0.00210659	0.00914351	0.0045175	DRD2/ANXA1	2
	BP	GO:1901571	fatty acid derivative transport	0.00210659	0.00914351	0.0045175	DRD2/ANXA1	2
	BP	GO:1903532	positive regulation of secretion by cell	0.00211644	0.00916189	0.00452658	DRD2/CNR1/GPER1/OPRK1	4
	BP	GO:0048167	regulation of synaptic plasticity	0.00216967	0.00936748	0.00462815	DRD2/ADORA1/APP	3
	BP	GO:0048260	positive regulation of receptor-mediated endocytosis	0.00228003	0.00976644	0.00482526	DRD2/C3	2
	BP	GO:0050999	regulation of nitric-oxide synthase activity	0.00228003	0.00976644	0.00482526	CNR2/CNR1	2
	BP	GO:2001258	negative regulation of cation channel activity	0.00228003	0.00976644	0.00482526	DRD2/MTNR1B	2
	BP	GO:0007565	female pregnancy	0.0023386	0.00996502	0.00492338	ADRA2C/CNR1/ADRA2B	3
	BP	GO:0043112	receptor metabolic process	0.0023386	0.00996502	0.00492338	DRD2/CXCL8/HTR1B	3
	CC	GO:0099056	integral component of presynaptic membrane	3.52115e-14	5.14087e-12	2.4092e-12	DRD2/ADORA1/CNR1/CHRM2/OPRM1/OPRK1/OPRD1/HTR1B	8
	CC	GO:0098889	intrinsic component of presynaptic membrane	9.26807e-14	6.76569e-12	3.17066e-12	DRD2/ADORA1/CNR1/CHRM2/OPRM1/OPRK1/OPRD1/HTR1B	8
	CC	GO:0099699	integral component of synaptic membrane	2.11548e-13	1.02954e-11	4.82479e-12	ADRA2C/DRD2/ADORA1/CNR1/CHRM2/OPRM1/OPRK1/OPRD1/HTR1B	9
	CC	GO:0042734	presynaptic membrane	3.57408e-13	1.23462e-11	5.78588e-12	DRD2/ADORA1/CNR1/CHRM2/OPRM1/GPER1/OPRK1/OPRD1/HTR1B	9
	CC	GO:0099240	intrinsic component of synaptic membrane	4.22814e-13	1.23462e-11	5.78588e-12	ADRA2C/DRD2/ADORA1/CNR1/CHRM2/OPRM1/OPRK1/OPRD1/HTR1B	9
	CC	GO:0150034	distal axon	1.47315e-12	3.58467e-11	1.67991e-11	ADRA2C/DRD2/ADORA1/CNR1/CHRM2/GPER1/APP/OPRK1/OPRD1/HTR1B	10
	CC	GO:0043679	axon terminus	1.97876e-12	4.12712e-11	1.93412e-11	ADRA2C/DRD2/ADORA1/CHRM2/GPER1/OPRK1/OPRD1/HTR1B	8
	CC	GO:0097060	synaptic membrane	2.82973e-12	5.16427e-11	2.42017e-11	ADRA2C/DRD2/ADORA1/CNR1/CHRM2/OPRM1/GPER1/OPRK1/ANXA1/OPRD1/HTR1B	11
	CC	GO:0044306	neuron projection terminus	6.5912e-12	1.06924e-10	5.01085e-11	ADRA2C/DRD2/ADORA1/CHRM2/GPER1/OPRK1/OPRD1/HTR1B	8
	CC	GO:0098793	presynapse	1.12678e-11	1.6451e-10	7.70957e-11	ADRA2C/DRD2/ADORA1/CNR1/CHRM2/OPRM1/GPER1/APP/OPRK1/OPRD1/HTR1B	11
	CC	GO:0033267	axon part	2.67102e-11	3.54517e-10	1.6614e-10	ADRA2C/DRD2/ADORA1/CNR1/CHRM2/GPER1/APP/OPRK1/OPRD1/HTR1B	10
	CC	GO:0099055	integral component of postsynaptic membrane	1.29466e-10	1.57517e-09	7.38182e-10	ADRA2C/DRD2/ADORA1/CHRM2/OPRM1/OPRK1/OPRD1	7
	CC	GO:0098936	intrinsic component of postsynaptic membrane	1.7412e-10	1.9555e-09	9.16423e-10	ADRA2C/DRD2/ADORA1/CHRM2/OPRM1/OPRK1/OPRD1	7
	CC	GO:0043197	dendritic spine	7.24556e-08	7.55608e-07	3.54106e-07	DRD2/ADORA1/OPRM1/GPER1/APP/OPRD1	6
	CC	GO:0044309	neuron spine	7.77016e-08	7.56296e-07	3.54429e-07	DRD2/ADORA1/OPRM1/GPER1/APP/OPRD1	6
	CC	GO:0045211	postsynaptic membrane	1.49376e-07	1.36305e-06	6.38777e-07	ADRA2C/DRD2/ADORA1/CHRM2/OPRM1/OPRK1/OPRD1	7
	CC	GO:0043025	neuronal cell body	1.61412e-07	1.38625e-06	6.49647e-07	ADRA2C/CNR2/DRD2/ADORA1/CHRM2/OPRM1/APP/OPRK1	8
	CC	GO:0043204	perikaryon	7.88931e-07	6.39911e-06	2.99886e-06	CNR2/DRD2/OPRM1/APP/OPRK1	5
	CC	GO:0032589	neuron projection membrane	8.94679e-07	6.8749e-06	3.22184e-06	ADORA1/OPRM1/GPER1/OPRD1	4
	CC	GO:0032279	asymmetric synapse	3.51995e-06	2.56956e-05	1.20419e-05	ADRA2C/DRD2/ADORA1/CHRM2/GPER1/OPRD1	6
	CC	GO:0098984	neuron to neuron synapse	5.11186e-06	3.55396e-05	1.66552e-05	ADRA2C/DRD2/ADORA1/CHRM2/GPER1/OPRD1	6
	CC	GO:0032590	dendrite membrane	1.94699e-05	0.000129209	6.05522e-05	OPRM1/GPER1/OPRD1	3
	CC	GO:0014069	postsynaptic density	5.75413e-05	0.000365262	0.000171176	ADRA2C/DRD2/ADORA1/GPER1/OPRD1	5
	CC	GO:0031256	leading edge membrane	6.87629e-05	0.000418307	0.000196034	ADORA1/OPRM1/GPER1/OPRD1	4
	CC	GO:0031253	cell projection membrane	7.74512e-05	0.000452315	0.000211972	DRD2/ADORA1/OPRM1/GPER1/OPRD1	5
	CC	GO:0099572	postsynaptic specialization	8.06816e-05	0.000453058	0.00021232	ADRA2C/DRD2/ADORA1/GPER1/OPRD1	5
	CC	GO:0008021	synaptic vesicle	0.000107956	0.000571585	0.000267866	DRD2/APP/OPRK1/OPRD1	4
	CC	GO:0048786	presynaptic active zone	0.000109619	0.000571585	0.000267866	ADORA1/GPER1/APP	3
	CC	GO:0070382	exocytic vesicle	0.000147181	0.000740979	0.00034725	DRD2/APP/OPRK1/OPRD1	4
	CC	GO:0031252	cell leading edge	0.00016061	0.000781636	0.000366304	ADORA1/OPRM1/GPER1/APP/OPRD1	5
	CC	GO:0030672	synaptic vesicle membrane	0.000339332	0.0015482	0.000725546	DRD2/OPRK1/OPRD1	3
	CC	GO:0099501	exocytic vesicle membrane	0.000339332	0.0015482	0.000725546	DRD2/OPRK1/OPRD1	3
	CC	GO:0044305	calyx of Held	0.000453326	0.00200562	0.000939911	ADORA1/HTR1B	2
	CC	GO:0045121	membrane raft	0.000723829	0.00305538	0.00143186	CNR1/OPRM1/APP/OPRD1	4
	CC	GO:0098857	membrane microdomain	0.000732454	0.00305538	0.00143186	CNR1/OPRM1/APP/OPRD1	4
	CC	GO:0098589	membrane region	0.000841727	0.00341367	0.00159977	CNR1/OPRM1/APP/OPRD1	4
	CC	GO:0030285	integral component of synaptic vesicle membrane	0.000913996	0.00360658	0.00169018	OPRK1/OPRD1	2
	CC	GO:0043198	dendritic shaft	0.00102475	0.0039372	0.00184512	GPER1/APP	2
	CC	GO:0098978	glutamatergic synapse	0.00106	0.00396819	0.00185964	ADRA2C/DRD2/CNR1/CHRM2	4
	CC	GO:0030133	transport vesicle	0.00162657	0.005937	0.0027823	DRD2/APP/OPRK1/OPRD1	4
	CC	GO:0098563	intrinsic component of synaptic vesicle membrane	0.00174275	0.00620588	0.00290831	OPRK1/OPRD1	2
	CC	GO:0099061	integral component of postsynaptic density membrane	0.00197011	0.00684848	0.00320945	ADRA2C/OPRD1	2
	CC	GO:0099146	intrinsic component of postsynaptic density membrane	0.0022108	0.00750643	0.00351779	ADRA2C/OPRD1	2
	CC	GO:0030658	transport vesicle membrane	0.00251555	0.00828071	0.00388065	DRD2/OPRK1/OPRD1	3
	CC	GO:0016328	lateral plasma membrane	0.00255227	0.00828071	0.00388065	DRD2/ANXA1	2
	CC	GO:0031301	integral component of organelle membrane	0.0027264	0.00865337	0.00405529	CNR1/OPRK1/OPRD1	3
	CC	GO:0016323	basolateral plasma membrane	0.00283581	0.00880911	0.00412828	ADORA1/ANXA1/ADRA2A	3
	MF	GO:0008227	G protein-coupled amine receptor activity	1.38855e-14	1.31913e-12	3.94642e-13	HTR1A/ADRA2C/DRD2/HTR1D/ADRA2B/CHRM2/ADRA2A/HTR1B	8
	MF	GO:0030594	neurotransmitter receptor activity	2.73007e-10	1.29678e-08	3.87957e-09	HTR1A/DRD2/ADORA1/HTR1D/CHRM2/OPRM1/HTR1B	7
	MF	GO:0099528	G protein-coupled neurotransmitter receptor activity	3.29046e-09	1.04198e-07	3.11728e-08	HTR1A/HTR1D/CHRM2/OPRM1/HTR1B	5
	MF	GO:0004935	adrenergic receptor activity	8.59724e-09	2.04184e-07	6.10856e-08	ADRA2C/DRD2/ADRA2B/ADRA2A	4
	MF	GO:1901338	catecholamine binding	1.74493e-08	3.31537e-07	9.91857e-08	ADRA2C/DRD2/ADRA2B/ADRA2A	4
	MF	GO:0001664	G protein-coupled receptor binding	1.17106e-07	1.85418e-06	5.54714e-07	ADRA2C/CXCL10/ADORA1/CXCL11/CXCL8/C3/ADRA2A	7
	MF	GO:0004993	G protein-coupled serotonin receptor activity	1.64712e-07	1.95596e-06	5.85163e-07	HTR1A/HTR1D/CHRM2/HTR1B	4
	MF	GO:0099589	serotonin receptor activity	1.64712e-07	1.95596e-06	5.85163e-07	HTR1A/HTR1D/CHRM2/HTR1B	4
	MF	GO:0045236	CXCR chemokine receptor binding	4.60887e-07	4.86492e-06	1.45543e-06	CXCL10/CXCL11/CXCL8	3
	MF	GO:0042923	neuropeptide binding	5.58233e-06	5.30322e-05	1.58656e-05	OPRM1/OPRK1/OPRD1	3
	MF	GO:0005245	voltage-gated calcium channel activity	4.66006e-05	0.000392599	0.000117453	CNR1/OPRM1/HTR1B	3
	MF	GO:0008009	chemokine activity	4.95914e-05	0.000392599	0.000117453	CXCL10/CXCL11/CXCL8	3
	MF	GO:0008528	G protein-coupled peptide receptor activity	5.77048e-05	0.000421689	0.000126156	OPRM1/OPRK1/CCR7/OPRD1	4
	MF	GO:0001653	peptide receptor activity	6.74987e-05	0.000458027	0.000137027	OPRM1/OPRK1/CCR7/OPRD1	4
	MF	GO:0043176	amine binding	9.27276e-05	0.00055057	0.000164713	HTR1A/HTR1B	2
	MF	GO:0051378	serotonin binding	9.27276e-05	0.00055057	0.000164713	HTR1A/HTR1B	2
	MF	GO:0042379	chemokine receptor binding	0.000121148	0.000677002	0.000202538	CXCL10/CXCL11/CXCL8	3
	MF	GO:0070405	ammonium ion binding	0.000177209	0.000935271	0.000279804	HTR1A/DRD2/HTR1B	3
	MF	GO:0031690	adrenergic receptor binding	0.00034951	0.00174755	0.000522813	ADRA2C/ADRA2A	2
	MF	GO:0033612	receptor serine/threonine kinase binding	0.000609861	0.0027589	0.000825376	OPRK1/OPRD1	2
	MF	GO:0035586	purinergic receptor activity	0.000609861	0.0027589	0.000825376	ADORA1/ADORA3	2
	MF	GO:0005262	calcium channel activity	0.00075793	0.00327288	0.000979144	CNR1/OPRM1/HTR1B	3
	MF	GO:0015085	calcium ion transmembrane transporter activity	0.00108003	0.00446097	0.00133459	CNR1/OPRM1/HTR1B	3
	MF	GO:0022843	voltage-gated cation channel activity	0.00114865	0.00454674	0.00136024	CNR1/OPRM1/HTR1B	3
	MF	GO:0008201	heparin binding	0.00189263	0.00719199	0.00215162	CXCL10/CXCL11/APP	3
	MF	GO:0005244	voltage-gated ion channel activity	0.0029248	0.0099689	0.00298238	CNR1/OPRM1/HTR1B	3
	MF	GO:0022832	voltage-gated channel activity	0.0029248	0.0099689	0.00298238	CNR1/OPRM1/HTR1B	3
	MF	GO:0042165	neurotransmitter binding	0.0029382	0.0099689	0.00298238	HTR1A/HTR1B	2
Module 2	BP	GO:0003018	vascular process in circulatory system	2.99419e-26	5.9191e-23	1.91664e-23	OXTR/ADRA1B/EDN1/EDNRA/ADRA1A/INS/HTR2B/HMOX1/VEGFA/HRH1/HTR2A/ICAM1/PTGS2/AKT1/CHRM3/NOS3/EDN2/EGFR	18
	BP	GO:0035296	regulation of tube diameter	8.72907e-26	5.9191e-23	1.91664e-23	OXTR/ADRA1B/EDN1/EDNRA/ADRA1A/INS/HTR2B/HMOX1/HRH1/HTR2A/ICAM1/PTGS2/AKT1/CHRM3/NOS3/EDN2/EGFR	17
	BP	GO:0050880	regulation of blood vessel size	8.72907e-26	5.9191e-23	1.91664e-23	OXTR/ADRA1B/EDN1/EDNRA/ADRA1A/INS/HTR2B/HMOX1/HRH1/HTR2A/ICAM1/PTGS2/AKT1/CHRM3/NOS3/EDN2/EGFR	17
	BP	GO:0097746	regulation of blood vessel diameter	8.72907e-26	5.9191e-23	1.91664e-23	OXTR/ADRA1B/EDN1/EDNRA/ADRA1A/INS/HTR2B/HMOX1/HRH1/HTR2A/ICAM1/PTGS2/AKT1/CHRM3/NOS3/EDN2/EGFR	17
	BP	GO:0035150	regulation of tube size	9.88493e-26	5.9191e-23	1.91664e-23	OXTR/ADRA1B/EDN1/EDNRA/ADRA1A/INS/HTR2B/HMOX1/HRH1/HTR2A/ICAM1/PTGS2/AKT1/CHRM3/NOS3/EDN2/EGFR	17
	BP	GO:0097756	negative regulation of blood vessel diameter	1.499e-25	7.47999e-23	2.42206e-23	OXTR/ADRA1B/EDN1/EDNRA/ADRA1A/INS/HTR2B/HRH1/HTR2A/ICAM1/PTGS2/AKT1/CHRM3/EDN2/EGFR	15
	BP	GO:0042310	vasoconstriction	4.66616e-24	1.99578e-21	6.46245e-22	OXTR/ADRA1B/EDN1/EDNRA/ADRA1A/HTR2B/HRH1/HTR2A/ICAM1/PTGS2/AKT1/CHRM3/EDN2/EGFR	14
	BP	GO:0019229	regulation of vasoconstriction	2.46824e-21	9.23737e-19	2.99111e-19	OXTR/ADRA1B/EDN1/ADRA1A/HRH1/HTR2A/ICAM1/PTGS2/AKT1/CHRM3/EDN2/EGFR	12
	BP	GO:1903524	positive regulation of blood circulation	4.97625e-20	1.65543e-17	5.36038e-18	OXTR/ADRA1B/EDN1/ADRA1A/HRH1/HTR2A/ICAM1/PTGS2/AKT1/CHRM3/EDN2/EGFR	12
	BP	GO:0045907	positive regulation of vasoconstriction	6.48395e-20	1.94129e-17	6.28602e-18	OXTR/ADRA1B/ADRA1A/HRH1/HTR2A/ICAM1/PTGS2/AKT1/CHRM3/EGFR	10
	BP	GO:0006979	response to oxidative stress	3.52291e-17	9.58871e-15	3.10488e-15	TP53/TNF/EDN1/STAT1/INS/CASP3/HMOX1/MAPK1/JUN/FOS/MAPK3/PTGS2/AKT1/NOS3/MMP9/IL6/EGFR	17
	BP	GO:1903522	regulation of blood circulation	4.9816e-17	1.24291e-14	4.02461e-15	OXTR/OXT/ADRA1B/EDN1/ADRA1A/IL2/HRH1/HTR2A/ICAM1/PTGS2/AKT1/CHRM3/NOS3/EDN2/EGFR	15
	BP	GO:0000302	response to reactive oxygen species	5.48219e-17	1.26259e-14	4.08834e-15	TNF/EDN1/STAT1/CASP3/HMOX1/MAPK1/JUN/FOS/MAPK3/AKT1/NOS3/MMP9/IL6/EGFR	14
	BP	GO:0070371	ERK1 and ERK2 cascade	1.31815e-16	2.81896e-14	9.12794e-15	EGF/OXTR/TNF/HTR2C/ADRA1A/HTR2B/MAPK1/CCL2/JUN/HTR2A/ICAM1/MAPK3/MYC/IGF1/EGFR	15
	BP	GO:0048661	positive regulation of smooth muscle cell proliferation	2.4712e-16	4.93251e-14	1.59717e-14	TNF/EDN1/STAT1/HMOX1/JUN/IGF1/PTGS2/AKT1/MMP9/IL6/EGFR	11
	BP	GO:0050673	epithelial cell proliferation	5.2919e-16	9.90248e-14	3.20648e-14	TNF/ESR1/STAT1/HTR2B/CCND1/HMOX1/VEGFA/MAPK1/CCL2/STAT3/JUN/MYC/AR/IGF1/AKT1/EGFR	16
	BP	GO:0006939	smooth muscle contraction	6.53812e-16	1.15148e-13	3.72855e-14	OXTR/OXT/ADRA1B/EDN1/EDNRA/ADRA1A/HTR2B/HTR2A/PTGS2/CHRM3/EDN2	11
	BP	GO:0045987	positive regulation of smooth muscle contraction	3.26631e-15	5.17303e-13	1.67505e-13	OXTR/OXT/ADRA1B/EDN1/ADRA1A/PTGS2/CHRM3/EDN2	8
	BP	GO:0033002	muscle cell proliferation	3.28282e-15	5.17303e-13	1.67505e-13	TNF/EDN1/STAT1/HMOX1/MAPK1/STAT3/JUN/IGF1/PTGS2/AKT1/MMP9/IL6/EGFR	13
	BP	GO:0071276	cellular response to cadmium ion	1.18923e-14	1.78028e-12	5.76465e-13	HMOX1/MAPK1/JUN/FOS/MAPK3/AKT1/MMP9/EGFR	8
	BP	GO:0051090	regulation of DNA-binding transcription factor activity	1.27863e-14	1.82296e-12	5.90284e-13	TNF/EDN1/ESR1/INS/HMOX1/VEGFA/MAPK1/STAT3/JUN/FOS/ICAM1/MAPK3/AR/AKT1/IL6	15
	BP	GO:0014065	phosphatidylinositol 3-kinase signaling	1.84841e-14	2.51552e-12	8.14541e-13	TNF/EDN1/INS/HTR2B/MAPK1/F2/HTR2A/MAPK3/IGF1/AKT1/EGFR	11
	BP	GO:0050678	regulation of epithelial cell proliferation	4.84074e-14	6.30138e-12	2.04042e-12	TNF/STAT1/HTR2B/CCND1/HMOX1/VEGFA/CCL2/STAT3/JUN/MYC/AR/IGF1/AKT1/EGFR	14
	BP	GO:0050890	cognition	5.19885e-14	6.48556e-12	2.10006e-12	OXTR/OXT/TNF/INS/CASP3/MAPK1/HRH1/JUN/FOS/HTR2A/CHRM1/PTGS2/EGFR	13
	BP	GO:0034599	cellular response to oxidative stress	6.72565e-14	8.05464e-12	2.60814e-12	TP53/TNF/INS/HMOX1/MAPK1/JUN/FOS/MAPK3/AKT1/NOS3/MMP9/IL6/EGFR	13
	BP	GO:0048660	regulation of smooth muscle cell proliferation	8.08511e-14	9.31032e-12	3.01473e-12	TNF/EDN1/STAT1/HMOX1/JUN/IGF1/PTGS2/AKT1/MMP9/IL6/EGFR	11
	BP	GO:0048659	smooth muscle cell proliferation	9.21047e-14	1.02134e-11	3.30715e-12	TNF/EDN1/STAT1/HMOX1/JUN/IGF1/PTGS2/AKT1/MMP9/IL6/EGFR	11
	BP	GO:0045933	positive regulation of muscle contraction	1.14178e-13	1.22089e-11	3.95331e-12	OXTR/OXT/ADRA1B/EDN1/ADRA1A/PTGS2/CHRM3/EDN2	8
	BP	GO:0007204	positive regulation of cytosolic calcium ion concentration	1.35602e-13	1.39997e-11	4.5332e-12	OXTR/OXT/ADRA1B/HTR2C/EDN1/EDNRA/ESR1/ADRA1A/IL2/HTR2B/F2/HTR2A/EDN2	13
	BP	GO:0048015	phosphatidylinositol-mediated signaling	1.7265e-13	1.72305e-11	5.57932e-12	TNF/EDN1/INS/HTR2B/MAPK1/F2/HTR2A/MAPK3/IGF1/AKT1/EGFR	11
	BP	GO:0008217	regulation of blood pressure	1.83475e-13	1.77201e-11	5.73786e-12	OXTR/OXT/ADRA1B/EDN1/EDNRA/ADRA1A/HMOX1/AR/PTGS2/NOS3/EDN2	11
	BP	GO:0048017	inositol lipid-mediated signaling	2.06984e-13	1.89691e-11	6.14231e-12	TNF/EDN1/INS/HTR2B/MAPK1/F2/HTR2A/MAPK3/IGF1/AKT1/EGFR	11
	BP	GO:0032496	response to lipopolysaccharide	2.09079e-13	1.89691e-11	6.14231e-12	TNF/EDN1/CASP3/MAPK1/CCL2/JUN/FOS/ICAM1/MAPK3/PTGS2/AKT1/NOS3/IL6	13
	BP	GO:0007187	G protein-coupled receptor signaling pathway, coupled to cyclic nucleotide second messenger	2.62122e-13	2.24227e-11	7.26058e-12	ADRA1B/HTR2C/EDN1/EDNRA/ADRA1D/ADRA1A/HTR2B/CCL2/HRH1/HTR2A/CHRM1/CHRM3	12
	BP	GO:0050730	regulation of peptidyl-tyrosine phosphorylation	2.62122e-13	2.24227e-11	7.26058e-12	EGF/TP53/TNF/ADRA1A/IL2/VEGFA/STAT3/HTR2A/ICAM1/IGF1/IL6/EGFR	12
	BP	GO:0050731	positive regulation of peptidyl-tyrosine phosphorylation	3.30783e-13	2.75101e-11	8.90792e-12	EGF/TP53/TNF/ADRA1A/IL2/VEGFA/STAT3/HTR2A/ICAM1/IGF1/IL6	11
	BP	GO:0002237	response to molecule of bacterial origin	3.42117e-13	2.76837e-11	8.96413e-12	TNF/EDN1/CASP3/MAPK1/CCL2/JUN/FOS/ICAM1/MAPK3/PTGS2/AKT1/NOS3/IL6	13
	BP	GO:0019932	second-messenger-mediated signaling	3.72907e-13	2.93812e-11	9.51379e-12	ADRA1B/TNF/HTR2C/EDN1/ADRA1D/ADRA1A/INS/HTR2B/VEGFA/HRH1/IGF1/NOS3/EDN2/EGFR	14
	BP	GO:0051480	regulation of cytosolic calcium ion concentration	5.68979e-13	4.36801e-11	1.41438e-11	OXTR/OXT/ADRA1B/HTR2C/EDN1/EDNRA/ESR1/ADRA1A/IL2/HTR2B/F2/HTR2A/EDN2	13
	BP	GO:0018108	peptidyl-tyrosine phosphorylation	7.03042e-13	5.18111e-11	1.67767e-11	EGF/TP53/TNF/ADRA1A/IL2/VEGFA/STAT3/HTR2A/ICAM1/MAPK3/IGF1/IL6/EGFR	13
	BP	GO:0050679	positive regulation of epithelial cell proliferation	7.16472e-13	5.18111e-11	1.67767e-11	HTR2B/CCND1/HMOX1/VEGFA/STAT3/JUN/MYC/AR/IGF1/AKT1/EGFR	11
	BP	GO:0010038	response to metal ion	7.28013e-13	5.18111e-11	1.67767e-11	EDN1/CCND1/CASP3/HMOX1/MAPK1/JUN/FOS/ICAM1/MAPK3/PTGS2/AKT1/MMP9/EGFR	13
	BP	GO:0051384	response to glucocorticoid	7.44114e-13	5.18111e-11	1.67767e-11	OXT/TNF/EDN1/CCND1/CASP3/FOS/ICAM1/PTGS2/IL6/EGFR	10
	BP	GO:0018212	peptidyl-tyrosine modification	7.80409e-13	5.31033e-11	1.71951e-11	EGF/TP53/TNF/ADRA1A/IL2/VEGFA/STAT3/HTR2A/ICAM1/MAPK3/IGF1/IL6/EGFR	13
	BP	GO:0003012	muscle system process	8.13652e-13	5.4135e-11	1.75292e-11	OXTR/OXT/ADRA1B/EDN1/EDNRA/ADRA1A/HTR2B/HMOX1/HTR2A/IGF1/PTGS2/CHRM3/NOS3/EDN2	14
	BP	GO:0035690	cellular response to drug	8.65506e-13	5.63332e-11	1.8241e-11	TP53/TNF/EDN1/HMOX1/MAPK1/ICAM1/MAPK3/CHRM1/MYC/PTGS2/CHRM3/IL6/EGFR	13
	BP	GO:0007200	phospholipase C-activating G protein-coupled receptor signaling pathway	9.67727e-13	6.16463e-11	1.99614e-11	ADRA1B/HTR2C/EDN1/ESR1/ADRA1A/HRH1/F2/HTR2A/CHRM1	9
	BP	GO:0046686	response to cadmium ion	1.14368e-12	7.13368e-11	2.30993e-11	HMOX1/MAPK1/JUN/FOS/MAPK3/AKT1/MMP9/EGFR	8
	BP	GO:0062013	positive regulation of small molecule metabolic process	1.19304e-12	7.28972e-11	2.36045e-11	EGF/TNF/INS/STAT3/HRH1/HTR2A/IGF1/PTGS2/AKT1/NOS3	10
	BP	GO:0048545	response to steroid hormone	1.48124e-12	8.72178e-11	2.82416e-11	OXTR/OXT/TNF/EDN1/ESR1/CCND1/CASP3/FOS/ICAM1/AR/PTGS2/IL6/EGFR	13
	BP	GO:0006940	regulation of smooth muscle contraction	1.48567e-12	8.72178e-11	2.82416e-11	OXTR/OXT/ADRA1B/EDN1/ADRA1A/PTGS2/CHRM3/EDN2	8
	BP	GO:0044706	multi-multicellular organism process	1.62372e-12	9.34886e-11	3.02721e-11	OXTR/OXT/EDN1/ESR1/MAPK1/FOS/MAPK3/AR/PTGS2/AKT1/MMP9	11
	BP	GO:0031960	response to corticosteroid	2.11912e-12	1.1971e-10	3.87629e-11	OXT/TNF/EDN1/CCND1/CASP3/FOS/ICAM1/PTGS2/IL6/EGFR	10
	BP	GO:0034614	cellular response to reactive oxygen species	3.05135e-12	1.6918e-10	5.47815e-11	TNF/MAPK1/JUN/FOS/MAPK3/AKT1/NOS3/MMP9/IL6/EGFR	10
	BP	GO:0007568	aging	3.7895e-12	2.06287e-10	6.67967e-11	TP53/EDN1/ADRA1A/MAPK1/STAT3/JUN/FOS/HTR2A/ICAM1/MAPK3/PTGS2/AKT1	12
	BP	GO:0071902	positive regulation of protein serine/threonine kinase activity	6.03315e-12	3.22558e-10	1.04446e-10	EGF/TNF/EDN1/HTR2B/CCND1/VEGFA/MAPK1/HTR2A/MAPK3/IGF1/AKT1/EGFR	12
	BP	GO:0048732	gland development	6.69705e-12	3.51772e-10	1.13906e-10	EGF/OXTR/TNF/ESR1/CCND1/HMOX1/VEGFA/MAPK1/JUN/MAPK3/AR/AKT1/EGFR	13
	BP	GO:0050804	modulation of chemical synaptic transmission	7.09463e-12	3.66229e-10	1.18587e-10	OXTR/OXT/TNF/EDN1/ADRA1A/INS/MAPK1/CCL2/STAT3/HRH1/HTR2A/PTGS2/EGFR	13
	BP	GO:0099177	regulation of trans-synaptic signaling	7.3014e-12	3.70515e-10	1.19975e-10	OXTR/OXT/TNF/EDN1/ADRA1A/INS/MAPK1/CCL2/STAT3/HRH1/HTR2A/PTGS2/EGFR	13
	BP	GO:0071248	cellular response to metal ion	1.04209e-11	5.20003e-10	1.6838e-10	EDN1/HMOX1/MAPK1/JUN/FOS/MAPK3/PTGS2/AKT1/MMP9/EGFR	10
	BP	GO:0007565	female pregnancy	1.15645e-11	5.67607e-10	1.83794e-10	OXTR/OXT/ESR1/MAPK1/FOS/MAPK3/AR/PTGS2/AKT1/MMP9	10
	BP	GO:0006874	cellular calcium ion homeostasis	1.31402e-11	6.34544e-10	2.05469e-10	OXTR/OXT/ADRA1B/HTR2C/EDN1/EDNRA/ESR1/ADRA1A/IL2/HTR2B/F2/HTR2A/EDN2	13
	BP	GO:2000377	regulation of reactive oxygen species metabolic process	1.34907e-11	6.41127e-10	2.07601e-10	TP53/TNF/EDN1/INS/STAT3/F2/ICAM1/PTGS2/AKT1/EGFR	10
	BP	GO:0002685	regulation of leukocyte migration	1.41936e-11	6.63997e-10	2.15006e-10	TNF/EDN1/HMOX1/VEGFA/CCL2/ICAM1/MAPK3/AKT1/EDN2/IL6	10
	BP	GO:0060359	response to ammonium ion	1.50353e-11	6.92549e-10	2.24251e-10	OXTR/OXT/CASP3/MAPK1/HRH1/HTR2A/MAPK3/CHRM1/CHRM3	9
	BP	GO:0055074	calcium ion homeostasis	1.86375e-11	8.45466e-10	2.73767e-10	OXTR/OXT/ADRA1B/HTR2C/EDN1/EDNRA/ESR1/ADRA1A/IL2/HTR2B/F2/HTR2A/EDN2	13
	BP	GO:0072593	reactive oxygen species metabolic process	2.34356e-11	1.04726e-09	3.39108e-10	TP53/TNF/EDN1/INS/STAT3/F2/ICAM1/PTGS2/AKT1/NOS3/EGFR	11
	BP	GO:0072503	cellular divalent inorganic cation homeostasis	3.2909e-11	1.44896e-09	4.69182e-10	OXTR/OXT/ADRA1B/HTR2C/EDN1/EDNRA/ESR1/ADRA1A/IL2/HTR2B/F2/HTR2A/EDN2	13
	BP	GO:0070374	positive regulation of ERK1 and ERK2 cascade	3.54852e-11	1.53975e-09	4.98579e-10	TNF/HTR2C/ADRA1A/HTR2B/CCL2/JUN/HTR2A/ICAM1/MAPK3/EGFR	10
	BP	GO:0031667	response to nutrient levels	3.82481e-11	1.63593e-09	5.29722e-10	OXT/TP53/HTR2C/STAT1/CCND1/HMOX1/MAPK1/JUN/ICAM1/MAPK3/PTGS2/AKT1/EGFR	13
	BP	GO:0071241	cellular response to inorganic substance	3.88828e-11	1.63965e-09	5.30928e-10	EDN1/HMOX1/MAPK1/JUN/FOS/MAPK3/PTGS2/AKT1/MMP9/EGFR	10
	BP	GO:0007259	JAK-STAT cascade	5.54457e-11	2.30562e-09	7.46571e-10	EGF/TNF/STAT1/IL2/CCL2/STAT3/F2/IGF1/IL6	9
	BP	GO:2000379	positive regulation of reactive oxygen species metabolic process	6.07839e-11	2.49297e-09	8.07238e-10	TP53/TNF/EDN1/F2/ICAM1/PTGS2/AKT1/EGFR	8
	BP	GO:2001234	negative regulation of apoptotic signaling pathway	6.89925e-11	2.7914e-09	9.03871e-10	TNF/INS/HMOX1/ICAM1/AR/IGF1/PTGS2/AKT1/NOS3/MMP9	10
	BP	GO:0051222	positive regulation of protein transport	8.1718e-11	3.26218e-09	1.05631e-09	TP53/TNF/INS/IL2/HTR2B/MAPK1/MAPK3/CHRM1/IGF1/PTGS2/IL6/EGFR	12
	BP	GO:0051341	regulation of oxidoreductase activity	8.96151e-11	3.53036e-09	1.14315e-09	TNF/EDN1/INS/HTR2B/AKT1/NOS3/EDN2/EGFR	8
	BP	GO:0097696	STAT cascade	9.68337e-11	3.7652e-09	1.21919e-09	EGF/TNF/STAT1/IL2/CCL2/STAT3/F2/IGF1/IL6	9
	BP	GO:0046677	response to antibiotic	1.06154e-10	4.07467e-09	1.3194e-09	TP53/EDN1/STAT1/IL2/CCND1/CASP3/HMOX1/STAT3/JUN/ICAM1/IL6	11
	BP	GO:0050806	positive regulation of synaptic transmission	1.07797e-10	4.08538e-09	1.32287e-09	OXTR/OXT/TNF/ADRA1A/INS/MAPK1/CCL2/PTGS2/EGFR	9
	BP	GO:0098664	G protein-coupled serotonin receptor signaling pathway	1.14602e-10	4.28899e-09	1.3888e-09	HTR2C/HTR2B/HRH1/HTR2A/CHRM1/CHRM3	6
	BP	GO:0048608	reproductive structure development	1.16281e-10	4.29809e-09	1.39174e-09	ESR1/CCND1/CASP3/VEGFA/MAPK1/ICAM1/MAPK3/AR/PTGS2/AKT1/NOS3/EGFR	12
	BP	GO:0009266	response to temperature stimulus	1.18407e-10	4.3233e-09	1.39991e-09	HTR2B/HMOX1/MAPK1/FOS/HTR2A/MAPK3/IGF1/PTGS2/AKT1/NOS3	10
	BP	GO:0061458	reproductive system development	1.25938e-10	4.54288e-09	1.47101e-09	ESR1/CCND1/CASP3/VEGFA/MAPK1/ICAM1/MAPK3/AR/PTGS2/AKT1/NOS3/EGFR	12
	BP	GO:0001936	regulation of endothelial cell proliferation	1.63399e-10	5.82401e-09	1.88585e-09	TNF/STAT1/HTR2B/HMOX1/VEGFA/CCL2/STAT3/JUN/AKT1	9
	BP	GO:0007611	learning or memory	1.97252e-10	6.9479e-09	2.24977e-09	OXTR/OXT/CASP3/MAPK1/HRH1/JUN/FOS/HTR2A/PTGS2/EGFR	10
	BP	GO:0043406	positive regulation of MAP kinase activity	2.12842e-10	7.40988e-09	2.39936e-09	EGF/TNF/EDN1/HTR2B/VEGFA/MAPK1/HTR2A/MAPK3/IGF1/EGFR	10
	BP	GO:0090257	regulation of muscle system process	2.21042e-10	7.55834e-09	2.44743e-09	OXTR/OXT/ADRA1B/EDN1/ADRA1A/IGF1/PTGS2/CHRM3/NOS3/EDN2	10
	BP	GO:1904951	positive regulation of establishment of protein localization	2.22156e-10	7.55834e-09	2.44743e-09	TP53/TNF/INS/IL2/HTR2B/MAPK1/MAPK3/CHRM1/IGF1/PTGS2/IL6/EGFR	12
	BP	GO:0051091	positive regulation of DNA-binding transcription factor activity	2.38291e-10	8.01621e-09	2.59569e-09	TNF/EDN1/ESR1/INS/VEGFA/STAT3/ICAM1/AR/AKT1/IL6	10
	BP	GO:1903409	reactive oxygen species biosynthetic process	2.58356e-10	8.59463e-09	2.78299e-09	TNF/EDN1/INS/STAT3/ICAM1/PTGS2/AKT1/NOS3	8
	BP	GO:0007210	serotonin receptor signaling pathway	2.75724e-10	9.07161e-09	2.93744e-09	HTR2C/HTR2B/HRH1/HTR2A/CHRM1/CHRM3	6
	BP	GO:0006936	muscle contraction	2.95086e-10	9.60312e-09	3.10954e-09	OXTR/OXT/ADRA1B/EDN1/EDNRA/ADRA1A/HTR2B/HTR2A/PTGS2/CHRM3/EDN2	11
	BP	GO:0150076	neuroinflammatory response	3.05571e-10	9.83742e-09	3.18541e-09	TNF/JUN/IGF1/PTGS2/MMP9/IL6/EGFR	7
	BP	GO:0001935	endothelial cell proliferation	3.38611e-10	1.07851e-08	3.49228e-09	TNF/STAT1/HTR2B/HMOX1/VEGFA/CCL2/STAT3/JUN/AKT1	9
	BP	GO:1901654	response to ketone	3.71449e-10	1.16541e-08	3.77365e-09	OXTR/OXT/EDN1/CCND1/FOS/ICAM1/AR/AKT1/EGFR	9
	BP	GO:0060749	mammary gland alveolus development	3.7757e-10	1.16541e-08	3.77365e-09	EGF/ESR1/CCND1/VEGFA/AR	5
	BP	GO:0061377	mammary gland lobule development	3.7757e-10	1.16541e-08	3.77365e-09	EGF/ESR1/CCND1/VEGFA/AR	5
	BP	GO:0036293	response to decreased oxygen levels	3.9442e-10	1.20499e-08	3.90183e-09	OXTR/TP53/EDN1/EDNRA/CASP3/HMOX1/VEGFA/ICAM1/MYC/PTGS2/AKT1	11
	BP	GO:0010863	positive regulation of phospholipase C activity	5.1181e-10	1.54784e-08	5.01198e-09	EDNRA/ESR1/ADRA1A/HTR2B/HTR2A/EGFR	6
	BP	GO:0048708	astrocyte differentiation	5.30072e-10	1.58704e-08	5.13891e-09	TNF/MAPK1/STAT3/F2/MAPK3/IL6/EGFR	7
	BP	GO:0032355	response to estradiol	5.4827e-10	1.62527e-08	5.26271e-09	OXTR/OXT/ESR1/CCND1/CASP3/STAT3/PTGS2/EGFR	8
	BP	GO:0050900	leukocyte migration	6.21618e-10	1.82463e-08	5.90826e-09	TNF/EDN1/HMOX1/VEGFA/CCL2/HRH1/F2/ICAM1/MAPK3/AKT1/EDN2/IL6	12
	BP	GO:0042063	gliogenesis	6.64523e-10	1.93163e-08	6.25474e-09	TNF/MAPK1/CCL2/STAT3/F2/MAPK3/CHRM1/AKT1/IL6/EGFR	10
	BP	GO:1900274	regulation of phospholipase C activity	6.81535e-10	1.95911e-08	6.34372e-09	EDNRA/ESR1/ADRA1A/HTR2B/HTR2A/EGFR	6
	BP	GO:0046889	positive regulation of lipid biosynthetic process	6.87064e-10	1.95911e-08	6.34372e-09	TNF/HTR2C/INS/HTR2B/HTR2A/PTGS2/AKT1	7
	BP	GO:0070482	response to oxygen levels	7.65755e-10	2.1629e-08	7.00358e-09	OXTR/TP53/EDN1/EDNRA/CASP3/HMOX1/VEGFA/ICAM1/MYC/PTGS2/AKT1	11
	BP	GO:0009612	response to mechanical stimulus	7.84825e-10	2.19604e-08	7.11091e-09	EDN1/STAT1/JUN/FOS/HTR2A/MAPK3/PTGS2/AKT1/EGFR	9
	BP	GO:1903532	positive regulation of secretion by cell	8.74476e-10	2.42424e-08	7.84983e-09	OXTR/OXT/TNF/EDN1/INS/IL2/HTR2B/MAPK3/IGF1/IL6/EGFR	11
	BP	GO:0006953	acute-phase response	8.95493e-10	2.45973e-08	7.96474e-09	TNF/INS/STAT3/F2/PTGS2/IL6	6
	BP	GO:0030879	mammary gland development	9.21326e-10	2.48956e-08	8.06133e-09	EGF/OXTR/ESR1/CCND1/VEGFA/MAPK1/AR/AKT1	8
	BP	GO:0070372	regulation of ERK1 and ERK2 cascade	9.22983e-10	2.48956e-08	8.06133e-09	TNF/HTR2C/ADRA1A/HTR2B/CCL2/JUN/HTR2A/ICAM1/MAPK3/EGFR	10
	BP	GO:2001233	regulation of apoptotic signaling pathway	1.04998e-09	2.80681e-08	9.08861e-09	TP53/TNF/INS/HMOX1/ICAM1/AR/IGF1/PTGS2/AKT1/NOS3/MMP9	11
	BP	GO:0045834	positive regulation of lipid metabolic process	1.08702e-09	2.88013e-08	9.32602e-09	TNF/HTR2C/INS/HTR2B/F2/HTR2A/PTGS2/AKT1	8
	BP	GO:0003044	regulation of systemic arterial blood pressure mediated by a chemical signal	1.16237e-09	3.05275e-08	9.88496e-09	OXTR/ADRA1B/EDN1/ADRA1A/NOS3/EDN2	6
	BP	GO:0048754	branching morphogenesis of an epithelial tube	1.34778e-09	3.48066e-08	1.12706e-08	EGF/TNF/EDN1/EDNRA/ESR1/VEGFA/MYC/AR	8
	BP	GO:0034612	response to tumor necrosis factor	1.34855e-09	3.48066e-08	1.12706e-08	TNF/EDN1/STAT1/CASP3/MAPK1/CCL2/ICAM1/MAPK3/PTGS2/AKT1	10
	BP	GO:0097191	extrinsic apoptotic signaling pathway	1.38695e-09	3.54917e-08	1.14924e-08	TNF/IL2/CASP3/HMOX1/ICAM1/AR/IGF1/AKT1/NOS3	9
	BP	GO:0003073	regulation of systemic arterial blood pressure	1.41594e-09	3.59266e-08	1.16332e-08	OXTR/ADRA1B/EDN1/ADRA1A/AR/NOS3/EDN2	7
	BP	GO:0050999	regulation of nitric-oxide synthase activity	1.49204e-09	3.75392e-08	1.21554e-08	TNF/INS/HTR2B/AKT1/NOS3/EGFR	6
	BP	GO:0051047	positive regulation of secretion	1.82625e-09	4.55649e-08	1.47542e-08	OXTR/OXT/TNF/EDN1/INS/IL2/HTR2B/MAPK3/IGF1/IL6/EGFR	11
	BP	GO:0032103	positive regulation of response to external stimulus	1.8836e-09	4.66074e-08	1.50917e-08	TNF/EDN1/IL2/VEGFA/F2/MAPK3/PTGS2/EDN2/IL6/EGFR	10
	BP	GO:1903829	positive regulation of cellular protein localization	1.94052e-09	4.76223e-08	1.54204e-08	EGF/TP53/TNF/INS/MAPK1/F2/CHRM1/PTGS2/AKT1/EGFR	10
	BP	GO:0051353	positive regulation of oxidoreductase activity	2.12912e-09	5.18258e-08	1.67815e-08	TNF/EDN1/INS/HTR2B/AKT1/EDN2	6
	BP	GO:0071216	cellular response to biotic stimulus	2.1944e-09	5.29841e-08	1.71565e-08	TP53/TNF/MAPK1/CCL2/ICAM1/MAPK3/AKT1/NOS3/IL6	9
	BP	GO:0014829	vascular smooth muscle contraction	2.31437e-09	5.54337e-08	1.79497e-08	EDN1/EDNRA/HTR2A/CHRM3/EDN2	5
	BP	GO:1903426	regulation of reactive oxygen species biosynthetic process	2.53707e-09	6.02855e-08	1.95208e-08	TNF/EDN1/INS/STAT3/ICAM1/PTGS2/AKT1	7
	BP	GO:0043405	regulation of MAP kinase activity	2.83289e-09	6.67849e-08	2.16253e-08	EGF/TNF/EDN1/HTR2B/VEGFA/MAPK1/HTR2A/MAPK3/IGF1/EGFR	10
	BP	GO:0009314	response to radiation	2.94314e-09	6.88419e-08	2.22914e-08	TP53/CCND1/CASP3/HRH1/JUN/FOS/ICAM1/MYC/PTGS2/AKT1/EGFR	11
	BP	GO:0071496	cellular response to external stimulus	2.99851e-09	6.95934e-08	2.25347e-08	TP53/HMOX1/MAPK1/JUN/FOS/ICAM1/MAPK3/PTGS2/AKT1/EGFR	10
	BP	GO:0019233	sensory perception of pain	3.11811e-09	7.12644e-08	2.30758e-08	OXT/EDN1/MAPK1/CCL2/HTR2A/MAPK3/PTGS2	7
	BP	GO:2001237	negative regulation of extrinsic apoptotic signaling pathway	3.11811e-09	7.12644e-08	2.30758e-08	TNF/HMOX1/ICAM1/AR/IGF1/AKT1/NOS3	7
	BP	GO:0048872	homeostasis of number of cells	3.15727e-09	7.16127e-08	2.31886e-08	STAT1/IL2/CASP3/HMOX1/VEGFA/STAT3/AKT1/NOS3/IL6	9
	BP	GO:0031663	lipopolysaccharide-mediated signaling pathway	3.31465e-09	7.4617e-08	2.41614e-08	TNF/MAPK1/CCL2/MAPK3/AKT1/NOS3	6
	BP	GO:0030307	positive regulation of cell growth	3.46708e-09	7.7466e-08	2.50839e-08	EDN1/INS/IL2/VEGFA/F2/IGF1/AKT1/EGFR	8
	BP	GO:0010518	positive regulation of phospholipase activity	3.68379e-09	8.16982e-08	2.64543e-08	EDNRA/ESR1/ADRA1A/HTR2B/HTR2A/EGFR	6
	BP	GO:0062012	regulation of small molecule metabolic process	3.78952e-09	8.25401e-08	2.6727e-08	EGF/TP53/TNF/INS/STAT3/HRH1/HTR2A/IGF1/PTGS2/AKT1/NOS3	11
	BP	GO:0006937	regulation of muscle contraction	3.80446e-09	8.25401e-08	2.6727e-08	OXTR/OXT/ADRA1B/EDN1/ADRA1A/PTGS2/CHRM3/EDN2	8
	BP	GO:0010634	positive regulation of epithelial cell migration	3.80446e-09	8.25401e-08	2.6727e-08	EDN1/HMOX1/VEGFA/JUN/PTGS2/AKT1/NOS3/MMP9	8
	BP	GO:0001659	temperature homeostasis	4.1699e-09	8.98177e-08	2.90835e-08	OXTR/OXT/TNF/VEGFA/STAT3/HTR2A/PTGS2/EDN2	8
	BP	GO:0001666	response to hypoxia	5.19288e-09	1.11053e-07	3.59597e-08	TP53/EDN1/EDNRA/CASP3/HMOX1/VEGFA/ICAM1/MYC/PTGS2/AKT1	10
	BP	GO:0032768	regulation of monooxygenase activity	6.07918e-09	1.28177e-07	4.15043e-08	TNF/INS/HTR2B/AKT1/NOS3/EGFR	6
	BP	GO:0060135	maternal process involved in female pregnancy	6.07918e-09	1.28177e-07	4.15043e-08	ESR1/MAPK1/MAPK3/AR/PTGS2/AKT1	6
	BP	GO:0061138	morphogenesis of a branching epithelium	6.21642e-09	1.30154e-07	4.21444e-08	EGF/TNF/EDN1/EDNRA/ESR1/VEGFA/MYC/AR	8
	BP	GO:0048871	multicellular organismal homeostasis	6.71614e-09	1.3964e-07	4.52161e-08	OXTR/OXT/TNF/VEGFA/STAT3/HTR2A/PTGS2/NOS3/EDN2/IL6/EGFR	11
	BP	GO:0045927	positive regulation of growth	7.11561e-09	1.46925e-07	4.75752e-08	EDN1/INS/IL2/VEGFA/MAPK1/F2/IGF1/AKT1/EGFR	9
	BP	GO:0014820	tonic smooth muscle contraction	7.21571e-09	1.47972e-07	4.7914e-08	EDN1/EDNRA/HTR2A/EDN2	4
	BP	GO:0007202	activation of phospholipase C activity	7.32834e-09	1.49259e-07	4.83309e-08	EDNRA/ADRA1A/HTR2B/HTR2A/EGFR	5
	BP	GO:0001701	in utero embryonic development	7.48212e-09	1.51361e-07	4.90116e-08	TP53/EDN1/EDNRA/VEGFA/MAPK1/AR/IGF1/AKT1/NOS3/EGFR	10
	BP	GO:0071242	cellular response to ammonium ion	8.81627e-09	1.77154e-07	5.73634e-08	CASP3/MAPK1/HRH1/MAPK3/CHRM1/CHRM3	6
	BP	GO:0060485	mesenchyme development	9.17196e-09	1.83072e-07	5.92798e-08	EDN1/EDNRA/STAT1/HTR2B/MAPK1/MAPK3/MYC/NOS3/IL6	9
	BP	GO:0010517	regulation of phospholipase activity	1.05262e-08	2.07339e-07	6.71376e-08	EDNRA/ESR1/ADRA1A/HTR2B/HTR2A/EGFR	6
	BP	GO:0051966	regulation of synaptic transmission, glutamatergic	1.05262e-08	2.07339e-07	6.71376e-08	OXTR/TNF/CCL2/HTR2A/PTGS2/EGFR	6
	BP	GO:0014066	regulation of phosphatidylinositol 3-kinase signaling	1.06911e-08	2.09211e-07	6.77437e-08	TNF/INS/MAPK1/F2/MAPK3/IGF1/EGFR	7
	BP	GO:0001763	morphogenesis of a branching structure	1.11178e-08	2.16147e-07	6.99894e-08	EGF/TNF/EDN1/EDNRA/ESR1/VEGFA/MYC/AR	8
	BP	GO:0060193	positive regulation of lipase activity	1.25017e-08	2.41484e-07	7.81939e-08	EDNRA/ESR1/ADRA1A/HTR2B/HTR2A/EGFR	6
	BP	GO:0002687	positive regulation of leukocyte migration	1.33371e-08	2.5597e-07	8.28846e-08	TNF/EDN1/VEGFA/ICAM1/MAPK3/EDN2/IL6	7
	BP	GO:0071222	cellular response to lipopolysaccharide	1.57916e-08	3.01146e-07	9.75127e-08	TNF/MAPK1/CCL2/ICAM1/MAPK3/AKT1/NOS3/IL6	8
	BP	GO:0006109	regulation of carbohydrate metabolic process	1.64028e-08	3.10824e-07	1.00646e-07	EGF/TP53/INS/STAT3/HRH1/HTR2A/IGF1/AKT1	8
	BP	GO:0045598	regulation of fat cell differentiation	1.6519e-08	3.11056e-07	1.00722e-07	TNF/HTR2C/INS/HTR2A/PTGS2/AKT1/IL6	7
	BP	GO:0071456	cellular response to hypoxia	1.70345e-08	3.18758e-07	1.03215e-07	TP53/EDN1/HMOX1/VEGFA/ICAM1/MYC/PTGS2/AKT1	8
	BP	GO:0006809	nitric oxide biosynthetic process	1.8815e-08	3.49888e-07	1.13296e-07	TNF/EDN1/ICAM1/PTGS2/AKT1/NOS3	6
	BP	GO:0010827	regulation of glucose transmembrane transport	2.03491e-08	3.76082e-07	1.21778e-07	TNF/EDN1/EDNRA/INS/IGF1/AKT1	6
	BP	GO:0071219	cellular response to molecule of bacterial origin	2.05179e-08	3.76875e-07	1.22034e-07	TNF/MAPK1/CCL2/ICAM1/MAPK3/AKT1/NOS3/IL6	8
	BP	GO:0046425	regulation of JAK-STAT cascade	2.13816e-08	3.90345e-07	1.26396e-07	EGF/TNF/IL2/STAT3/F2/IGF1/IL6	7
	BP	GO:0009895	negative regulation of catabolic process	2.22669e-08	4.04043e-07	1.30832e-07	TP53/TNF/ADRA1A/INS/HTR2B/HMOX1/STAT3/AKT1/EGFR	9
	BP	GO:0036294	cellular response to decreased oxygen levels	2.46002e-08	4.43693e-07	1.4367e-07	TP53/EDN1/HMOX1/VEGFA/ICAM1/MYC/PTGS2/AKT1	8
	BP	GO:0010001	glial cell differentiation	2.54958e-08	4.5591e-07	1.47626e-07	TNF/MAPK1/STAT3/F2/MAPK3/AKT1/IL6/EGFR	8
	BP	GO:1901214	regulation of neuron death	2.55821e-08	4.5591e-07	1.47626e-07	TP53/TNF/CASP3/HMOX1/CCL2/STAT3/JUN/FOS/AKT1	9
	BP	GO:0009411	response to UV	2.60987e-08	4.62364e-07	1.49716e-07	TP53/CCND1/CASP3/MYC/PTGS2/AKT1/EGFR	7
	BP	GO:0009416	response to light stimulus	2.62947e-08	4.63096e-07	1.49953e-07	TP53/CCND1/CASP3/HRH1/FOS/MYC/PTGS2/AKT1/EGFR	9
	BP	GO:0046209	nitric oxide metabolic process	2.75585e-08	4.82516e-07	1.56241e-07	TNF/EDN1/ICAM1/PTGS2/AKT1/NOS3	6
	BP	GO:0006970	response to osmotic stress	2.96568e-08	5.10301e-07	1.65238e-07	OXT/TP53/TNF/CASP3/PTGS2/EGFR	6
	BP	GO:0045913	positive regulation of carbohydrate metabolic process	2.96568e-08	5.10301e-07	1.65238e-07	EGF/INS/HRH1/HTR2A/IGF1/AKT1	6
	BP	GO:0048145	regulation of fibroblast proliferation	2.96568e-08	5.10301e-07	1.65238e-07	TP53/ESR1/JUN/MYC/IGF1/EGFR	6
	BP	GO:0045444	fat cell differentiation	3.04085e-08	5.20246e-07	1.68458e-07	TNF/HTR2C/INS/CCND1/HTR2A/PTGS2/AKT1/IL6	8
	BP	GO:0006816	calcium ion transport	3.14342e-08	5.3332e-07	1.72692e-07	EGF/HTR2C/ADRA1A/HTR2B/CCL2/F2/HTR2A/ICAM1/PTGS2/NOS3	10
	BP	GO:0150077	regulation of neuroinflammatory response	3.17919e-08	5.3332e-07	1.72692e-07	TNF/IGF1/PTGS2/MMP9/IL6	5
	BP	GO:0010507	negative regulation of autophagy	3.18852e-08	5.3332e-07	1.72692e-07	TP53/ADRA1A/HTR2B/HMOX1/STAT3/AKT1	6
	BP	GO:0048144	fibroblast proliferation	3.18852e-08	5.3332e-07	1.72692e-07	TP53/ESR1/JUN/MYC/IGF1/EGFR	6
	BP	GO:0060562	epithelial tube morphogenesis	3.26494e-08	5.43068e-07	1.75848e-07	EGF/TNF/EDN1/EDNRA/ESR1/CASP3/VEGFA/MYC/AR	9
	BP	GO:1904892	regulation of STAT cascade	3.32096e-08	5.49334e-07	1.77877e-07	EGF/TNF/IL2/STAT3/F2/IGF1/IL6	7
	BP	GO:1904705	regulation of vascular smooth muscle cell proliferation	3.42501e-08	5.57309e-07	1.8046e-07	TNF/EDN1/HMOX1/JUN/IGF1/MMP9	6
	BP	GO:1990874	vascular smooth muscle cell proliferation	3.42501e-08	5.57309e-07	1.8046e-07	TNF/EDN1/HMOX1/JUN/IGF1/MMP9	6
	BP	GO:2001057	reactive nitrogen species metabolic process	3.42501e-08	5.57309e-07	1.8046e-07	TNF/EDN1/ICAM1/PTGS2/AKT1/NOS3	6
	BP	GO:0051054	positive regulation of DNA metabolic process	3.61175e-08	5.84517e-07	1.8927e-07	IL2/MAPK1/JUN/MAPK3/MYC/AKT1/IL6/EGFR	8
	BP	GO:0045429	positive regulation of nitric oxide biosynthetic process	4.07018e-08	6.55167e-07	2.12147e-07	TNF/EDN1/ICAM1/PTGS2/AKT1	5
	BP	GO:0032147	activation of protein kinase activity	4.35628e-08	6.9747e-07	2.25845e-07	EGF/TNF/INS/VEGFA/MAPK1/MAPK3/IGF1/AKT1/EGFR	9
	BP	GO:0071453	cellular response to oxygen levels	4.41687e-08	7.0341e-07	2.27768e-07	TP53/EDN1/HMOX1/VEGFA/ICAM1/MYC/PTGS2/AKT1	8
	BP	GO:0046427	positive regulation of JAK-STAT cascade	4.52073e-08	7.1614e-07	2.3189e-07	TNF/IL2/STAT3/F2/IGF1/IL6	6
	BP	GO:1904407	positive regulation of nitric oxide metabolic process	4.58441e-08	7.22407e-07	2.33919e-07	TNF/EDN1/ICAM1/PTGS2/AKT1	5
	BP	GO:0032872	regulation of stress-activated MAPK cascade	4.87441e-08	7.64082e-07	2.47414e-07	TNF/EDN1/VEGFA/MAPK1/MAPK3/MYC/AKT1/EGFR	8
	BP	GO:2001236	regulation of extrinsic apoptotic signaling pathway	5.01663e-08	7.82281e-07	2.53307e-07	TNF/HMOX1/ICAM1/AR/IGF1/AKT1/NOS3	7
	BP	GO:0070302	regulation of stress-activated protein kinase signaling cascade	5.20164e-08	8.06928e-07	2.61288e-07	TNF/EDN1/VEGFA/MAPK1/MAPK3/MYC/AKT1/EGFR	8
	BP	GO:1904894	positive regulation of STAT cascade	5.51982e-08	8.51874e-07	2.75841e-07	TNF/IL2/STAT3/F2/IGF1/IL6	6
	BP	GO:0001101	response to acid chemical	5.61263e-08	8.61754e-07	2.79041e-07	OXT/TNF/EDN1/CASP3/VEGFA/ICAM1/PTGS2/AKT1/EGFR	9
	BP	GO:0030810	positive regulation of nucleotide biosynthetic process	5.76732e-08	8.76516e-07	2.83821e-07	INS/STAT3/HTR2A/IGF1/NOS3	5
	BP	GO:1900373	positive regulation of purine nucleotide biosynthetic process	5.76732e-08	8.76516e-07	2.83821e-07	INS/STAT3/HTR2A/IGF1/NOS3	5
	BP	GO:0001819	positive regulation of cytokine production	5.88832e-08	8.77456e-07	2.84125e-07	TNF/STAT1/INS/IL2/HTR2B/HMOX1/STAT3/MAPK3/PTGS2/IL6	10
	BP	GO:0042110	T cell activation	5.88832e-08	8.77456e-07	2.84125e-07	TP53/INS/IL2/CASP3/CCL2/STAT3/ICAM1/IGF1/AKT1/IL6	10
	BP	GO:0007589	body fluid secretion	5.89074e-08	8.77456e-07	2.84125e-07	OXTR/EDN1/CCND1/VEGFA/CHRM1/CHRM3	6
	BP	GO:0035249	synaptic transmission, glutamatergic	5.89074e-08	8.77456e-07	2.84125e-07	OXTR/TNF/CCL2/HTR2A/PTGS2/EGFR	6
	BP	GO:0070997	neuron death	6.35188e-08	9.41462e-07	3.04851e-07	TP53/TNF/CASP3/HMOX1/CCL2/STAT3/JUN/FOS/AKT1	9
	BP	GO:0045931	positive regulation of mitotic cell cycle	7.09004e-08	1.04569e-06	3.38601e-07	EGF/EDN1/INS/CCND1/IGF1/AKT1/EGFR	7
	BP	GO:0035094	response to nicotine	7.98335e-08	1.16596e-06	3.77544e-07	TNF/EDN1/CASP3/HMOX1/MAPK1	5
	BP	GO:1904707	positive regulation of vascular smooth muscle cell proliferation	7.98335e-08	1.16596e-06	3.77544e-07	TNF/EDN1/JUN/IGF1/MMP9	5
	BP	GO:0060191	regulation of lipase activity	8.06768e-08	1.17256e-06	3.7968e-07	EDNRA/ESR1/ADRA1A/HTR2B/HTR2A/EGFR	6
	BP	GO:0035051	cardiocyte differentiation	8.37269e-08	1.21101e-06	3.92131e-07	EDN1/ADRA1A/VEGFA/MAPK1/MAPK3/IGF1/EGFR	7
	BP	GO:0070838	divalent metal ion transport	8.56791e-08	1.23329e-06	3.99345e-07	EGF/HTR2C/ADRA1A/HTR2B/CCL2/F2/HTR2A/ICAM1/PTGS2/NOS3	10
	BP	GO:0031331	positive regulation of cellular catabolic process	8.68573e-08	1.24426e-06	4.02899e-07	EGF/TNF/INS/HMOX1/HTR2A/MAPK3/IGF1/AKT1/IL6	9
	BP	GO:0016049	cell growth	8.7348e-08	1.24533e-06	4.03246e-07	TP53/EDN1/ADRA1A/INS/IL2/VEGFA/F2/IGF1/AKT1/EGFR	10
	BP	GO:0050727	regulation of inflammatory response	8.90455e-08	1.26352e-06	4.09134e-07	TNF/ESR1/INS/IL2/F2/IGF1/PTGS2/MMP9/IL6/EGFR	10
	BP	GO:0048863	stem cell differentiation	9.10556e-08	1.28595e-06	4.16396e-07	TP53/EDN1/EDNRA/ESR1/HTR2B/MAPK1/STAT3/MAPK3	8
	BP	GO:0072511	divalent inorganic cation transport	9.61304e-08	1.35124e-06	4.3754e-07	EGF/HTR2C/ADRA1A/HTR2B/CCL2/F2/HTR2A/ICAM1/PTGS2/NOS3	10
	BP	GO:0007631	feeding behavior	9.66524e-08	1.35223e-06	4.3786e-07	OXTR/OXT/HTR2C/INS/STAT3/FOS	6
	BP	GO:0048146	positive regulation of fibroblast proliferation	9.80209e-08	1.365e-06	4.41994e-07	ESR1/JUN/MYC/IGF1/EGFR	5
	BP	GO:0030324	lung development	1.02471e-07	1.42036e-06	4.5992e-07	TNF/VEGFA/MAPK1/MAPK3/NOS3/EDN2/EGFR	7
	BP	GO:0009408	response to heat	1.19912e-07	1.64687e-06	5.33264e-07	HMOX1/MAPK1/MAPK3/IGF1/PTGS2/AKT1/NOS3	7
	BP	GO:0030323	respiratory tube development	1.19912e-07	1.64687e-06	5.33264e-07	TNF/VEGFA/MAPK1/MAPK3/NOS3/EDN2/EGFR	7
	BP	GO:0033138	positive regulation of peptidyl-serine phosphorylation	1.21924e-07	1.66686e-06	5.39738e-07	TNF/VEGFA/PTGS2/AKT1/IL6/EGFR	6
	BP	GO:0031668	cellular response to extracellular stimulus	1.25633e-07	1.70201e-06	5.51121e-07	TP53/HMOX1/MAPK1/JUN/FOS/ICAM1/MAPK3/PTGS2	8
	BP	GO:0050714	positive regulation of protein secretion	1.25633e-07	1.70201e-06	5.51121e-07	TNF/INS/IL2/HTR2B/MAPK3/IGF1/IL6/EGFR	8
	BP	GO:0042136	neurotransmitter biosynthetic process	1.29026e-07	1.73562e-06	5.62002e-07	TNF/EDN1/ICAM1/PTGS2/AKT1/NOS3	6
	BP	GO:0043491	protein kinase B signaling	1.29273e-07	1.73562e-06	5.62002e-07	EGF/TNF/ESR1/INS/CCL2/IGF1/AKT1/EGFR	8
	BP	GO:0048016	inositol phosphate-mediated signaling	1.44204e-07	1.91952e-06	6.21553e-07	TNF/EDN1/HRH1/IGF1/EDN2	5
	BP	GO:1904659	glucose transmembrane transport	1.44253e-07	1.91952e-06	6.21553e-07	TNF/EDN1/EDNRA/INS/IGF1/AKT1	6
	BP	GO:0051000	positive regulation of nitric-oxide synthase activity	1.57107e-07	2.08132e-06	6.73942e-07	TNF/INS/HTR2B/AKT1	4
	BP	GO:0045981	positive regulation of nucleotide metabolic process	1.72994e-07	2.26176e-06	7.32372e-07	INS/STAT3/HTR2A/IGF1/NOS3	5
	BP	GO:1900544	positive regulation of purine nucleotide metabolic process	1.72994e-07	2.26176e-06	7.32372e-07	INS/STAT3/HTR2A/IGF1/NOS3	5
	BP	GO:1903428	positive regulation of reactive oxygen species biosynthetic process	1.72994e-07	2.26176e-06	7.32372e-07	TNF/EDN1/ICAM1/PTGS2/AKT1	5
	BP	GO:0001938	positive regulation of endothelial cell proliferation	1.7916e-07	2.3221e-06	7.51909e-07	HTR2B/HMOX1/VEGFA/STAT3/JUN/AKT1	6
	BP	GO:0008645	hexose transmembrane transport	1.7916e-07	2.3221e-06	7.51909e-07	TNF/EDN1/EDNRA/INS/IGF1/AKT1	6
	BP	GO:0001503	ossification	1.98783e-07	2.54691e-06	8.24704e-07	OXT/TNF/MAPK1/MAPK3/IGF1/PTGS2/AKT1/IL6/EGFR	9
	BP	GO:0002688	regulation of leukocyte chemotaxis	1.99057e-07	2.54691e-06	8.24704e-07	EDN1/VEGFA/CCL2/MAPK3/EDN2/IL6	6
	BP	GO:0015749	monosaccharide transmembrane transport	1.99057e-07	2.54691e-06	8.24704e-07	TNF/EDN1/EDNRA/INS/IGF1/AKT1	6
	BP	GO:0001836	release of cytochrome c from mitochondria	2.06161e-07	2.62083e-06	8.4864e-07	TP53/JUN/IGF1/AKT1/MMP9	5
	BP	GO:0051403	stress-activated MAPK cascade	2.06585e-07	2.62083e-06	8.4864e-07	TNF/EDN1/VEGFA/MAPK1/MAPK3/MYC/AKT1/EGFR	8
	BP	GO:0002793	positive regulation of peptide secretion	2.17868e-07	2.75231e-06	8.91212e-07	TNF/INS/IL2/HTR2B/MAPK3/IGF1/IL6/EGFR	8
	BP	GO:0034219	carbohydrate transmembrane transport	2.20737e-07	2.76709e-06	8.95999e-07	TNF/EDN1/EDNRA/INS/IGF1/AKT1	6
	BP	GO:0022407	regulation of cell-cell adhesion	2.20887e-07	2.76709e-06	8.95999e-07	TNF/IL2/CASP3/VEGFA/CCL2/ICAM1/IGF1/AKT1/IL6	9
	BP	GO:0097193	intrinsic apoptotic signaling pathway	2.23705e-07	2.79072e-06	9.0365e-07	TP53/TNF/INS/CASP3/HMOX1/PTGS2/AKT1/MMP9	8
	BP	GO:0007219	Notch signaling pathway	2.2474e-07	2.792e-06	9.04065e-07	EGF/STAT1/STAT3/MYC/AKT1/NOS3/EGFR	7
	BP	GO:1900371	regulation of purine nucleotide biosynthetic process	2.32284e-07	2.87379e-06	9.30549e-07	TP53/INS/STAT3/HTR2A/IGF1/NOS3	6
	BP	GO:0010632	regulation of epithelial cell migration	2.35783e-07	2.89317e-06	9.36826e-07	EDN1/HMOX1/VEGFA/JUN/PTGS2/AKT1/NOS3/MMP9	8
	BP	GO:0071356	cellular response to tumor necrosis factor	2.35783e-07	2.89317e-06	9.36826e-07	TNF/EDN1/STAT1/MAPK1/CCL2/ICAM1/MAPK3/AKT1	8
	BP	GO:0030808	regulation of nucleotide biosynthetic process	2.44322e-07	2.98572e-06	9.66792e-07	TP53/INS/STAT3/HTR2A/IGF1/NOS3	6
	BP	GO:0046890	regulation of lipid biosynthetic process	2.67347e-07	3.24064e-06	1.04934e-06	TNF/HTR2C/INS/HTR2B/HTR2A/PTGS2/AKT1	7
	BP	GO:0060541	respiratory system development	2.67347e-07	3.24064e-06	1.04934e-06	TNF/VEGFA/MAPK1/MAPK3/NOS3/EDN2/EGFR	7
	BP	GO:0090068	positive regulation of cell cycle process	2.82574e-07	3.4114e-06	1.10463e-06	EGF/TP53/EDN1/INS/CCND1/IGF1/AKT1/EGFR	8
	BP	GO:0001558	regulation of cell growth	2.88659e-07	3.45699e-06	1.11939e-06	TP53/EDN1/INS/IL2/VEGFA/F2/IGF1/AKT1/EGFR	9
	BP	GO:0030099	myeloid cell differentiation	2.88659e-07	3.45699e-06	1.11939e-06	TNF/STAT1/CASP3/VEGFA/STAT3/JUN/FOS/MYC/MMP9	9
	BP	GO:0018105	peptidyl-serine phosphorylation	2.89868e-07	3.45763e-06	1.1196e-06	TNF/VEGFA/MAPK1/MAPK3/PTGS2/AKT1/IL6/EGFR	8
	BP	GO:0045600	positive regulation of fat cell differentiation	3.11389e-07	3.6996e-06	1.19795e-06	HTR2C/INS/HTR2A/PTGS2/AKT1	5
	BP	GO:0035265	organ growth	3.2728e-07	3.87303e-06	1.25411e-06	EDN1/ESR1/ADRA1A/MAPK1/AR/IGF1/AKT1	7
	BP	GO:1903037	regulation of leukocyte cell-cell adhesion	3.28816e-07	3.87589e-06	1.25503e-06	TNF/IL2/CASP3/CCL2/ICAM1/IGF1/AKT1/IL6	8
	BP	GO:0009896	positive regulation of catabolic process	3.3215e-07	3.89983e-06	1.26279e-06	EGF/TNF/INS/HMOX1/HTR2A/MAPK3/IGF1/AKT1/IL6	9
	BP	GO:0045428	regulation of nitric oxide biosynthetic process	3.63784e-07	4.25457e-06	1.37765e-06	TNF/EDN1/ICAM1/PTGS2/AKT1	5
	BP	GO:0051052	regulation of DNA metabolic process	3.73856e-07	4.35535e-06	1.41029e-06	TP53/IL2/MAPK1/JUN/MAPK3/MYC/AKT1/IL6/EGFR	9
	BP	GO:0010595	positive regulation of endothelial cell migration	3.95532e-07	4.59001e-06	1.48627e-06	EDN1/HMOX1/VEGFA/PTGS2/AKT1/NOS3	6
	BP	GO:0097529	myeloid leukocyte migration	3.98154e-07	4.60259e-06	1.49035e-06	EDN1/VEGFA/CCL2/HRH1/MAPK3/EDN2/IL6	7
	BP	GO:0043434	response to peptide hormone	4.28206e-07	4.93096e-06	1.59667e-06	OXTR/OXT/EDN1/STAT1/INS/STAT3/ICAM1/PTGS2/AKT1	9
	BP	GO:0031098	stress-activated protein kinase signaling cascade	4.30589e-07	4.9394e-06	1.5994e-06	TNF/EDN1/VEGFA/MAPK1/MAPK3/MYC/AKT1/EGFR	8
	BP	GO:0007205	protein kinase C-activating G protein-coupled receptor signaling pathway	4.35471e-07	4.95742e-06	1.60524e-06	EDN1/IL2/HTR2B/CHRM1	4
	BP	GO:0032770	positive regulation of monooxygenase activity	4.35471e-07	4.95742e-06	1.60524e-06	TNF/INS/HTR2B/AKT1	4
	BP	GO:0042698	ovulation cycle	4.55209e-07	5.16248e-06	1.67164e-06	OXTR/ESR1/CASP3/NOS3/EGFR	5
	BP	GO:0008406	gonad development	4.96764e-07	5.6125e-06	1.81736e-06	ESR1/CCND1/CASP3/VEGFA/ICAM1/AR/NOS3	7
	BP	GO:0007263	nitric oxide mediated signal transduction	5.04324e-07	5.67649e-06	1.83808e-06	INS/VEGFA/NOS3/EGFR	4
	BP	GO:0018209	peptidyl-serine modification	5.08522e-07	5.7023e-06	1.84644e-06	TNF/VEGFA/MAPK1/MAPK3/PTGS2/AKT1/IL6/EGFR	8
	BP	GO:1903039	positive regulation of leukocyte cell-cell adhesion	5.12398e-07	5.72433e-06	1.85357e-06	TNF/IL2/CCL2/ICAM1/IGF1/AKT1/IL6	7
	BP	GO:0042531	positive regulation of tyrosine phosphorylation of STAT protein	5.25623e-07	5.85024e-06	1.89434e-06	TNF/IL2/STAT3/IGF1/IL6	5
	BP	GO:0048762	mesenchymal cell differentiation	5.28445e-07	5.85987e-06	1.89746e-06	EDN1/EDNRA/STAT1/HTR2B/MAPK1/MAPK3/IL6	7
	BP	GO:0002526	acute inflammatory response	5.44912e-07	6.02017e-06	1.94937e-06	TNF/INS/STAT3/F2/ICAM1/PTGS2/IL6	7
	BP	GO:0007188	adenylate cyclase-modulating G protein-coupled receptor signaling pathway	5.61809e-07	6.18403e-06	2.00242e-06	ADRA1B/EDN1/EDNRA/ADRA1D/ADRA1A/CHRM1/CHRM3	7
	BP	GO:0061180	mammary gland epithelium development	5.63915e-07	6.18448e-06	2.00257e-06	ESR1/CCND1/MAPK1/AR/AKT1	5
	BP	GO:0010506	regulation of autophagy	5.71323e-07	6.24285e-06	2.02147e-06	TP53/ADRA1A/HTR2B/CASP3/HMOX1/STAT3/MAPK3/AKT1	8
	BP	GO:0045137	development of primary sexual characteristics	5.96927e-07	6.49891e-06	2.10438e-06	ESR1/CCND1/CASP3/VEGFA/ICAM1/AR/NOS3	7
	BP	GO:0030595	leukocyte chemotaxis	6.15167e-07	6.67323e-06	2.16083e-06	EDN1/VEGFA/CCL2/HRH1/MAPK3/EDN2/IL6	7
	BP	GO:0033135	regulation of peptidyl-serine phosphorylation	6.43037e-07	6.95037e-06	2.25057e-06	TNF/VEGFA/PTGS2/AKT1/IL6/EGFR	6
	BP	GO:1900182	positive regulation of protein localization to nucleus	6.47105e-07	6.96918e-06	2.25666e-06	INS/MAPK1/F2/PTGS2/AKT1	5
	BP	GO:0030431	sleep	6.65949e-07	7.1209e-06	2.30579e-06	OXTR/OXT/FOS/HTR2A	4
	BP	GO:1902895	positive regulation of pri-miRNA transcription by RNA polymerase II	6.65949e-07	7.1209e-06	2.30579e-06	TP53/STAT3/JUN/FOS	4
	BP	GO:0001667	ameboidal-type cell migration	6.82366e-07	7.27048e-06	2.35422e-06	EDN1/HTR2B/HMOX1/VEGFA/JUN/PTGS2/AKT1/NOS3/MMP9	9
	BP	GO:0046394	carboxylic acid biosynthetic process	6.94799e-07	7.3767e-06	2.38862e-06	EGF/TP53/EDN1/INS/STAT3/HTR2A/IGF1/PTGS2/EDN2	9
	BP	GO:0016053	organic acid biosynthetic process	7.07429e-07	7.48425e-06	2.42344e-06	EGF/TP53/EDN1/INS/STAT3/HTR2A/IGF1/PTGS2/EDN2	9
	BP	GO:0007159	leukocyte cell-cell adhesion	7.17066e-07	7.55949e-06	2.4478e-06	TNF/IL2/CASP3/CCL2/ICAM1/IGF1/AKT1/IL6	8
	BP	GO:0010675	regulation of cellular carbohydrate metabolic process	7.29013e-07	7.63169e-06	2.47118e-06	TP53/INS/STAT3/HRH1/IGF1/AKT1	6
	BP	GO:1900542	regulation of purine nucleotide metabolic process	7.29013e-07	7.63169e-06	2.47118e-06	TP53/INS/STAT3/HTR2A/IGF1/NOS3	6
	BP	GO:0051968	positive regulation of synaptic transmission, glutamatergic	7.59846e-07	7.92675e-06	2.56673e-06	OXTR/CCL2/PTGS2/EGFR	4
	BP	GO:0097305	response to alcohol	8.015e-07	8.33226e-06	2.69803e-06	OXT/IL2/CCND1/STAT3/FOS/ICAM1/AKT1	7
	BP	GO:0072330	monocarboxylic acid biosynthetic process	8.1894e-07	8.48411e-06	2.7472e-06	TP53/EDN1/INS/STAT3/HTR2A/IGF1/PTGS2/EDN2	8
	BP	GO:0006140	regulation of nucleotide metabolic process	8.5809e-07	8.85904e-06	2.86861e-06	TP53/INS/STAT3/HTR2A/IGF1/NOS3	6
	BP	GO:0002262	myeloid cell homeostasis	8.93124e-07	9.08694e-06	2.9424e-06	STAT1/CASP3/HMOX1/VEGFA/STAT3/IL6	6
	BP	GO:0019359	nicotinamide nucleotide biosynthetic process	8.93124e-07	9.08694e-06	2.9424e-06	TP53/INS/STAT3/HTR2A/IGF1/PTGS2	6
	BP	GO:0019363	pyridine nucleotide biosynthetic process	8.93124e-07	9.08694e-06	2.9424e-06	TP53/INS/STAT3/HTR2A/IGF1/PTGS2	6
	BP	GO:0006110	regulation of glycolytic process	8.97902e-07	9.08694e-06	2.9424e-06	TP53/INS/STAT3/HTR2A/IGF1	5
	BP	GO:0043536	positive regulation of blood vessel endothelial cell migration	8.97902e-07	9.08694e-06	2.9424e-06	HMOX1/VEGFA/PTGS2/AKT1/NOS3	5
	BP	GO:0031669	cellular response to nutrient levels	8.98375e-07	9.08694e-06	2.9424e-06	TP53/HMOX1/MAPK1/JUN/ICAM1/MAPK3/PTGS2	7
	BP	GO:0051048	negative regulation of secretion	9.24072e-07	9.31539e-06	3.01638e-06	EGF/OXTR/OXT/TNF/EDN1/INS/HMOX1	7
	BP	GO:0008643	carbohydrate transport	9.2932e-07	9.33686e-06	3.02333e-06	TNF/EDN1/EDNRA/INS/IGF1/AKT1	6
	BP	GO:0010631	epithelial cell migration	9.73854e-07	9.75157e-06	3.15761e-06	EDN1/HMOX1/VEGFA/JUN/PTGS2/AKT1/NOS3/MMP9	8
	BP	GO:0072525	pyridine-containing compound biosynthetic process	1.00532e-06	1.00331e-05	3.24877e-06	TP53/INS/STAT3/HTR2A/IGF1/PTGS2	6
	BP	GO:0014032	neural crest cell development	1.0174e-06	1.00864e-05	3.26605e-06	EDN1/EDNRA/HTR2B/MAPK1/MAPK3	5
	BP	GO:0030811	regulation of nucleotide catabolic process	1.0174e-06	1.00864e-05	3.26605e-06	TP53/INS/STAT3/HTR2A/IGF1	5
	BP	GO:0001505	regulation of neurotransmitter levels	1.03808e-06	1.02237e-05	3.31049e-06	TNF/EDN1/ADRA1A/HTR2A/ICAM1/PTGS2/AKT1/NOS3	8
	BP	GO:0090132	epithelium migration	1.03808e-06	1.02237e-05	3.31049e-06	EDN1/HMOX1/VEGFA/JUN/PTGS2/AKT1/NOS3/MMP9	8
	BP	GO:0001893	maternal placenta development	1.10099e-06	1.08077e-05	3.49961e-06	MAPK1/MAPK3/PTGS2/AKT1	4
	BP	GO:0042133	neurotransmitter metabolic process	1.12881e-06	1.10446e-05	3.5763e-06	TNF/EDN1/ICAM1/PTGS2/AKT1/NOS3	6
	BP	GO:0042509	regulation of tyrosine phosphorylation of STAT protein	1.14912e-06	1.12067e-05	3.62879e-06	TNF/IL2/STAT3/IGF1/IL6	5
	BP	GO:0090130	tissue migration	1.17745e-06	1.14457e-05	3.70618e-06	EDN1/HMOX1/VEGFA/JUN/PTGS2/AKT1/NOS3/MMP9	8
	BP	GO:2001171	positive regulation of ATP biosynthetic process	1.2366e-06	1.19818e-05	3.87977e-06	INS/STAT3/HTR2A/IGF1	4
	BP	GO:0010749	regulation of nitric oxide mediated signal transduction	1.25645e-06	1.21349e-05	3.92934e-06	INS/VEGFA/EGFR	3
	BP	GO:0014031	mesenchymal cell development	1.29393e-06	1.24167e-05	4.0206e-06	EDN1/EDNRA/HTR2B/MAPK1/MAPK3	5
	BP	GO:0048864	stem cell development	1.29393e-06	1.24167e-05	4.0206e-06	EDN1/EDNRA/HTR2B/MAPK1/MAPK3	5
	BP	GO:0043271	negative regulation of ion transport	1.3125e-06	1.25148e-05	4.05235e-06	HTR2A/ICAM1/PTGS2/AKT1/NOS3/MMP9	6
	BP	GO:1905952	regulation of lipid localization	1.3125e-06	1.25148e-05	4.05235e-06	EGF/OXT/TNF/EDN1/AKT1/IL6	6
	BP	GO:0008016	regulation of heart contraction	1.31852e-06	1.25322e-05	4.058e-06	OXT/ADRA1B/EDN1/ADRA1A/IL2/NOS3/EDN2	7
	BP	GO:0002791	regulation of peptide secretion	1.33886e-06	1.26853e-05	4.10756e-06	TNF/HTR2C/INS/IL2/HTR2B/MAPK3/IGF1/IL6/EGFR	9
	BP	GO:0043467	regulation of generation of precursor metabolites and energy	1.36205e-06	1.28643e-05	4.16553e-06	TP53/INS/STAT3/HTR2A/IGF1/AKT1	6
	BP	GO:0007260	tyrosine phosphorylation of STAT protein	1.37153e-06	1.29131e-05	4.18132e-06	TNF/IL2/STAT3/IGF1/IL6	5
	BP	GO:0032885	regulation of polysaccharide biosynthetic process	1.38423e-06	1.29512e-05	4.19368e-06	EGF/INS/IGF1/AKT1	4
	BP	GO:0045777	positive regulation of blood pressure	1.38423e-06	1.29512e-05	4.19368e-06	OXTR/OXT/ADRA1B/ADRA1A	4
	BP	GO:2000027	regulation of animal organ morphogenesis	1.39019e-06	1.29664e-05	4.1986e-06	TNF/EDN1/ESR1/STAT1/VEGFA/MYC/AR	7
	BP	GO:0002690	positive regulation of leukocyte chemotaxis	1.45275e-06	1.35079e-05	4.37394e-06	EDN1/VEGFA/MAPK3/EDN2/IL6	5
	BP	GO:0022409	positive regulation of cell-cell adhesion	1.46509e-06	1.35805e-05	4.39743e-06	TNF/IL2/CCL2/ICAM1/IGF1/AKT1/IL6	7
	BP	GO:0043470	regulation of carbohydrate catabolic process	1.53773e-06	1.4166e-05	4.58703e-06	TP53/INS/STAT3/HTR2A/IGF1	5
	BP	GO:1904035	regulation of epithelial cell apoptotic process	1.53773e-06	1.4166e-05	4.58703e-06	TNF/HMOX1/CCL2/ICAM1/IL6	5
	BP	GO:0014033	neural crest cell differentiation	1.7194e-06	1.57911e-05	5.11324e-06	EDN1/EDNRA/HTR2B/MAPK1/MAPK3	5
	BP	GO:0034504	protein localization to nucleus	1.75447e-06	1.60639e-05	5.20157e-06	TP53/INS/MAPK1/STAT3/F2/PTGS2/AKT1	7
	BP	GO:0045639	positive regulation of myeloid cell differentiation	1.81636e-06	1.65799e-05	5.36865e-06	TNF/STAT1/STAT3/JUN/FOS	5
	BP	GO:0031330	negative regulation of cellular catabolic process	1.84544e-06	1.6794e-05	5.438e-06	TP53/ADRA1A/INS/HTR2B/HMOX1/STAT3/AKT1	7
	BP	GO:0001990	regulation of systemic arterial blood pressure by hormone	1.9061e-06	1.72935e-05	5.59974e-06	OXTR/EDN1/NOS3/EDN2	4
	BP	GO:1901653	cellular response to peptide	1.94385e-06	1.75827e-05	5.69337e-06	TP53/EDN1/STAT1/INS/STAT3/ICAM1/IGF1/AKT1	8
	BP	GO:0009165	nucleotide biosynthetic process	1.98174e-06	1.78715e-05	5.78688e-06	TP53/INS/MAPK1/STAT3/HTR2A/IGF1/PTGS2/NOS3	8
	BP	GO:0045787	positive regulation of cell cycle	2.09922e-06	1.88741e-05	6.11152e-06	EGF/TP53/EDN1/INS/CCND1/IGF1/AKT1/EGFR	8
	BP	GO:1902893	regulation of pri-miRNA transcription by RNA polymerase II	2.10873e-06	1.89028e-05	6.12083e-06	TP53/STAT3/JUN/FOS	4
	BP	GO:1901216	positive regulation of neuron death	2.13332e-06	1.90335e-05	6.16315e-06	TP53/TNF/CASP3/JUN/FOS	5
	BP	GO:1901293	nucleoside phosphate biosynthetic process	2.13968e-06	1.90335e-05	6.16315e-06	TP53/INS/MAPK1/STAT3/HTR2A/IGF1/PTGS2/NOS3	8
	BP	GO:0007548	sex differentiation	2.14238e-06	1.90335e-05	6.16315e-06	ESR1/CCND1/CASP3/VEGFA/ICAM1/AR/NOS3	7
	BP	GO:0051196	regulation of coenzyme metabolic process	2.24812e-06	1.98551e-05	6.42918e-06	TP53/INS/STAT3/HTR2A/IGF1	5
	BP	GO:1903076	regulation of protein localization to plasma membrane	2.24812e-06	1.98551e-05	6.42918e-06	TNF/INS/AR/AKT1/EGFR	5
	BP	GO:0071073	positive regulation of phospholipid biosynthetic process	2.29628e-06	2.02208e-05	6.5476e-06	HTR2C/HTR2B/HTR2A	3
	BP	GO:0010959	regulation of metal ion transport	2.30822e-06	2.02663e-05	6.56234e-06	EGF/CCL2/F2/HTR2A/ICAM1/PTGS2/AKT1/NOS3	8
	BP	GO:0008585	female gonad development	2.36772e-06	2.06675e-05	6.69226e-06	ESR1/CASP3/VEGFA/ICAM1/NOS3	5
	BP	GO:2001169	regulation of ATP biosynthetic process	2.36772e-06	2.06675e-05	6.69226e-06	TP53/INS/STAT3/HTR2A/IGF1	5
	BP	GO:0043255	regulation of carbohydrate biosynthetic process	2.49228e-06	2.16915e-05	7.02384e-06	EGF/INS/HRH1/IGF1/AKT1	5
	BP	GO:0032881	regulation of polysaccharide metabolic process	2.56139e-06	2.22284e-05	7.19768e-06	EGF/INS/IGF1/AKT1	4
	BP	GO:0060047	heart contraction	2.72591e-06	2.35487e-05	7.6252e-06	OXT/ADRA1B/EDN1/ADRA1A/IL2/NOS3/EDN2	7
	BP	GO:0045785	positive regulation of cell adhesion	2.72926e-06	2.35487e-05	7.6252e-06	TNF/IL2/VEGFA/CCL2/ICAM1/IGF1/AKT1/IL6	8
	BP	GO:0046545	development of primary female sexual characteristics	3.043e-06	2.61803e-05	8.47734e-06	ESR1/CASP3/VEGFA/ICAM1/NOS3	5
	BP	GO:0019216	regulation of lipid metabolic process	3.1004e-06	2.65977e-05	8.61247e-06	TNF/HTR2C/INS/HTR2B/F2/HTR2A/PTGS2/AKT1	8
	BP	GO:0071354	cellular response to interleukin-6	3.37042e-06	2.88315e-05	9.33581e-06	STAT1/STAT3/ICAM1/IL6	4
	BP	GO:1903708	positive regulation of hemopoiesis	3.40403e-06	2.90361e-05	9.40205e-06	TNF/STAT1/IL2/STAT3/JUN/FOS	6
	BP	GO:0003015	heart process	3.43684e-06	2.92327e-05	9.4657e-06	OXT/ADRA1B/EDN1/ADRA1A/IL2/NOS3/EDN2	7
	BP	GO:0071887	leukocyte apoptotic process	3.5155e-06	2.9817e-05	9.65491e-06	TP53/IL2/CASP3/AKT1/IL6	5
	BP	GO:1905475	regulation of protein localization to membrane	3.62207e-06	3.06341e-05	9.9195e-06	TP53/TNF/INS/AR/AKT1/EGFR	6
	BP	GO:0061614	pri-miRNA transcription by RNA polymerase II	3.67795e-06	3.08196e-05	9.97956e-06	TP53/STAT3/JUN/FOS	4
	BP	GO:0070849	response to epidermal growth factor	3.67795e-06	3.08196e-05	9.97956e-06	MAPK1/MAPK3/AKT1/EGFR	4
	BP	GO:1903580	positive regulation of ATP metabolic process	3.67795e-06	3.08196e-05	9.97956e-06	INS/STAT3/HTR2A/IGF1	4
	BP	GO:0008593	regulation of Notch signaling pathway	3.68518e-06	3.08196e-05	9.97956e-06	EGF/STAT3/AKT1/NOS3/EGFR	5
	BP	GO:0048511	rhythmic process	3.84664e-06	3.19351e-05	1.03408e-05	OXTR/TP53/ESR1/CASP3/JUN/NOS3/EGFR	7
	BP	GO:0019362	pyridine nucleotide metabolic process	3.85136e-06	3.19351e-05	1.03408e-05	TP53/INS/STAT3/HTR2A/IGF1/PTGS2	6
	BP	GO:0046496	nicotinamide nucleotide metabolic process	3.85136e-06	3.19351e-05	1.03408e-05	TP53/INS/STAT3/HTR2A/IGF1/PTGS2	6
	BP	GO:0002286	T cell activation involved in immune response	3.86122e-06	3.19351e-05	1.03408e-05	TP53/IL2/STAT3/ICAM1/IL6	5
	BP	GO:0032386	regulation of intracellular transport	3.90429e-06	3.22023e-05	1.04273e-05	TP53/ADRA1A/HMOX1/MAPK1/HTR2A/MAPK3/CHRM1/PTGS2	8
	BP	GO:0051972	regulation of telomerase activity	4.00578e-06	3.28584e-05	1.06397e-05	TP53/MAPK1/MAPK3/MYC	4
	BP	GO:0090199	regulation of release of cytochrome c from mitochondria	4.00578e-06	3.28584e-05	1.06397e-05	TP53/IGF1/AKT1/MMP9	4
	BP	GO:0048568	embryonic organ development	4.25746e-06	3.48274e-05	1.12773e-05	TP53/TNF/EDN1/VEGFA/MAPK1/MAPK3/AKT1/EGFR	8
	BP	GO:0030857	negative regulation of epithelial cell differentiation	4.35476e-06	3.55263e-05	1.15036e-05	STAT1/CCND1/VEGFA/MMP9	4
	BP	GO:0072524	pyridine-containing compound metabolic process	4.61118e-06	3.75159e-05	1.21479e-05	TP53/INS/STAT3/HTR2A/IGF1/PTGS2	6
	BP	GO:0060326	cell chemotaxis	4.68721e-06	3.80312e-05	1.23147e-05	EDN1/VEGFA/CCL2/HRH1/MAPK3/EDN2/IL6	7
	BP	GO:0070741	response to interleukin-6	4.72573e-06	3.80435e-05	1.23187e-05	STAT1/STAT3/ICAM1/IL6	4
	BP	GO:0034349	glial cell apoptotic process	4.72685e-06	3.80435e-05	1.23187e-05	TP53/CASP3/CCL2	3
	BP	GO:0045073	regulation of chemokine biosynthetic process	4.72685e-06	3.80435e-05	1.23187e-05	TNF/HMOX1/IL6	3
	BP	GO:1904019	epithelial cell apoptotic process	4.84306e-06	3.88743e-05	1.25877e-05	TNF/HMOX1/CCL2/ICAM1/IL6	5
	BP	GO:0043279	response to alkaloid	5.061e-06	4.0515e-05	1.3119e-05	OXTR/OXT/CASP3/HTR2A/ICAM1	5
	BP	GO:0043200	response to amino acid	5.28656e-06	4.22079e-05	1.36671e-05	TNF/EDN1/CASP3/ICAM1/EGFR	5
	BP	GO:0006096	glycolytic process	5.7613e-06	4.56332e-05	1.47763e-05	TP53/INS/STAT3/HTR2A/IGF1	5
	BP	GO:0046660	female sex differentiation	5.7613e-06	4.56332e-05	1.47763e-05	ESR1/CASP3/VEGFA/ICAM1/NOS3	5
	BP	GO:1904375	regulation of protein localization to cell periphery	5.7613e-06	4.56332e-05	1.47763e-05	TNF/INS/AR/AKT1/EGFR	5
	BP	GO:0042033	chemokine biosynthetic process	5.80855e-06	4.56549e-05	1.47833e-05	TNF/HMOX1/IL6	3
	BP	GO:0050755	chemokine metabolic process	5.80855e-06	4.56549e-05	1.47833e-05	TNF/HMOX1/IL6	3
	BP	GO:0030278	regulation of ossification	5.80979e-06	4.56549e-05	1.47833e-05	OXT/TNF/MAPK1/MAPK3/IGF1/IL6	6
	BP	GO:0002573	myeloid leukocyte differentiation	5.97593e-06	4.66211e-05	1.50962e-05	TNF/VEGFA/JUN/FOS/MYC/MMP9	6
	BP	GO:0000186	activation of MAPKK activity	5.97946e-06	4.66211e-05	1.50962e-05	EGF/MAPK1/MAPK3/EGFR	4
	BP	GO:0045840	positive regulation of mitotic nuclear division	5.97946e-06	4.66211e-05	1.50962e-05	EGF/EDN1/INS/IGF1	4
	BP	GO:0006757	ATP generation from ADP	6.01088e-06	4.66232e-05	1.50969e-05	TP53/INS/STAT3/HTR2A/IGF1	5
	BP	GO:1900180	regulation of protein localization to nucleus	6.01088e-06	4.66232e-05	1.50969e-05	INS/MAPK1/F2/PTGS2/AKT1	5
	BP	GO:0007613	memory	6.26885e-06	4.84985e-05	1.57041e-05	OXTR/OXT/HRH1/HTR2A/PTGS2	5
	BP	GO:0052547	regulation of peptidase activity	6.35546e-06	4.90419e-05	1.588e-05	TNF/VEGFA/STAT3/MAPK3/MYC/PTGS2/AKT1/MMP9	8
	BP	GO:0006733	oxidoreduction coenzyme metabolic process	6.49767e-06	5.00103e-05	1.61936e-05	TP53/INS/STAT3/HTR2A/IGF1/PTGS2	6
	BP	GO:0042866	pyruvate biosynthetic process	6.8108e-06	5.21522e-05	1.68872e-05	TP53/INS/STAT3/HTR2A/IGF1	5
	BP	GO:0051193	regulation of cofactor metabolic process	6.8108e-06	5.21522e-05	1.68872e-05	TP53/INS/STAT3/HTR2A/IGF1	5
	BP	GO:0002697	regulation of immune effector process	6.99917e-06	5.34579e-05	1.731e-05	TNF/STAT1/INS/IL2/HMOX1/F2/MAPK3/IL6	8
	BP	GO:0045725	positive regulation of glycogen biosynthetic process	7.0422e-06	5.36171e-05	1.73615e-05	INS/IGF1/AKT1	3
	BP	GO:0043523	regulation of neuron apoptotic process	7.05583e-06	5.36171e-05	1.73615e-05	TP53/TNF/CASP3/HMOX1/CCL2/JUN	6
	BP	GO:0023061	signal release	7.45833e-06	5.62864e-05	1.82258e-05	TNF/HTR2C/EDN1/ADRA1A/INS/HTR2A/IL6/EGFR	8
	BP	GO:0060688	regulation of morphogenesis of a branching structure	7.46349e-06	5.62864e-05	1.82258e-05	TNF/ESR1/VEGFA/AR	4
	BP	GO:0090183	regulation of kidney development	7.46349e-06	5.62864e-05	1.82258e-05	STAT1/VEGFA/MYC/MMP9	4
	BP	GO:0002683	negative regulation of immune system process	7.57703e-06	5.6999e-05	1.84566e-05	TNF/INS/IL2/CASP3/HMOX1/CCL2/MYC/AKT1	8
	BP	GO:0034101	erythrocyte homeostasis	7.69182e-06	5.74297e-05	1.85961e-05	STAT1/CASP3/HMOX1/VEGFA/STAT3	5
	BP	GO:0043500	muscle adaptation	7.69182e-06	5.74297e-05	1.85961e-05	EDN1/ADRA1A/HMOX1/IGF1/NOS3	5
	BP	GO:1903578	regulation of ATP metabolic process	7.69182e-06	5.74297e-05	1.85961e-05	TP53/INS/STAT3/HTR2A/IGF1	5
	BP	GO:0071621	granulocyte chemotaxis	8.00451e-06	5.94299e-05	1.92437e-05	EDN1/CCL2/HRH1/MAPK3/EDN2	5
	BP	GO:0043525	positive regulation of neuron apoptotic process	8.01371e-06	5.94299e-05	1.92437e-05	TP53/TNF/CASP3/JUN	4
	BP	GO:0051235	maintenance of location	8.01927e-06	5.94299e-05	1.92437e-05	TNF/HTR2C/HTR2B/F2/HTR2A/AKT1/IL6	7
	BP	GO:0043281	regulation of cysteine-type endopeptidase activity involved in apoptotic process	8.07228e-06	5.96751e-05	1.93231e-05	TNF/VEGFA/MYC/PTGS2/AKT1/MMP9	6
	BP	GO:0071214	cellular response to abiotic stimulus	8.179e-06	6.01669e-05	1.94824e-05	TP53/CASP3/MAPK3/MYC/PTGS2/AKT1/EGFR	7
	BP	GO:0104004	cellular response to environmental stimulus	8.179e-06	6.01669e-05	1.94824e-05	TP53/CASP3/MAPK3/MYC/PTGS2/AKT1/EGFR	7
	BP	GO:0008637	apoptotic mitochondrial changes	8.32706e-06	6.09565e-05	1.97381e-05	TP53/JUN/IGF1/AKT1/MMP9	5
	BP	GO:0051101	regulation of DNA binding	8.32706e-06	6.09565e-05	1.97381e-05	EGF/HMOX1/JUN/IGF1/MMP9	5
	BP	GO:0035994	response to muscle stretch	8.4374e-06	6.13145e-05	1.9854e-05	EDN1/JUN/FOS	3
	BP	GO:0051023	regulation of immunoglobulin secretion	8.4374e-06	6.13145e-05	1.9854e-05	TNF/IL2/IL6	3
	BP	GO:0070875	positive regulation of glycogen metabolic process	8.4374e-06	6.13145e-05	1.9854e-05	INS/IGF1/AKT1	3
	BP	GO:0050920	regulation of chemotaxis	8.51074e-06	6.16977e-05	1.99781e-05	EDN1/VEGFA/CCL2/MAPK3/EDN2/IL6	6
	BP	GO:0061900	glial cell activation	8.59332e-06	6.21459e-05	2.01232e-05	TNF/JUN/IL6/EGFR	4
	BP	GO:0050708	regulation of protein secretion	8.71929e-06	6.2882e-05	2.03615e-05	TNF/INS/IL2/HTR2B/MAPK3/IGF1/IL6/EGFR	8
	BP	GO:0019722	calcium-mediated signaling	8.73711e-06	6.2882e-05	2.03615e-05	TNF/EDN1/HTR2B/IGF1/EDN2/EGFR	6
	BP	GO:0046031	ADP metabolic process	9.00264e-06	6.46377e-05	2.093e-05	TP53/INS/STAT3/HTR2A/IGF1	5
	BP	GO:0097755	positive regulation of blood vessel diameter	9.2033e-06	6.59203e-05	2.13453e-05	INS/HMOX1/NOS3/EGFR	4
	BP	GO:0046324	regulation of glucose import	9.84464e-06	7.03457e-05	2.27783e-05	TNF/INS/IGF1/AKT1	4
	BP	GO:0071071	regulation of phospholipid biosynthetic process	1.00037e-05	7.11429e-05	2.30365e-05	HTR2C/HTR2B/HTR2A	3
	BP	GO:1903798	regulation of production of miRNAs involved in gene silencing by miRNA	1.00037e-05	7.11429e-05	2.30365e-05	TP53/ESR1/EGFR	3
	BP	GO:0034248	regulation of cellular amide metabolic process	1.03104e-05	7.31503e-05	2.36865e-05	TNF/CASP3/MAPK1/STAT3/MAPK3/IGF1/AKT1/IL6	8
	BP	GO:0010721	negative regulation of cell development	1.05084e-05	7.42735e-05	2.40502e-05	TP53/TNF/VEGFA/STAT3/F2/IGF1/IL6	7
	BP	GO:1905953	negative regulation of lipid localization	1.05184e-05	7.42735e-05	2.40502e-05	EGF/TNF/AKT1/IL6	4
	BP	GO:0048638	regulation of developmental growth	1.11176e-05	7.83201e-05	2.53605e-05	EDN1/VEGFA/MAPK1/STAT3/AR/IGF1/AKT1	7
	BP	GO:0010676	positive regulation of cellular carbohydrate metabolic process	1.12255e-05	7.88945e-05	2.55465e-05	INS/HRH1/IGF1/AKT1	4
	BP	GO:0010594	regulation of endothelial cell migration	1.15659e-05	8.10965e-05	2.62595e-05	EDN1/HMOX1/VEGFA/PTGS2/AKT1/NOS3	6
	BP	GO:0051767	nitric-oxide synthase biosynthetic process	1.17507e-05	8.20082e-05	2.65547e-05	EDN1/STAT1/CCL2	3
	BP	GO:0051769	regulation of nitric-oxide synthase biosynthetic process	1.17507e-05	8.20082e-05	2.65547e-05	EDN1/STAT1/CCL2	3
	BP	GO:0007588	excretion	1.1967e-05	8.31306e-05	2.69181e-05	OXT/EDN1/ADRA1A/HMOX1	4
	BP	GO:0046622	positive regulation of organ growth	1.1967e-05	8.31306e-05	2.69181e-05	EDN1/MAPK1/IGF1/AKT1	4
	BP	GO:0006165	nucleoside diphosphate phosphorylation	1.21452e-05	8.39788e-05	2.71928e-05	TP53/INS/STAT3/HTR2A/IGF1	5
	BP	GO:0046683	response to organophosphorus	1.21452e-05	8.39788e-05	2.71928e-05	OXT/STAT1/JUN/FOS/PTGS2	5
	BP	GO:0006914	autophagy	1.25012e-05	8.6043e-05	2.78612e-05	TP53/ADRA1A/HTR2B/CASP3/HMOX1/STAT3/MAPK3/AKT1	8
	BP	GO:0061919	process utilizing autophagic mechanism	1.25012e-05	8.6043e-05	2.78612e-05	TP53/ADRA1A/HTR2B/CASP3/HMOX1/STAT3/MAPK3/AKT1	8
	BP	GO:0050921	positive regulation of chemotaxis	1.25915e-05	8.64657e-05	2.79981e-05	EDN1/VEGFA/MAPK3/EDN2/IL6	5
	BP	GO:0046939	nucleotide phosphorylation	1.30505e-05	8.94126e-05	2.89523e-05	TP53/INS/STAT3/HTR2A/IGF1	5
	BP	GO:0046777	protein autophosphorylation	1.33964e-05	9.15727e-05	2.96517e-05	INS/VEGFA/JUN/MAPK3/AKT1/EGFR	6
	BP	GO:0014821	phasic smooth muscle contraction	1.36877e-05	9.31383e-05	3.01587e-05	EDN1/HTR2B/EDN2	3
	BP	GO:0070920	regulation of production of small RNA involved in gene silencing by RNA	1.36877e-05	9.31383e-05	3.01587e-05	TP53/ESR1/EGFR	3
	BP	GO:0009135	purine nucleoside diphosphate metabolic process	1.40077e-05	9.48847e-05	3.07242e-05	TP53/INS/STAT3/HTR2A/IGF1	5
	BP	GO:0009179	purine ribonucleoside diphosphate metabolic process	1.40077e-05	9.48847e-05	3.07242e-05	TP53/INS/STAT3/HTR2A/IGF1	5
	BP	GO:0043122	regulation of I-kappaB kinase/NF-kappaB signaling	1.40562e-05	9.49984e-05	3.0761e-05	TNF/ESR1/STAT1/HTR2B/HMOX1/AKT1	6
	BP	GO:0051785	positive regulation of nuclear division	1.44089e-05	9.71626e-05	3.14618e-05	EGF/EDN1/INS/IGF1	4
	BP	GO:0002700	regulation of production of molecular mediator of immune response	1.45064e-05	9.76002e-05	3.16035e-05	TNF/IL2/HMOX1/MAPK3/IL6	5
	BP	GO:0051402	neuron apoptotic process	1.47421e-05	9.87422e-05	3.19733e-05	TP53/TNF/CASP3/HMOX1/CCL2/JUN	6
	BP	GO:2000116	regulation of cysteine-type endopeptidase activity	1.47421e-05	9.87422e-05	3.19733e-05	TNF/VEGFA/MYC/PTGS2/AKT1/MMP9	6
	BP	GO:0045861	negative regulation of proteolysis	1.48845e-05	9.94734e-05	3.221e-05	TP53/INS/VEGFA/F2/PTGS2/AKT1/MMP9	7
	BP	GO:0009185	ribonucleoside diphosphate metabolic process	1.50188e-05	0.000100148	3.24284e-05	TP53/INS/STAT3/HTR2A/IGF1	5
	BP	GO:0042108	positive regulation of cytokine biosynthetic process	1.52988e-05	0.000101788	3.29595e-05	TNF/HMOX1/STAT3/IL6	4
	BP	GO:0032102	negative regulation of response to external stimulus	1.5422e-05	0.00010238	3.31512e-05	EDN1/INS/IL2/CCL2/F2/IGF1/NOS3	7
	BP	GO:0097530	granulocyte migration	1.55453e-05	0.00010297	3.33423e-05	EDN1/CCL2/HRH1/MAPK3/EDN2	5
	BP	GO:0044321	response to leptin	1.58241e-05	0.000104355	3.37908e-05	EDN1/CCND1/STAT3	3
	BP	GO:0048305	immunoglobulin secretion	1.58241e-05	0.000104355	3.37908e-05	TNF/IL2/IL6	3
	BP	GO:0038127	ERBB signaling pathway	1.6086e-05	0.000105849	3.42746e-05	EGF/MAPK1/AKT1/MMP9/EGFR	5
	BP	GO:0046323	glucose import	1.62286e-05	0.000106553	3.45025e-05	TNF/INS/IGF1/AKT1	4
	BP	GO:0051896	regulation of protein kinase B signaling	1.65758e-05	0.000108595	3.51637e-05	EGF/TNF/ESR1/INS/AKT1/EGFR	6
	BP	GO:0006606	protein import into nucleus	1.66413e-05	0.000108786	3.52256e-05	TP53/MAPK1/STAT3/PTGS2/AKT1	5
	BP	GO:0051098	regulation of binding	1.77357e-05	0.000115687	3.74602e-05	EGF/HMOX1/JUN/MAPK3/IGF1/AKT1/MMP9	7
	BP	GO:0045821	positive regulation of glycolytic process	1.81692e-05	0.000117746	3.81267e-05	INS/HTR2A/IGF1	3
	BP	GO:0050995	negative regulation of lipid catabolic process	1.81692e-05	0.000117746	3.81267e-05	TNF/INS/AKT1	3
	BP	GO:2000637	positive regulation of gene silencing by miRNA	1.81692e-05	0.000117746	3.81267e-05	TP53/STAT3/EGFR	3
	BP	GO:0042542	response to hydrogen peroxide	1.83974e-05	0.000118711	3.84391e-05	STAT1/CASP3/HMOX1/JUN/IL6	5
	BP	GO:2000241	regulation of reproductive process	1.83974e-05	0.000118711	3.84391e-05	OXTR/OXT/ESR1/AR/IGF1	5
	BP	GO:0006352	DNA-templated transcription, initiation	1.85898e-05	0.000119694	3.87576e-05	TP53/ESR1/CCND1/JUN/MAPK3/AR	6
	BP	GO:0010212	response to ionizing radiation	1.90137e-05	0.00012191	3.94751e-05	TP53/CCND1/CASP3/ICAM1/MYC	5
	BP	GO:0030072	peptide hormone secretion	1.90153e-05	0.00012191	3.94751e-05	TNF/HTR2C/EDN1/INS/IL6/EGFR	6
	BP	GO:0045637	regulation of myeloid cell differentiation	1.94487e-05	0.000124422	4.02885e-05	TNF/STAT1/STAT3/JUN/FOS/MYC	6
	BP	GO:0051592	response to calcium ion	1.9646e-05	0.000125416	4.06105e-05	EDN1/CCND1/JUN/FOS/EGFR	5
	BP	GO:0014074	response to purine-containing compound	2.02946e-05	0.000128926	4.17469e-05	OXT/STAT1/JUN/FOS/PTGS2	5
	BP	GO:0051092	positive regulation of NF-kappaB transcription factor activity	2.02946e-05	0.000128926	4.17469e-05	TNF/INS/STAT3/ICAM1/AR	5
	BP	GO:0038034	signal transduction in absence of ligand	2.03681e-05	0.000128926	4.17469e-05	TNF/IL2/CASP3/AKT1	4
	BP	GO:0097192	extrinsic apoptotic signaling pathway in absence of ligand	2.03681e-05	0.000128926	4.17469e-05	TNF/IL2/CASP3/AKT1	4
	BP	GO:0046697	decidualization	2.07323e-05	0.000130679	4.23146e-05	MAPK1/MAPK3/PTGS2	3
	BP	GO:0060148	positive regulation of posttranscriptional gene silencing	2.07323e-05	0.000130679	4.23146e-05	TP53/STAT3/EGFR	3
	BP	GO:0051924	regulation of calcium ion transport	2.0797e-05	0.000130811	4.23575e-05	EGF/CCL2/F2/ICAM1/PTGS2/NOS3	6
	BP	GO:0045765	regulation of angiogenesis	2.10251e-05	0.000131969	4.27323e-05	STAT1/HMOX1/VEGFA/STAT3/PTGS2/NOS3/IL6	7
	BP	GO:0006801	superoxide metabolic process	2.15138e-05	0.000134472	4.35429e-05	TNF/EDN1/NOS3/EGFR	4
	BP	GO:0043627	response to estrogen	2.15138e-05	0.000134472	4.35429e-05	ESR1/CCND1/HMOX1/MAPK1	4
	BP	GO:0000187	activation of MAPK activity	2.23409e-05	0.000139062	4.5029e-05	EGF/TNF/MAPK1/MAPK3/IGF1	5
	BP	GO:0001890	placenta development	2.23409e-05	0.000139062	4.5029e-05	MAPK1/MAPK3/PTGS2/AKT1/EGFR	5
	BP	GO:0030168	platelet activation	2.30576e-05	0.000142633	4.61853e-05	MAPK1/F2/MAPK3/NOS3/IL6	5
	BP	GO:0034250	positive regulation of cellular amide metabolic process	2.30576e-05	0.000142633	4.61853e-05	TNF/CASP3/MAPK1/MAPK3/IL6	5
	BP	GO:0050729	positive regulation of inflammatory response	2.30576e-05	0.000142633	4.61853e-05	TNF/IL2/PTGS2/IL6/EGFR	5
	BP	GO:0002053	positive regulation of mesenchymal cell proliferation	2.35226e-05	0.000144613	4.68265e-05	STAT1/VEGFA/MYC	3
	BP	GO:0030813	positive regulation of nucleotide catabolic process	2.35226e-05	0.000144613	4.68265e-05	INS/HTR2A/IGF1	3
	BP	GO:0051197	positive regulation of coenzyme metabolic process	2.35226e-05	0.000144613	4.68265e-05	INS/HTR2A/IGF1	3
	BP	GO:0006090	pyruvate metabolic process	2.3792e-05	0.000145969	4.72657e-05	TP53/INS/STAT3/HTR2A/IGF1	5
	BP	GO:0009108	coenzyme biosynthetic process	2.4238e-05	0.000148402	4.80533e-05	TP53/INS/STAT3/HTR2A/IGF1/PTGS2	6
	BP	GO:0030856	regulation of epithelial cell differentiation	2.53153e-05	0.000154367	4.99847e-05	TNF/STAT1/CCND1/VEGFA/MMP9	5
	BP	GO:0043535	regulation of blood vessel endothelial cell migration	2.53153e-05	0.000154367	4.99847e-05	HMOX1/VEGFA/PTGS2/AKT1/NOS3	5
	BP	GO:0002360	T cell lineage commitment	2.65491e-05	0.000160907	5.21026e-05	TP53/STAT3/IL6	3
	BP	GO:0010460	positive regulation of heart rate	2.65491e-05	0.000160907	5.21026e-05	EDN1/ADRA1A/EDN2	3
	BP	GO:0072539	T-helper 17 cell differentiation	2.65491e-05	0.000160907	5.21026e-05	IL2/STAT3/IL6	3
	BP	GO:0009132	nucleoside diphosphate metabolic process	2.69134e-05	0.000162457	5.26046e-05	TP53/INS/STAT3/HTR2A/IGF1	5
	BP	GO:0060402	calcium ion transport into cytosol	2.69134e-05	0.000162457	5.26046e-05	HTR2C/ADRA1A/HTR2B/F2/HTR2A	5
	BP	GO:0002673	regulation of acute inflammatory response	2.77414e-05	0.000167118	5.41137e-05	TNF/INS/F2/PTGS2/IL6	5
	BP	GO:0000271	polysaccharide biosynthetic process	2.79661e-05	0.000168134	5.44426e-05	EGF/INS/IGF1/AKT1	4
	BP	GO:0031334	positive regulation of protein complex assembly	2.81241e-05	0.000168745	5.46405e-05	TP53/TNF/ESR1/VEGFA/JUN/ICAM1	6
	BP	GO:0006754	ATP biosynthetic process	2.8589e-05	0.000171191	5.54325e-05	TP53/INS/STAT3/HTR2A/IGF1	5
	BP	GO:0007249	I-kappaB kinase/NF-kappaB signaling	2.87181e-05	0.00017162	5.55717e-05	TNF/ESR1/STAT1/HTR2B/HMOX1/AKT1	6
	BP	GO:0071260	cellular response to mechanical stimulus	2.94097e-05	0.000175404	5.67968e-05	MAPK3/PTGS2/AKT1/EGFR	4
	BP	GO:0002026	regulation of the force of heart contraction	2.9821e-05	0.000176103	5.70231e-05	ADRA1A/NOS3/EDN2	3
	BP	GO:0009651	response to salt stress	2.9821e-05	0.000176103	5.70231e-05	OXT/TP53/TNF	3
	BP	GO:0048143	astrocyte activation	2.9821e-05	0.000176103	5.70231e-05	TNF/IL6/EGFR	3
	BP	GO:2000144	positive regulation of DNA-templated transcription, initiation	2.9821e-05	0.000176103	5.70231e-05	TP53/ESR1/JUN	3
	BP	GO:2000191	regulation of fatty acid transport	2.9821e-05	0.000176103	5.70231e-05	OXT/EDN1/AKT1	3
	BP	GO:0043900	regulation of multi-organism process	3.00629e-05	0.000177181	5.73723e-05	OXTR/OXT/TNF/STAT1/JUN/MAPK3/IGF1	7
	BP	GO:0043542	endothelial cell migration	3.11957e-05	0.000183474	5.94099e-05	EDN1/HMOX1/VEGFA/PTGS2/AKT1/NOS3	6
	BP	GO:0051170	import into nucleus	3.12531e-05	0.000183474	5.94099e-05	TP53/MAPK1/STAT3/PTGS2/AKT1	5
	BP	GO:0110110	positive regulation of animal organ morphogenesis	3.246e-05	0.000190034	6.15341e-05	EDN1/VEGFA/MYC/AR	4
	BP	GO:0043270	positive regulation of ion transport	3.24975e-05	0.000190034	6.15341e-05	OXT/EDN1/CCL2/F2/CHRM1/AKT1	6
	BP	GO:2001242	regulation of intrinsic apoptotic signaling pathway	3.31336e-05	0.000193118	6.25325e-05	TP53/INS/PTGS2/AKT1/MMP9	5
	BP	GO:0001516	prostaglandin biosynthetic process	3.33473e-05	0.000193118	6.25325e-05	EDN1/PTGS2/EDN2	3
	BP	GO:0033598	mammary gland epithelial cell proliferation	3.33473e-05	0.000193118	6.25325e-05	ESR1/CCND1/MAPK1	3
	BP	GO:0046457	prostanoid biosynthetic process	3.33473e-05	0.000193118	6.25325e-05	EDN1/PTGS2/EDN2	3
	BP	GO:1902003	regulation of amyloid-beta formation	3.33473e-05	0.000193118	6.25325e-05	TNF/CASP3/IGF1	3
	BP	GO:0000082	G1/S transition of mitotic cell cycle	3.52323e-05	0.00020364	6.59397e-05	TP53/CCND1/CCL2/MYC/AKT1/EGFR	6
	BP	GO:0005979	regulation of glycogen biosynthetic process	3.71369e-05	0.000212596	6.88398e-05	INS/IGF1/AKT1	3
	BP	GO:0010962	regulation of glucan biosynthetic process	3.71369e-05	0.000212596	6.88398e-05	INS/IGF1/AKT1	3
	BP	GO:0070102	interleukin-6-mediated signaling pathway	3.71369e-05	0.000212596	6.88398e-05	STAT1/STAT3/IL6	3
	BP	GO:0070528	protein kinase C signaling	3.71369e-05	0.000212596	6.88398e-05	ADRA1A/HTR2B/VEGFA	3
	BP	GO:0072538	T-helper 17 type immune response	3.71369e-05	0.000212596	6.88398e-05	IL2/STAT3/IL6	3
	BP	GO:0002718	regulation of cytokine production involved in immune response	3.74618e-05	0.000213233	6.90461e-05	TNF/HMOX1/MAPK3/IL6	4
	BP	GO:0043154	negative regulation of cysteine-type endopeptidase activity involved in apoptotic process	3.74618e-05	0.000213233	6.90461e-05	VEGFA/PTGS2/AKT1/MMP9	4
	BP	GO:0050886	endocrine process	3.74618e-05	0.000213233	6.90461e-05	OXTR/EDN1/NOS3/EDN2	4
	BP	GO:1901342	regulation of vasculature development	3.90596e-05	0.000221906	7.18544e-05	STAT1/HMOX1/VEGFA/STAT3/PTGS2/NOS3/IL6	7
	BP	GO:0009206	purine ribonucleoside triphosphate biosynthetic process	3.93064e-05	0.000222044	7.18991e-05	TP53/INS/STAT3/HTR2A/IGF1	5
	BP	GO:0016241	regulation of macroautophagy	3.93064e-05	0.000222044	7.18991e-05	TP53/CASP3/HMOX1/MAPK3/AKT1	5
	BP	GO:0060401	cytosolic calcium ion transport	3.93064e-05	0.000222044	7.18991e-05	HTR2C/ADRA1A/HTR2B/F2/HTR2A	5
	BP	GO:0009145	purine nucleoside triphosphate biosynthetic process	4.04164e-05	0.000227712	7.37344e-05	TP53/INS/STAT3/HTR2A/IGF1	5
	BP	GO:0044262	cellular carbohydrate metabolic process	4.04619e-05	0.000227712	7.37344e-05	TP53/INS/STAT3/HRH1/IGF1/AKT1	6
	BP	GO:0052548	regulation of endopeptidase activity	4.08565e-05	0.000229125	7.41918e-05	TNF/VEGFA/STAT3/MYC/PTGS2/AKT1/MMP9	7
	BP	GO:0001776	leukocyte homeostasis	4.10955e-05	0.000229125	7.41918e-05	IL2/CASP3/AKT1/IL6	4
	BP	GO:0008625	extrinsic apoptotic signaling pathway via death domain receptors	4.10955e-05	0.000229125	7.41918e-05	TNF/HMOX1/ICAM1/NOS3	4
	BP	GO:0042058	regulation of epidermal growth factor receptor signaling pathway	4.10955e-05	0.000229125	7.41918e-05	EGF/AKT1/MMP9/EGFR	4
	BP	GO:0070542	response to fatty acid	4.10955e-05	0.000229125	7.41918e-05	OXT/EDN1/PTGS2/AKT1	4
	BP	GO:0097421	liver regeneration	4.11986e-05	0.000229273	7.42397e-05	CCND1/HMOX1/EGFR	3
	BP	GO:0006112	energy reserve metabolic process	4.3006e-05	0.000238444	7.72096e-05	INS/MYC/IGF1/AKT1	4
	BP	GO:0014068	positive regulation of phosphatidylinositol 3-kinase signaling	4.3006e-05	0.000238444	7.72096e-05	TNF/INS/F2/IGF1	4
	BP	GO:0034103	regulation of tissue remodeling	4.49807e-05	0.000247911	8.02749e-05	TP53/IL2/IL6/EGFR	4
	BP	GO:0097194	execution phase of apoptosis	4.49807e-05	0.000247911	8.02749e-05	TP53/CASP3/AKT1/IL6	4
	BP	GO:0051897	positive regulation of protein kinase B signaling	4.51017e-05	0.000247911	8.02749e-05	EGF/TNF/ESR1/INS/EGFR	5
	BP	GO:0009410	response to xenobiotic stimulus	4.54252e-05	0.000247911	8.02749e-05	OXTR/OXT/EDN1/HTR2A/ICAM1/EGFR	6
	BP	GO:0002675	positive regulation of acute inflammatory response	4.55414e-05	0.000247911	8.02749e-05	TNF/PTGS2/IL6	3
	BP	GO:0010165	response to X-ray	4.55414e-05	0.000247911	8.02749e-05	TP53/CCND1/CASP3	3
	BP	GO:0034694	response to prostaglandin	4.55414e-05	0.000247911	8.02749e-05	OXT/EDN1/AKT1	3
	BP	GO:0045737	positive regulation of cyclin-dependent protein serine/threonine kinase activity	4.55414e-05	0.000247911	8.02749e-05	CCND1/AKT1/EGFR	3
	BP	GO:0045742	positive regulation of epidermal growth factor receptor signaling pathway	4.55414e-05	0.000247911	8.02749e-05	EGF/AKT1/MMP9	3
	BP	GO:0071880	adenylate cyclase-activating adrenergic receptor signaling pathway	4.55414e-05	0.000247911	8.02749e-05	ADRA1B/ADRA1D/ADRA1A	3
	BP	GO:0051146	striated muscle cell differentiation	4.6298e-05	0.000251323	8.13798e-05	EDN1/ADRA1A/CASP3/VEGFA/IGF1/AKT1	6
	BP	GO:0009201	ribonucleoside triphosphate biosynthetic process	4.63361e-05	0.000251323	8.13798e-05	TP53/INS/STAT3/HTR2A/IGF1	5
	BP	GO:0007193	adenylate cyclase-inhibiting G protein-coupled receptor signaling pathway	4.70209e-05	0.000254116	8.22843e-05	EDN1/EDNRA/CHRM1/CHRM3	4
	BP	GO:0055013	cardiac muscle cell development	4.70209e-05	0.000254116	8.22843e-05	EDN1/ADRA1A/VEGFA/IGF1	4
	BP	GO:0060249	anatomical structure homeostasis	4.87388e-05	0.00026276	8.5083e-05	VEGFA/MAPK1/MAPK3/MYC/NOS3/IL6/EGFR	7
	BP	GO:0048771	tissue remodeling	4.88835e-05	0.00026276	8.5083e-05	TP53/IL2/NOS3/IL6/EGFR	5
	BP	GO:0071347	cellular response to interleukin-1	4.88835e-05	0.00026276	8.5083e-05	EDN1/CCL2/ICAM1/MAPK3/IL6	5
	BP	GO:0071674	mononuclear cell migration	4.91279e-05	0.0002636	8.53553e-05	TNF/CCL2/MAPK3/IL6	4
	BP	GO:0001569	branching involved in blood vessel morphogenesis	5.0174e-05	0.000266472	8.62851e-05	EDN1/EDNRA/VEGFA	3
	BP	GO:0001975	response to amphetamine	5.0174e-05	0.000266472	8.62851e-05	OXTR/OXT/ICAM1	3
	BP	GO:0051385	response to mineralocorticoid	5.0174e-05	0.000266472	8.62851e-05	EDN1/CCND1/FOS	3
	BP	GO:0043534	blood vessel endothelial cell migration	5.01971e-05	0.000266472	8.62851e-05	HMOX1/VEGFA/PTGS2/AKT1/NOS3	5
	BP	GO:0071346	cellular response to interferon-gamma	5.01971e-05	0.000266472	8.62851e-05	TP53/EDN1/STAT1/CCL2/ICAM1	5
	BP	GO:1905330	regulation of morphogenesis of an epithelium	5.01971e-05	0.000266472	8.62851e-05	TNF/ESR1/STAT1/VEGFA/AR	5
	BP	GO:0044843	cell cycle G1/S phase transition	5.0866e-05	0.000269545	8.72801e-05	TP53/CCND1/CCL2/MYC/AKT1/EGFR	6
	BP	GO:0002285	lymphocyte activation involved in immune response	5.1538e-05	0.000272623	8.82769e-05	TP53/IL2/STAT3/ICAM1/IL6	5
	BP	GO:0006164	purine nucleotide biosynthetic process	5.27915e-05	0.000278761	9.02645e-05	TP53/INS/STAT3/HTR2A/IGF1/NOS3	6
	BP	GO:0009166	nucleotide catabolic process	5.29064e-05	0.000278876	9.03016e-05	TP53/INS/STAT3/HTR2A/IGF1	5
	BP	GO:2000117	negative regulation of cysteine-type endopeptidase activity	5.3548e-05	0.000281762	9.12361e-05	VEGFA/PTGS2/AKT1/MMP9	4
	BP	GO:0009127	purine nucleoside monophosphate biosynthetic process	5.43027e-05	0.000284733	9.2198e-05	TP53/INS/STAT3/HTR2A/IGF1	5
	BP	GO:0009168	purine ribonucleoside monophosphate biosynthetic process	5.43027e-05	0.000284733	9.2198e-05	TP53/INS/STAT3/HTR2A/IGF1	5
	BP	GO:0010464	regulation of mesenchymal cell proliferation	5.51051e-05	0.000286431	9.27481e-05	STAT1/VEGFA/MYC	3
	BP	GO:0016242	negative regulation of macroautophagy	5.51051e-05	0.000286431	9.27481e-05	TP53/HMOX1/AKT1	3
	BP	GO:0042755	eating behavior	5.51051e-05	0.000286431	9.27481e-05	OXTR/OXT/STAT3	3
	BP	GO:0051194	positive regulation of cofactor metabolic process	5.51051e-05	0.000286431	9.27481e-05	INS/HTR2A/IGF1	3
	BP	GO:1901186	positive regulation of ERBB signaling pathway	5.51051e-05	0.000286431	9.27481e-05	EGF/AKT1/MMP9	3
	BP	GO:0042098	T cell proliferation	5.57274e-05	0.000287876	9.32158e-05	TP53/IL2/CASP3/IGF1/IL6	5
	BP	GO:0048639	positive regulation of developmental growth	5.57274e-05	0.000287876	9.32158e-05	EDN1/VEGFA/MAPK1/IGF1/AKT1	5
	BP	GO:2000045	regulation of G1/S transition of mitotic cell cycle	5.57274e-05	0.000287876	9.32158e-05	TP53/CCND1/CCL2/AKT1/EGFR	5
	BP	GO:1901184	regulation of ERBB signaling pathway	5.58637e-05	0.000287876	9.32158e-05	EGF/AKT1/MMP9/EGFR	4
	BP	GO:1901655	cellular response to ketone	5.58637e-05	0.000287876	9.32158e-05	ICAM1/AR/AKT1/EGFR	4
	BP	GO:0032148	activation of protein kinase B activity	6.03433e-05	0.000309363	0.000100173	INS/IGF1/AKT1	3
	BP	GO:0034205	amyloid-beta formation	6.03433e-05	0.000309363	0.000100173	TNF/CASP3/IGF1	3
	BP	GO:0071875	adrenergic receptor signaling pathway	6.03433e-05	0.000309363	0.000100173	ADRA1B/ADRA1D/ADRA1A	3
	BP	GO:0042116	macrophage activation	6.07134e-05	0.000310198	0.000100444	TNF/JUN/EDN2/IL6	4
	BP	GO:0055006	cardiac cell development	6.07134e-05	0.000310198	0.000100444	EDN1/ADRA1A/VEGFA/IGF1	4
	BP	GO:0009142	nucleoside triphosphate biosynthetic process	6.17176e-05	0.000314256	0.000101758	TP53/INS/STAT3/HTR2A/IGF1	5
	BP	GO:1901292	nucleoside phosphate catabolic process	6.17176e-05	0.000314256	0.000101758	TP53/INS/STAT3/HTR2A/IGF1	5
	BP	GO:0010660	regulation of muscle cell apoptotic process	6.32502e-05	0.000320968	0.000103931	TP53/EDN1/HMOX1/IGF1	4
	BP	GO:0097327	response to antineoplastic agent	6.32502e-05	0.000320968	0.000103931	EDN1/HMOX1/ICAM1/EGFR	4
	BP	GO:0046879	hormone secretion	6.56085e-05	0.000331034	0.000107191	TNF/HTR2C/EDN1/INS/IL6/EGFR	6
	BP	GO:0051591	response to cAMP	6.58634e-05	0.000331034	0.000107191	OXT/STAT1/JUN/FOS	4
	BP	GO:0060251	regulation of glial cell proliferation	6.58972e-05	0.000331034	0.000107191	TNF/CHRM1/IL6	3
	BP	GO:0070873	regulation of glycogen metabolic process	6.58972e-05	0.000331034	0.000107191	INS/IGF1/AKT1	3
	BP	GO:1902991	regulation of amyloid precursor protein catabolic process	6.58972e-05	0.000331034	0.000107191	TNF/CASP3/IGF1	3
	BP	GO:1904031	positive regulation of cyclin-dependent protein kinase activity	6.58972e-05	0.000331034	0.000107191	CCND1/AKT1/EGFR	3
	BP	GO:0072522	purine-containing compound biosynthetic process	6.67798e-05	0.000334906	0.000108444	TP53/INS/STAT3/HTR2A/IGF1/NOS3	6
	BP	GO:0050863	regulation of T cell activation	6.79678e-05	0.000340294	0.000110189	IL2/CASP3/CCL2/IGF1/AKT1/IL6	6
	BP	GO:0043112	receptor metabolic process	6.81937e-05	0.000340855	0.000110371	EGF/TNF/EDN1/HTR2B/VEGFA	5
	BP	GO:0002042	cell migration involved in sprouting angiogenesis	6.85545e-05	0.000341518	0.000110585	HMOX1/VEGFA/PTGS2/AKT1	4
	BP	GO:2001243	negative regulation of intrinsic apoptotic signaling pathway	6.85545e-05	0.000341518	0.000110585	INS/PTGS2/AKT1/MMP9	4
	BP	GO:0030224	monocyte differentiation	7.17755e-05	0.000355788	0.000115206	VEGFA/JUN/MYC	3
	BP	GO:0051973	positive regulation of telomerase activity	7.17755e-05	0.000355788	0.000115206	MAPK1/MAPK3/MYC	3
	BP	GO:1903131	mononuclear cell differentiation	7.17755e-05	0.000355788	0.000115206	VEGFA/JUN/MYC	3
	BP	GO:0051346	negative regulation of hydrolase activity	7.30562e-05	0.000361537	0.000117068	TP53/TNF/VEGFA/PTGS2/AKT1/NOS3/MMP9	7
	BP	GO:0043254	regulation of protein complex assembly	7.40451e-05	0.000365269	0.000118276	TP53/TNF/ESR1/INS/VEGFA/JUN/ICAM1	7
	BP	GO:0010657	muscle cell apoptotic process	7.41761e-05	0.000365269	0.000118276	TP53/EDN1/HMOX1/IGF1	4
	BP	GO:0022600	digestive system process	7.41761e-05	0.000365269	0.000118276	OXTR/OXT/CHRM1/CHRM3	4
	BP	GO:0009156	ribonucleoside monophosphate biosynthetic process	7.70132e-05	0.000378468	0.00012255	TP53/INS/STAT3/HTR2A/IGF1	5
	BP	GO:0002027	regulation of heart rate	7.71095e-05	0.000378468	0.00012255	OXT/EDN1/ADRA1A/EDN2	4
	BP	GO:0034405	response to fluid shear stress	7.79865e-05	0.00037895	0.000122706	PTGS2/AKT1/NOS3	3
	BP	GO:0038083	peptidyl-tyrosine autophosphorylation	7.79865e-05	0.00037895	0.000122706	VEGFA/MAPK3/EGFR	3
	BP	GO:0043029	T cell homeostasis	7.79865e-05	0.00037895	0.000122706	IL2/CASP3/AKT1	3
	BP	GO:0046006	regulation of activated T cell proliferation	7.79865e-05	0.00037895	0.000122706	IL2/CASP3/IGF1	3
	BP	GO:0090050	positive regulation of cell migration involved in sprouting angiogenesis	7.79865e-05	0.00037895	0.000122706	HMOX1/VEGFA/PTGS2	3
	BP	GO:2000142	regulation of DNA-templated transcription, initiation	7.79865e-05	0.00037895	0.000122706	TP53/ESR1/JUN	3
	BP	GO:0009914	hormone transport	7.80936e-05	0.00037895	0.000122706	TNF/HTR2C/EDN1/INS/IL6/EGFR	6
	BP	GO:0031099	regeneration	7.88779e-05	0.000382137	0.000123738	CCND1/HMOX1/JUN/IGF1/EGFR	5
	BP	GO:0000079	regulation of cyclin-dependent protein serine/threonine kinase activity	8.01264e-05	0.000386933	0.000125291	CCND1/CASP3/AKT1/EGFR	4
	BP	GO:0002367	cytokine production involved in immune response	8.01264e-05	0.000386933	0.000125291	TNF/HMOX1/MAPK3/IL6	4
	BP	GO:0016052	carbohydrate catabolic process	8.07773e-05	0.000387576	0.000125499	TP53/INS/STAT3/HTR2A/IGF1	5
	BP	GO:0017038	protein import	8.07773e-05	0.000387576	0.000125499	TP53/MAPK1/STAT3/PTGS2/AKT1	5
	BP	GO:0034341	response to interferon-gamma	8.07773e-05	0.000387576	0.000125499	TP53/EDN1/STAT1/CCL2/ICAM1	5
	BP	GO:0050866	negative regulation of cell activation	8.07773e-05	0.000387576	0.000125499	IL2/CASP3/HMOX1/F2/NOS3	5
	BP	GO:1903706	regulation of hemopoiesis	8.23586e-05	0.000394531	0.000127751	TNF/STAT1/IL2/STAT3/JUN/FOS/MYC	7
	BP	GO:0051188	cofactor biosynthetic process	8.35898e-05	0.000399789	0.000129454	TP53/INS/STAT3/HTR2A/IGF1/PTGS2	6
	BP	GO:0003298	physiological muscle hypertrophy	8.45386e-05	0.000400488	0.00012968	EDN1/ADRA1A/IGF1	3
	BP	GO:0003301	physiological cardiac muscle hypertrophy	8.45386e-05	0.000400488	0.00012968	EDN1/ADRA1A/IGF1	3
	BP	GO:0046326	positive regulation of glucose import	8.45386e-05	0.000400488	0.00012968	INS/IGF1/AKT1	3
	BP	GO:0048009	insulin-like growth factor receptor signaling pathway	8.45386e-05	0.000400488	0.00012968	AR/IGF1/AKT1	3
	BP	GO:0048246	macrophage chemotaxis	8.45386e-05	0.000400488	0.00012968	CCL2/MAPK3/EDN2	3
	BP	GO:0061049	cell growth involved in cardiac muscle cell development	8.45386e-05	0.000400488	0.00012968	EDN1/ADRA1A/IGF1	3
	BP	GO:0050870	positive regulation of T cell activation	8.66876e-05	0.000409374	0.000132557	IL2/CCL2/IGF1/AKT1/IL6	5
	BP	GO:1902806	regulation of cell cycle G1/S phase transition	8.66876e-05	0.000409374	0.000132557	TP53/CCND1/CCL2/AKT1/EGFR	5
	BP	GO:0001655	urogenital system development	8.93908e-05	0.000421474	0.000136476	ESR1/STAT1/VEGFA/MYC/AR/MMP9	6
	BP	GO:0055017	cardiac muscle tissue growth	8.96934e-05	0.000422236	0.000136722	EDN1/ADRA1A/MAPK1/IGF1	4
	BP	GO:0034764	positive regulation of transmembrane transport	9.08093e-05	0.000426149	0.000137989	INS/CCL2/F2/IGF1/AKT1	5
	BP	GO:0045766	positive regulation of angiogenesis	9.08093e-05	0.000426149	0.000137989	HMOX1/VEGFA/STAT3/PTGS2/NOS3	5
	BP	GO:1902042	negative regulation of extrinsic apoptotic signaling pathway via death domain receptors	9.14403e-05	0.000428439	0.000138731	HMOX1/ICAM1/NOS3	3
	BP	GO:0003300	cardiac muscle hypertrophy	9.30594e-05	0.000434664	0.000140747	EDN1/ADRA1A/HTR2B/IGF1	4
	BP	GO:1904029	regulation of cyclin-dependent protein kinase activity	9.30594e-05	0.000434664	0.000140747	CCND1/CASP3/AKT1/EGFR	4
	BP	GO:0043502	regulation of muscle adaptation	9.65163e-05	0.000449409	0.000145521	EDN1/ADRA1A/IGF1/NOS3	4
	BP	GO:0062014	negative regulation of small molecule metabolic process	9.65163e-05	0.000449409	0.000145521	TP53/INS/STAT3/AKT1	4
	BP	GO:0002064	epithelial cell development	9.72729e-05	0.000451527	0.000146207	TNF/ESR1/VEGFA/ICAM1/AR	5
	BP	GO:0070555	response to interleukin-1	9.72729e-05	0.000451527	0.000146207	EDN1/CCL2/ICAM1/MAPK3/IL6	5
	BP	GO:0007596	blood coagulation	9.86906e-05	0.000455327	0.000147437	EDN1/MAPK1/F2/MAPK3/NOS3/IL6	6
	BP	GO:0045823	positive regulation of heart contraction	9.86999e-05	0.000455327	0.000147437	EDN1/ADRA1A/EDN2	3
	BP	GO:0071548	response to dexamethasone	9.86999e-05	0.000455327	0.000147437	EDN1/ICAM1/EGFR	3
	BP	GO:2000008	regulation of protein localization to cell surface	9.86999e-05	0.000455327	0.000147437	EGF/TNF/AKT1	3
	BP	GO:0009124	nucleoside monophosphate biosynthetic process	9.95042e-05	0.000457628	0.000148182	TP53/INS/STAT3/HTR2A/IGF1	5
	BP	GO:1901215	negative regulation of neuron death	9.95042e-05	0.000457628	0.000148182	HMOX1/CCL2/STAT3/JUN/AKT1	5
	BP	GO:2000278	regulation of DNA biosynthetic process	0.000100066	0.000459504	0.00014879	TP53/MAPK1/MAPK3/MYC	4
	BP	GO:0006006	glucose metabolic process	0.000101775	0.000465923	0.000150868	TP53/TNF/INS/IGF1/AKT1	5
	BP	GO:0071229	cellular response to acid chemical	0.000101775	0.000465923	0.000150868	TNF/EDN1/VEGFA/AKT1/EGFR	5
	BP	GO:0014897	striated muscle hypertrophy	0.000103709	0.000474053	0.000153501	EDN1/ADRA1A/HTR2B/IGF1	4
	BP	GO:0050798	activated T cell proliferation	0.000106325	0.000484533	0.000156895	IL2/CASP3/IGF1	3
	BP	GO:0061028	establishment of endothelial barrier	0.000106325	0.000484533	0.000156895	TNF/VEGFA/ICAM1	3
	BP	GO:0007599	hemostasis	0.000107016	0.00048694	0.000157674	EDN1/MAPK1/F2/MAPK3/NOS3/IL6	6
	BP	GO:0033559	unsaturated fatty acid metabolic process	0.000107448	0.000488161	0.000158069	EDN1/MAPK3/PTGS2/EDN2	4
	BP	GO:0050817	coagulation	0.000108746	0.000493313	0.000159738	EDN1/MAPK1/F2/MAPK3/NOS3/IL6	6
	BP	GO:0014896	muscle hypertrophy	0.000111283	0.000504058	0.000163217	EDN1/ADRA1A/HTR2B/IGF1	4
	BP	GO:0016051	carbohydrate biosynthetic process	0.000113732	0.000514371	0.000166556	EGF/INS/HRH1/IGF1/AKT1	5
	BP	GO:0010613	positive regulation of cardiac muscle hypertrophy	0.000114325	0.000515497	0.000166921	EDN1/ADRA1A/IGF1	3
	BP	GO:0010907	positive regulation of glucose metabolic process	0.000114325	0.000515497	0.000166921	INS/IGF1/AKT1	3
	BP	GO:0060419	heart growth	0.000115218	0.000518739	0.00016797	EDN1/ADRA1A/MAPK1/IGF1	4
	BP	GO:0019935	cyclic-nucleotide-mediated signaling	0.000116248	0.000522591	0.000169218	ADRA1B/HTR2C/ADRA1D/ADRA1A/HTR2B	5
	BP	GO:0002699	positive regulation of immune effector process	0.000118806	0.000533291	0.000172683	TNF/IL2/HMOX1/MAPK3/IL6	5
	BP	GO:0046620	regulation of organ growth	0.000119252	0.000533691	0.000172812	EDN1/MAPK1/IGF1/AKT1	4
	BP	GO:0060964	regulation of gene silencing by miRNA	0.000119252	0.000533691	0.000172812	TP53/ESR1/STAT3/EGFR	4
	BP	GO:0006692	prostanoid metabolic process	0.000122708	0.000545675	0.000176692	EDN1/PTGS2/EDN2	3
	BP	GO:0006693	prostaglandin metabolic process	0.000122708	0.000545675	0.000176692	EDN1/PTGS2/EDN2	3
	BP	GO:0014742	positive regulation of muscle hypertrophy	0.000122708	0.000545675	0.000176692	EDN1/ADRA1A/IGF1	3
	BP	GO:0045746	negative regulation of Notch signaling pathway	0.000122708	0.000545675	0.000176692	EGF/AKT1/EGFR	3
	BP	GO:0005976	polysaccharide metabolic process	0.000123387	0.000545675	0.000176692	EGF/INS/IGF1/AKT1	4
	BP	GO:0006690	icosanoid metabolic process	0.000123387	0.000545675	0.000176692	EDN1/MAPK3/PTGS2/EDN2	4
	BP	GO:0030218	erythrocyte differentiation	0.000123387	0.000545675	0.000176692	STAT1/CASP3/VEGFA/STAT3	4
	BP	GO:0042035	regulation of cytokine biosynthetic process	0.000123387	0.000545675	0.000176692	TNF/HMOX1/STAT3/IL6	4
	BP	GO:0007584	response to nutrient	0.000126741	0.000559679	0.000181227	STAT1/CCND1/HMOX1/PTGS2/EGFR	5
	BP	GO:0010463	mesenchymal cell proliferation	0.00013148	0.000577203	0.000186902	STAT1/VEGFA/MYC	3
	BP	GO:0010828	positive regulation of glucose transmembrane transport	0.00013148	0.000577203	0.000186902	INS/IGF1/AKT1	3
	BP	GO:0014002	astrocyte development	0.00013148	0.000577203	0.000186902	TNF/IL6/EGFR	3
	BP	GO:0042987	amyloid precursor protein catabolic process	0.00013148	0.000577203	0.000186902	TNF/CASP3/IGF1	3
	BP	GO:0021782	glial cell development	0.00013197	0.000578502	0.000187322	TNF/AKT1/IL6/EGFR	4
	BP	GO:0002761	regulation of myeloid leukocyte differentiation	0.000136419	0.000594525	0.000192511	TNF/JUN/FOS/MYC	4
	BP	GO:0010906	regulation of glucose metabolic process	0.000136419	0.000594525	0.000192511	TP53/INS/IGF1/AKT1	4
	BP	GO:0060147	regulation of posttranscriptional gene silencing	0.000136419	0.000594525	0.000192511	TP53/ESR1/STAT3/EGFR	4
	BP	GO:0060966	regulation of gene silencing by RNA	0.000136419	0.000594525	0.000192511	TP53/ESR1/STAT3/EGFR	4
	BP	GO:0032570	response to progesterone	0.000140652	0.00061208	0.000198195	OXTR/OXT/FOS	3
	BP	GO:0007173	epidermal growth factor receptor signaling pathway	0.000145643	0.000632882	0.000204931	EGF/AKT1/MMP9/EGFR	4
	BP	GO:0034404	nucleobase-containing small molecule biosynthetic process	0.000146838	0.000637151	0.000206313	TP53/INS/STAT3/HTR2A/IGF1	5
	BP	GO:0005978	glycogen biosynthetic process	0.00015023	0.00064483	0.000208799	INS/IGF1/AKT1	3
	BP	GO:0009250	glucan biosynthetic process	0.00015023	0.00064483	0.000208799	INS/IGF1/AKT1	3
	BP	GO:0014075	response to amine	0.00015023	0.00064483	0.000208799	OXTR/OXT/ICAM1	3
	BP	GO:0022602	ovulation cycle process	0.00015023	0.00064483	0.000208799	ESR1/CASP3/NOS3	3
	BP	GO:0035196	production of miRNAs involved in gene silencing by miRNA	0.00015023	0.00064483	0.000208799	TP53/ESR1/EGFR	3
	BP	GO:0045776	negative regulation of blood pressure	0.00015023	0.00064483	0.000208799	OXT/ADRA1A/NOS3	3
	BP	GO:0002698	negative regulation of immune effector process	0.000150421	0.00064483	0.000208799	TNF/INS/IL2/HMOX1	4
	BP	GO:0022612	gland morphogenesis	0.000150421	0.00064483	0.000208799	TNF/ESR1/AR/EGFR	4
	BP	GO:0045862	positive regulation of proteolysis	0.000150546	0.00064483	0.000208799	EGF/TNF/STAT3/MAPK3/MYC/AKT1	6
	BP	GO:0043618	regulation of transcription from RNA polymerase II promoter in response to stress	0.000155311	0.000664286	0.000215099	TP53/HMOX1/VEGFA/JUN	4
	BP	GO:1904018	positive regulation of vasculature development	0.00015937	0.000680675	0.000220406	HMOX1/VEGFA/STAT3/PTGS2/NOS3	5
	BP	GO:0031952	regulation of protein autophosphorylation	0.000160222	0.000681793	0.000220768	INS/VEGFA/JUN	3
	BP	GO:0050435	amyloid-beta metabolic process	0.000160222	0.000681793	0.000220768	TNF/CASP3/IGF1	3
	BP	GO:1905477	positive regulation of protein localization to membrane	0.000160315	0.000681793	0.000220768	TP53/TNF/AKT1/EGFR	4
	BP	GO:0042089	cytokine biosynthetic process	0.000165434	0.000702568	0.000227495	TNF/HMOX1/STAT3/IL6	4
	BP	GO:0048738	cardiac muscle tissue development	0.000169294	0.000714671	0.000231414	EDN1/ADRA1A/VEGFA/MAPK1/IGF1	5
	BP	GO:0001774	microglial cell activation	0.000170636	0.000714671	0.000231414	TNF/JUN/IL6	3
	BP	GO:0002269	leukocyte activation involved in inflammatory response	0.000170636	0.000714671	0.000231414	TNF/JUN/IL6	3
	BP	GO:0007595	lactation	0.000170636	0.000714671	0.000231414	OXTR/CCND1/VEGFA	3
	BP	GO:0045912	negative regulation of carbohydrate metabolic process	0.000170636	0.000714671	0.000231414	TP53/INS/STAT3	3
	BP	GO:0055023	positive regulation of cardiac muscle tissue growth	0.000170636	0.000714671	0.000231414	EDN1/MAPK1/IGF1	3
	BP	GO:1903727	positive regulation of phospholipid metabolic process	0.000170636	0.000714671	0.000231414	HTR2C/HTR2B/HTR2A	3
	BP	GO:0014013	regulation of gliogenesis	0.000170671	0.000714671	0.000231414	TNF/F2/CHRM1/IL6	4
	BP	GO:0042107	cytokine metabolic process	0.000170671	0.000714671	0.000231414	TNF/HMOX1/STAT3/IL6	4
	BP	GO:0051209	release of sequestered calcium ion into cytosol	0.000170671	0.000714671	0.000231414	HTR2C/HTR2B/F2/HTR2A	4
	BP	GO:0045471	response to ethanol	0.000176027	0.000736068	0.000238343	IL2/CCND1/STAT3/ICAM1	4
	BP	GO:0002686	negative regulation of leukocyte migration	0.00018148	0.000756853	0.000245073	HMOX1/CCL2/AKT1	3
	BP	GO:0051283	negative regulation of sequestering of calcium ion	0.000181503	0.000756853	0.000245073	HTR2C/HTR2B/F2/HTR2A	4
	BP	GO:0032368	regulation of lipid transport	0.000187101	0.000775875	0.000251233	EGF/OXT/EDN1/AKT1	4
	BP	GO:0035270	endocrine system development	0.000187101	0.000775875	0.000251233	MAPK1/MAPK3/AKT1/IL6	4
	BP	GO:0043620	regulation of DNA-templated transcription in response to stress	0.000187101	0.000775875	0.000251233	TP53/HMOX1/VEGFA/JUN	4
	BP	GO:0045727	positive regulation of translation	0.000187101	0.000775875	0.000251233	TNF/MAPK1/MAPK3/IL6	4
	BP	GO:0014009	glial cell proliferation	0.000192763	0.000795197	0.000257489	TNF/CHRM1/IL6	3
	BP	GO:0060425	lung morphogenesis	0.000192763	0.000795197	0.000257489	TNF/MAPK1/MAPK3	3
	BP	GO:1900087	positive regulation of G1/S transition of mitotic cell cycle	0.000192763	0.000795197	0.000257489	CCND1/AKT1/EGFR	3
	BP	GO:0051282	regulation of sequestering of calcium ion	0.000192823	0.000795197	0.000257489	HTR2C/HTR2B/F2/HTR2A	4
	BP	GO:0042593	glucose homeostasis	0.000198077	0.000815739	0.000264141	ADRA1B/INS/STAT3/ICAM1/AKT1	5
	BP	GO:0006631	fatty acid metabolic process	0.000201348	0.000828072	0.000268134	EDN1/INS/MAPK3/PTGS2/AKT1/EDN2	6
	BP	GO:0033500	carbohydrate homeostasis	0.000201922	0.000829293	0.00026853	ADRA1B/INS/STAT3/ICAM1/AKT1	5
	BP	GO:0031050	dsRNA processing	0.00020449	0.000836399	0.000270831	TP53/ESR1/EGFR	3
	BP	GO:0070918	production of small RNA involved in gene silencing by RNA	0.00020449	0.000836399	0.000270831	TP53/ESR1/EGFR	3
	BP	GO:0097366	response to bronchodilator	0.00020449	0.000836399	0.000270831	OXTR/OXT/ICAM1	3
	BP	GO:0042692	muscle cell differentiation	0.000207093	0.000845891	0.000273904	EDN1/ADRA1A/CASP3/VEGFA/IGF1/AKT1	6
	BP	GO:0051208	sequestering of calcium ion	0.000210748	0.000859644	0.000278357	HTR2C/HTR2B/F2/HTR2A	4
	BP	GO:0060421	positive regulation of heart growth	0.000216671	0.000882123	0.000285636	EDN1/MAPK1/IGF1	3
	BP	GO:0055007	cardiac muscle cell differentiation	0.000216981	0.000882123	0.000285636	EDN1/ADRA1A/VEGFA/IGF1	4
	BP	GO:0001660	fever generation	0.000219794	0.000882123	0.000285636	TNF/PTGS2	2
	BP	GO:0032308	positive regulation of prostaglandin secretion	0.000219794	0.000882123	0.000285636	OXT/EDN1	2
	BP	GO:0043084	penile erection	0.000219794	0.000882123	0.000285636	OXTR/OXT	2
	BP	GO:0070472	regulation of uterine smooth muscle contraction	0.000219794	0.000882123	0.000285636	OXTR/OXT	2
	BP	GO:0071104	response to interleukin-9	0.000219794	0.000882123	0.000285636	STAT1/STAT3	2
	BP	GO:0072203	cell proliferation involved in metanephros development	0.000219794	0.000882123	0.000285636	STAT1/MYC	2
	BP	GO:0090037	positive regulation of protein kinase C signaling	0.000219794	0.000882123	0.000285636	ADRA1A/VEGFA	2
	BP	GO:0090336	positive regulation of brown fat cell differentiation	0.000219794	0.000882123	0.000285636	INS/PTGS2	2
	BP	GO:1903799	negative regulation of production of miRNAs involved in gene silencing by miRNA	0.000219794	0.000882123	0.000285636	TP53/ESR1	2
	BP	GO:1903800	positive regulation of production of miRNAs involved in gene silencing by miRNA	0.000219794	0.000882123	0.000285636	TP53/EGFR	2
	BP	GO:0097237	cellular response to toxic substance	0.00022201	0.000888696	0.000287765	TNF/HMOX1/PTGS2/NOS3/IL6	5
	BP	GO:0014706	striated muscle tissue development	0.000222025	0.000888696	0.000287765	EDN1/ADRA1A/VEGFA/MAPK1/FOS/IGF1	6
	BP	GO:0046434	organophosphate catabolic process	0.000226204	0.000904214	0.000292789	TP53/INS/STAT3/HTR2A/IGF1	5
	BP	GO:0030195	negative regulation of blood coagulation	0.000229313	0.000914197	0.000296022	EDN1/F2/NOS3	3
	BP	GO:1905517	macrophage migration	0.000229313	0.000914197	0.000296022	CCL2/MAPK3/EDN2	3
	BP	GO:0019318	hexose metabolic process	0.000230459	0.000917545	0.000297106	TP53/TNF/INS/IGF1/AKT1	5
	BP	GO:0071383	cellular response to steroid hormone stimulus	0.000234774	0.000933484	0.000302267	EDN1/ESR1/ICAM1/AR/EGFR	5
	BP	GO:0001889	liver development	0.000236478	0.000939012	0.000304057	CCND1/HMOX1/JUN/EGFR	4
	BP	GO:0002763	positive regulation of myeloid leukocyte differentiation	0.000242422	0.000956275	0.000309647	TNF/JUN/FOS	3
	BP	GO:0006636	unsaturated fatty acid biosynthetic process	0.000242422	0.000956275	0.000309647	EDN1/PTGS2/EDN2	3
	BP	GO:0050994	regulation of lipid catabolic process	0.000242422	0.000956275	0.000309647	TNF/INS/AKT1	3
	BP	GO:1900047	negative regulation of hemostasis	0.000242422	0.000956275	0.000309647	EDN1/F2/NOS3	3
	BP	GO:1904645	response to amyloid-beta	0.000242422	0.000956275	0.000309647	ICAM1/IGF1/MMP9	3
	BP	GO:0031644	regulation of neurological system process	0.000250157	0.000984194	0.000318687	OXT/HTR2C/EDN1/NOS3	4
	BP	GO:0034605	cellular response to heat	0.000250157	0.000984194	0.000318687	HMOX1/MAPK1/MAPK3/PTGS2	4
	BP	GO:0010876	lipid localization	0.00025444	0.000999727	0.000323717	EGF/OXT/TNF/EDN1/AKT1/IL6	6
	BP	GO:0001541	ovarian follicle development	0.000256008	0.00100064	0.000324012	ESR1/VEGFA/ICAM1	3
	BP	GO:0010823	negative regulation of mitochondrion organization	0.000256008	0.00100064	0.000324012	TP53/IGF1/AKT1	3
	BP	GO:0042220	response to cocaine	0.000256008	0.00100064	0.000324012	OXTR/OXT/HTR2A	3
	BP	GO:0046456	icosanoid biosynthetic process	0.000256008	0.00100064	0.000324012	EDN1/PTGS2/EDN2	3
	BP	GO:0008584	male gonad development	0.000257207	0.0010014	0.000324259	ESR1/CCND1/ICAM1/AR	4
	BP	GO:0046631	alpha-beta T cell activation	0.000257207	0.0010014	0.000324259	INS/IL2/STAT3/IL6	4
	BP	GO:0061008	hepaticobiliary system development	0.000257207	0.0010014	0.000324259	CCND1/HMOX1/JUN/EGFR	4
	BP	GO:0090596	sensory organ morphogenesis	0.000261974	0.00101864	0.00032984	EDN1/VEGFA/MAPK1/STAT3/MAPK3	5
	BP	GO:0007586	digestion	0.000264398	0.00101923	0.000330032	OXTR/OXT/CHRM1/CHRM3	4
	BP	GO:0046546	development of primary male sexual characteristics	0.000264398	0.00101923	0.000330032	ESR1/CCND1/ICAM1/AR	4
	BP	GO:0050715	positive regulation of cytokine secretion	0.000264398	0.00101923	0.000330032	TNF/INS/HTR2B/MAPK3	4
	BP	GO:0006732	coenzyme metabolic process	0.000264858	0.00101923	0.000330032	TP53/INS/STAT3/HTR2A/IGF1/PTGS2	6
	BP	GO:0031652	positive regulation of heat generation	0.000268254	0.00101923	0.000330032	TNF/PTGS2	2
	BP	GO:0032306	regulation of prostaglandin secretion	0.000268254	0.00101923	0.000330032	OXT/EDN1	2
	BP	GO:0033327	Leydig cell differentiation	0.000268254	0.00101923	0.000330032	CCND1/AR	2
	BP	GO:0045899	positive regulation of RNA polymerase II transcriptional preinitiation complex assembly	0.000268254	0.00101923	0.000330032	TP53/ESR1	2
	BP	GO:0051024	positive regulation of immunoglobulin secretion	0.000268254	0.00101923	0.000330032	IL2/IL6	2
	BP	GO:0060439	trachea morphogenesis	0.000268254	0.00101923	0.000330032	MAPK1/MAPK3	2
	BP	GO:0060736	prostate gland growth	0.000268254	0.00101923	0.000330032	ESR1/AR	2
	BP	GO:0061307	cardiac neural crest cell differentiation involved in heart development	0.000268254	0.00101923	0.000330032	MAPK1/MAPK3	2
	BP	GO:0061308	cardiac neural crest cell development involved in heart development	0.000268254	0.00101923	0.000330032	MAPK1/MAPK3	2
	BP	GO:0070106	interleukin-27-mediated signaling pathway	0.000268254	0.00101923	0.000330032	STAT1/STAT3	2
	BP	GO:0070471	uterine smooth muscle contraction	0.000268254	0.00101923	0.000330032	OXTR/OXT	2
	BP	GO:0070757	interleukin-35-mediated signaling pathway	0.000268254	0.00101923	0.000330032	STAT1/STAT3	2
	BP	GO:0072584	caveolin-mediated endocytosis	0.000268254	0.00101923	0.000330032	MAPK1/MAPK3	2
	BP	GO:0072683	T cell extravasation	0.000268254	0.00101923	0.000330032	CCL2/ICAM1	2
	BP	GO:1903078	positive regulation of protein localization to plasma membrane	0.000270076	0.00102485	0.000331853	TNF/AKT1/EGFR	3
	BP	GO:0097553	calcium ion transmembrane import into cytosol	0.000271733	0.00102983	0.000333465	HTR2C/HTR2B/F2/HTR2A	4
	BP	GO:0003007	heart morphogenesis	0.000276442	0.00104636	0.000338816	TP53/HTR2B/VEGFA/JUN/NOS3	5
	BP	GO:0072659	protein localization to plasma membrane	0.000281398	0.00106377	0.000344454	TNF/INS/AR/AKT1/EGFR	5
	BP	GO:0060537	muscle tissue development	0.000282968	0.00106836	0.00034594	EDN1/ADRA1A/VEGFA/MAPK1/FOS/IGF1	6
	BP	GO:0050819	negative regulation of coagulation	0.000284635	0.0010733	0.00034754	EDN1/F2/NOS3	3
	BP	GO:0032722	positive regulation of chemokine production	0.000299692	0.00112441	0.00036409	TNF/HMOX1/IL6	3
	BP	GO:0042093	T-helper cell differentiation	0.000299692	0.00112441	0.00036409	IL2/STAT3/IL6	3
	BP	GO:0071385	cellular response to glucocorticoid stimulus	0.000299692	0.00112441	0.00036409	EDN1/ICAM1/EGFR	3
	BP	GO:1902041	regulation of extrinsic apoptotic signaling pathway via death domain receptors	0.000299692	0.00112441	0.00036409	HMOX1/ICAM1/NOS3	3
	BP	GO:1902107	positive regulation of leukocyte differentiation	0.000302541	0.00113368	0.00036709	TNF/IL2/JUN/FOS	4
	BP	GO:0007612	learning	0.000310618	0.00116249	0.000376421	HRH1/JUN/FOS/PTGS2	4
	BP	GO:0046883	regulation of hormone secretion	0.000312565	0.00116831	0.000378306	TNF/HTR2C/EDN1/INS/EGFR	5
	BP	GO:0001885	endothelial cell development	0.000315254	0.00117106	0.000379194	TNF/VEGFA/ICAM1	3
	BP	GO:0010656	negative regulation of muscle cell apoptotic process	0.000315254	0.00117106	0.000379194	EDN1/HMOX1/IGF1	3
	BP	GO:0032890	regulation of organic acid transport	0.000315254	0.00117106	0.000379194	OXT/EDN1/AKT1	3
	BP	GO:0043388	positive regulation of DNA binding	0.000315254	0.00117106	0.000379194	EGF/IGF1/MMP9	3
	BP	GO:2000351	regulation of endothelial cell apoptotic process	0.000315254	0.00117106	0.000379194	TNF/CCL2/ICAM1	3
	BP	GO:0035264	multicellular organism growth	0.00031885	0.00118295	0.000383044	TP53/STAT3/AR/IGF1	4
	BP	GO:0007320	insemination	0.000321446	0.00118377	0.000383312	OXTR/OXT	2
	BP	GO:0032230	positive regulation of synaptic transmission, GABAergic	0.000321446	0.00118377	0.000383312	OXTR/ADRA1A	2
	BP	GO:0045080	positive regulation of chemokine biosynthetic process	0.000321446	0.00118377	0.000383312	TNF/HMOX1	2
	BP	GO:0046541	saliva secretion	0.000321446	0.00118377	0.000383312	CHRM1/CHRM3	2
	BP	GO:0060453	regulation of gastric acid secretion	0.000321446	0.00118377	0.000383312	OXTR/OXT	2
	BP	GO:0072540	T-helper 17 cell lineage commitment	0.000321446	0.00118377	0.000383312	STAT3/IL6	2
	BP	GO:0002294	CD4-positive, alpha-beta T cell differentiation involved in immune response	0.000331328	0.00121717	0.000394128	IL2/STAT3/IL6	3
	BP	GO:1902808	positive regulation of cell cycle G1/S phase transition	0.000331328	0.00121717	0.000394128	CCND1/AKT1/EGFR	3
	BP	GO:0045165	cell fate commitment	0.000334754	0.00122825	0.000397715	TP53/CASP3/STAT3/AR/IL6	5
	BP	GO:0009267	cellular response to starvation	0.000344484	0.00126241	0.000408774	TP53/MAPK1/JUN/MAPK3	4
	BP	GO:0046651	lymphocyte proliferation	0.000346288	0.00126264	0.00040885	TP53/IL2/CASP3/IGF1/IL6	5
	BP	GO:1902105	regulation of leukocyte differentiation	0.000346288	0.00126264	0.00040885	TNF/IL2/JUN/FOS/MYC	5
	BP	GO:0006417	regulation of translation	0.000347568	0.00126264	0.00040885	TNF/MAPK1/STAT3/MAPK3/AKT1/IL6	6
	BP	GO:0002287	alpha-beta T cell activation involved in immune response	0.000347922	0.00126264	0.00040885	IL2/STAT3/IL6	3
	BP	GO:0002293	alpha-beta T cell differentiation involved in immune response	0.000347922	0.00126264	0.00040885	IL2/STAT3/IL6	3
	BP	GO:0045123	cellular extravasation	0.000347922	0.00126264	0.00040885	TNF/CCL2/ICAM1	3
	BP	GO:0048645	animal organ formation	0.000347922	0.00126264	0.00040885	MAPK1/MAPK3/AR	3
	BP	GO:0071384	cellular response to corticosteroid stimulus	0.000347922	0.00126264	0.00040885	EDN1/ICAM1/EGFR	3
	BP	GO:0008360	regulation of cell shape	0.000353348	0.00127923	0.000414222	VEGFA/CCL2/F2/ICAM1	4
	BP	GO:0050777	negative regulation of immune response	0.000353348	0.00127923	0.000414222	TNF/INS/IL2/HMOX1	4
	BP	GO:0032943	mononuclear cell proliferation	0.00035812	0.00129494	0.00041931	TP53/IL2/CASP3/IGF1/IL6	5
	BP	GO:0002260	lymphocyte homeostasis	0.000365042	0.00131363	0.000425359	IL2/CASP3/AKT1	3
	BP	GO:0046824	positive regulation of nucleocytoplasmic transport	0.000365042	0.00131363	0.000425359	TP53/MAPK1/PTGS2	3
	BP	GO:0050433	regulation of catecholamine secretion	0.000365042	0.00131363	0.000425359	OXTR/OXT/HTR2A	3
	BP	GO:0055025	positive regulation of cardiac muscle tissue development	0.000365042	0.00131363	0.000425359	EDN1/MAPK1/IGF1	3
	BP	GO:0031650	regulation of heat generation	0.000379348	0.00135211	0.000437819	TNF/PTGS2	2
	BP	GO:0033605	positive regulation of catecholamine secretion	0.000379348	0.00135211	0.000437819	OXTR/OXT	2
	BP	GO:0042711	maternal behavior	0.000379348	0.00135211	0.000437819	OXTR/OXT	2
	BP	GO:0043568	positive regulation of insulin-like growth factor receptor signaling pathway	0.000379348	0.00135211	0.000437819	AR/IGF1	2
	BP	GO:0060746	parental behavior	0.000379348	0.00135211	0.000437819	OXTR/OXT	2
	BP	GO:0061029	eyelid development in camera-type eye	0.000379348	0.00135211	0.000437819	JUN/EGFR	2
	BP	GO:1901550	regulation of endothelial cell development	0.000379348	0.00135211	0.000437819	TNF/VEGFA	2
	BP	GO:1903140	regulation of establishment of endothelial barrier	0.000379348	0.00135211	0.000437819	TNF/VEGFA	2
	BP	GO:0045807	positive regulation of endocytosis	0.00038092	0.00135436	0.00043855	EGF/TNF/VEGFA/CCL2	4
	BP	GO:0090316	positive regulation of intracellular protein transport	0.00038092	0.00135436	0.00043855	TP53/MAPK1/CHRM1/PTGS2	4
	BP	GO:0002637	regulation of immunoglobulin production	0.000382696	0.00135436	0.00043855	TNF/IL2/IL6	3
	BP	GO:0034394	protein localization to cell surface	0.000382696	0.00135436	0.00043855	EGF/TNF/AKT1	3
	BP	GO:0042982	amyloid precursor protein metabolic process	0.000382696	0.00135436	0.00043855	TNF/CASP3/IGF1	3
	BP	GO:1904377	positive regulation of protein localization to cell periphery	0.000382696	0.00135436	0.00043855	TNF/AKT1/EGFR	3
	BP	GO:0055067	monovalent inorganic cation homeostasis	0.000390443	0.00138015	0.0004469	OXT/EDN1/MAPK1/MAPK3	4
	BP	GO:0009152	purine ribonucleotide biosynthetic process	0.000395464	0.00139625	0.000452113	TP53/INS/STAT3/HTR2A/IGF1	5
	BP	GO:0060968	regulation of gene silencing	0.000400136	0.00140876	0.000456165	TP53/ESR1/STAT3/EGFR	4
	BP	GO:0050432	catecholamine secretion	0.00040089	0.00140876	0.000456165	OXTR/OXT/HTR2A	3
	BP	GO:1903672	positive regulation of sprouting angiogenesis	0.00040089	0.00140876	0.000456165	HMOX1/VEGFA/PTGS2	3
	BP	GO:2000378	negative regulation of reactive oxygen species metabolic process	0.00040089	0.00140876	0.000456165	TP53/INS/STAT3	3
	BP	GO:0042129	regulation of T cell proliferation	0.00041	0.00143908	0.000465984	IL2/CASP3/IGF1/IL6	4
	BP	GO:0072577	endothelial cell apoptotic process	0.000419632	0.00147117	0.000476373	TNF/CCL2/ICAM1	3
	BP	GO:0015980	energy derivation by oxidation of organic compounds	0.000428776	0.00150147	0.000486184	TP53/INS/MYC/IGF1/AKT1	5
	BP	GO:0002440	production of molecular mediator of immune response	0.000435686	0.00152388	0.000493442	TNF/IL2/HMOX1/MAPK3/IL6	5
	BP	GO:0051926	negative regulation of calcium ion transport	0.000438929	0.00152791	0.000494747	ICAM1/PTGS2/NOS3	3
	BP	GO:1905207	regulation of cardiocyte differentiation	0.000438929	0.00152791	0.000494747	EDN1/IGF1/EGFR	3
	BP	GO:0032310	prostaglandin secretion	0.000441942	0.00152791	0.000494747	OXT/EDN1	2
	BP	GO:0034392	negative regulation of smooth muscle cell apoptotic process	0.000441942	0.00152791	0.000494747	EDN1/IGF1	2
	BP	GO:0035815	positive regulation of renal sodium excretion	0.000441942	0.00152791	0.000494747	OXT/EDN1	2
	BP	GO:0048308	organelle inheritance	0.000441942	0.00152791	0.000494747	MAPK1/MAPK3	2
	BP	GO:0048313	Golgi inheritance	0.000441942	0.00152791	0.000494747	MAPK1/MAPK3	2
	BP	GO:0061051	positive regulation of cell growth involved in cardiac muscle cell development	0.000441942	0.00152791	0.000494747	EDN1/IGF1	2
	BP	GO:1903351	cellular response to dopamine	0.000441942	0.00152791	0.000494747	MAPK1/MAPK3	2
	BP	GO:1905050	positive regulation of metallopeptidase activity	0.000441942	0.00152791	0.000494747	STAT3/MAPK3	2
	BP	GO:0046661	male sex differentiation	0.0004512	0.00155812	0.000504529	ESR1/CCND1/ICAM1/AR	4
	BP	GO:2000573	positive regulation of DNA biosynthetic process	0.000458786	0.0015825	0.000512421	MAPK1/MAPK3/MYC	3
	BP	GO:0005996	monosaccharide metabolic process	0.000478928	0.00164915	0.000534004	TP53/TNF/INS/IGF1/AKT1	5
	BP	GO:0002292	T cell differentiation involved in immune response	0.000479212	0.00164915	0.000534004	IL2/STAT3/IL6	3
	BP	GO:0009260	ribonucleotide biosynthetic process	0.000486439	0.0016721	0.000541435	TP53/INS/STAT3/HTR2A/IGF1	5
	BP	GO:0007088	regulation of mitotic nuclear division	0.000495276	0.00170052	0.000550639	EGF/EDN1/INS/IGF1	4
	BP	GO:0070227	lymphocyte apoptotic process	0.000500213	0.00171354	0.000554855	TP53/IL2/AKT1	3
	BP	GO:2000243	positive regulation of reproductive process	0.000500213	0.00171354	0.000554855	OXTR/OXT/AR	3
	BP	GO:0016236	macroautophagy	0.000501728	0.00171481	0.000555265	TP53/CASP3/HMOX1/MAPK3/AKT1	5
	BP	GO:0050768	negative regulation of neurogenesis	0.000501728	0.00171481	0.000555265	TP53/TNF/STAT3/F2/IL6	5
	BP	GO:0050680	negative regulation of epithelial cell proliferation	0.000506758	0.00171786	0.000556254	TNF/STAT1/CCL2/AR	4
	BP	GO:0030812	negative regulation of nucleotide catabolic process	0.000509206	0.00171786	0.000556254	TP53/STAT3	2
	BP	GO:0045410	positive regulation of interleukin-6 biosynthetic process	0.000509206	0.00171786	0.000556254	TNF/STAT3	2
	BP	GO:0045898	regulation of RNA polymerase II transcriptional preinitiation complex assembly	0.000509206	0.00171786	0.000556254	TP53/ESR1	2
	BP	GO:0051198	negative regulation of coenzyme metabolic process	0.000509206	0.00171786	0.000556254	TP53/STAT3	2
	BP	GO:0051770	positive regulation of nitric-oxide synthase biosynthetic process	0.000509206	0.00171786	0.000556254	STAT1/CCL2	2
	BP	GO:0072075	metanephric mesenchyme development	0.000509206	0.00171786	0.000556254	STAT1/MYC	2
	BP	GO:1900119	positive regulation of execution phase of apoptosis	0.000509206	0.00171786	0.000556254	TP53/IL6	2
	BP	GO:1903350	response to dopamine	0.000509206	0.00171786	0.000556254	MAPK1/MAPK3	2
	BP	GO:1903358	regulation of Golgi organization	0.000509206	0.00171786	0.000556254	MAPK1/MAPK3	2
	BP	GO:2000402	negative regulation of lymphocyte migration	0.000509206	0.00171786	0.000556254	CCL2/AKT1	2
	BP	GO:0001818	negative regulation of cytokine production	0.000509507	0.00171786	0.000556254	TNF/HMOX1/F2/IGF1/IL6	5
	BP	GO:0070661	leukocyte proliferation	0.000525337	0.00176925	0.000572892	TP53/IL2/CASP3/IGF1/IL6	5
	BP	GO:1901568	fatty acid derivative metabolic process	0.000530289	0.00178392	0.000577642	EDN1/MAPK3/PTGS2/EDN2	4
	BP	GO:0046390	ribose phosphate biosynthetic process	0.000541536	0.00181971	0.000589231	TP53/INS/STAT3/HTR2A/IGF1	5
	BP	GO:0033692	cellular polysaccharide biosynthetic process	0.000543965	0.00182378	0.000590548	INS/IGF1/AKT1	3
	BP	GO:0050795	regulation of behavior	0.000543965	0.00182378	0.000590548	INS/HTR2B/STAT3	3
	BP	GO:0038095	Fc-epsilon receptor signaling pathway	0.000554589	0.00185317	0.000600067	MAPK1/JUN/FOS/MAPK3	4
	BP	GO:0050728	negative regulation of inflammatory response	0.000554589	0.00185317	0.000600067	INS/IL2/F2/IGF1	4
	BP	GO:0051100	negative regulation of binding	0.000554589	0.00185317	0.000600067	HMOX1/JUN/MAPK3/AKT1	4
	BP	GO:0043901	negative regulation of multi-organism process	0.000579672	0.00191616	0.000620463	TNF/STAT1/JUN/IGF1	4
	BP	GO:0002295	T-helper cell lineage commitment	0.000581119	0.00191616	0.000620463	STAT3/IL6	2
	BP	GO:0002739	regulation of cytokine secretion involved in immune response	0.000581119	0.00191616	0.000620463	TNF/MAPK3	2
	BP	GO:0007567	parturition	0.000581119	0.00191616	0.000620463	OXTR/EDN1	2
	BP	GO:0014061	regulation of norepinephrine secretion	0.000581119	0.00191616	0.000620463	OXTR/OXT	2
	BP	GO:0032305	positive regulation of icosanoid secretion	0.000581119	0.00191616	0.000620463	OXT/EDN1	2
	BP	GO:0060965	negative regulation of gene silencing by miRNA	0.000581119	0.00191616	0.000620463	TP53/ESR1	2
	BP	GO:0070886	positive regulation of calcineurin-NFAT signaling cascade	0.000581119	0.00191616	0.000620463	TNF/IGF1	2
	BP	GO:0090036	regulation of protein kinase C signaling	0.000581119	0.00191616	0.000620463	ADRA1A/VEGFA	2
	BP	GO:0090335	regulation of brown fat cell differentiation	0.000581119	0.00191616	0.000620463	INS/PTGS2	2
	BP	GO:0106058	positive regulation of calcineurin-mediated signaling	0.000581119	0.00191616	0.000620463	TNF/IGF1	2
	BP	GO:1902004	positive regulation of amyloid-beta formation	0.000581119	0.00191616	0.000620463	TNF/CASP3	2
	BP	GO:0046034	ATP metabolic process	0.00058368	0.00192249	0.000622511	TP53/INS/STAT3/HTR2A/IGF1	5
	BP	GO:0042326	negative regulation of phosphorylation	0.000586185	0.00192861	0.000624495	IL2/CASP3/STAT3/JUN/MYC/AKT1	6
	BP	GO:0031100	animal organ regeneration	0.000590096	0.00193935	0.000627973	CCND1/HMOX1/EGFR	3
	BP	GO:0055002	striated muscle cell development	0.000605552	0.00198796	0.000643713	EDN1/ADRA1A/VEGFA/IGF1	4
	BP	GO:0005977	glycogen metabolic process	0.000614071	0.00201152	0.000651341	INS/IGF1/AKT1	3
	BP	GO:0043367	CD4-positive, alpha-beta T cell differentiation	0.000614071	0.00201152	0.000651341	IL2/STAT3/IL6	3
	BP	GO:2001252	positive regulation of chromosome organization	0.000618795	0.00202478	0.000655635	TP53/VEGFA/MAPK1/MAPK3	4
	BP	GO:1990778	protein localization to cell periphery	0.000637461	0.00208068	0.000673736	TNF/INS/AR/AKT1/EGFR	5
	BP	GO:0006073	cellular glucan metabolic process	0.000638659	0.00208068	0.000673736	INS/IGF1/AKT1	3
	BP	GO:0010611	regulation of cardiac muscle hypertrophy	0.000638659	0.00208068	0.000673736	EDN1/ADRA1A/IGF1	3
	BP	GO:0044042	glucan metabolic process	0.000638659	0.00208068	0.000673736	INS/IGF1/AKT1	3
	BP	GO:0015732	prostaglandin transport	0.000657663	0.00211953	0.000686315	OXT/EDN1	2
	BP	GO:0031649	heat generation	0.000657663	0.00211953	0.000686315	TNF/PTGS2	2
	BP	GO:0032740	positive regulation of interleukin-17 production	0.000657663	0.00211953	0.000686315	IL2/IL6	2
	BP	GO:0043373	CD4-positive, alpha-beta T cell lineage commitment	0.000657663	0.00211953	0.000686315	STAT3/IL6	2
	BP	GO:0048243	norepinephrine secretion	0.000657663	0.00211953	0.000686315	OXTR/OXT	2
	BP	GO:0090185	negative regulation of kidney development	0.000657663	0.00211953	0.000686315	STAT1/MMP9	2
	BP	GO:1904355	positive regulation of telomere capping	0.000657663	0.00211953	0.000686315	MAPK1/MAPK3	2
	BP	GO:1904996	positive regulation of leukocyte adhesion to vascular endothelial cell	0.000657663	0.00211953	0.000686315	TNF/ICAM1	2
	BP	GO:1905331	negative regulation of morphogenesis of an epithelium	0.000657663	0.00211953	0.000686315	TNF/STAT1	2
	BP	GO:2000641	regulation of early endosome to late endosome transport	0.000657663	0.00211953	0.000686315	MAPK1/MAPK3	2
	BP	GO:0001959	regulation of cytokine-mediated signaling pathway	0.00065976	0.002124	0.000687764	TNF/EDN1/STAT1/IL6	4
	BP	GO:0001937	negative regulation of endothelial cell proliferation	0.000663868	0.00213036	0.000689821	TNF/STAT1/CCL2	3
	BP	GO:0061045	negative regulation of wound healing	0.000663868	0.00213036	0.000689821	EDN1/F2/NOS3	3
	BP	GO:0072088	nephron epithelium morphogenesis	0.000663868	0.00213036	0.000689821	STAT1/VEGFA/MYC	3
	BP	GO:0051961	negative regulation of nervous system development	0.00067533	0.00216482	0.000700979	TP53/TNF/STAT3/F2/IL6	5
	BP	GO:0051937	catecholamine transport	0.000689705	0.00220617	0.00071437	OXTR/OXT/HTR2A	3
	BP	GO:1901224	positive regulation of NIK/NF-kappaB signaling	0.000689705	0.00220617	0.00071437	TNF/EDN1/EGFR	3
	BP	GO:0051249	regulation of lymphocyte activation	0.000706701	0.00225813	0.000731193	IL2/CASP3/CCL2/IGF1/AKT1/IL6	6
	BP	GO:0014743	regulation of muscle hypertrophy	0.000716174	0.00227867	0.000737845	EDN1/ADRA1A/IGF1	3
	BP	GO:0055021	regulation of cardiac muscle tissue growth	0.000716174	0.00227867	0.000737845	EDN1/MAPK1/IGF1	3
	BP	GO:0072028	nephron morphogenesis	0.000716174	0.00227867	0.000737845	STAT1/VEGFA/MYC	3
	BP	GO:0072347	response to anesthetic	0.000716174	0.00227867	0.000737845	OXTR/OXT/HTR2A	3
	BP	GO:0022408	negative regulation of cell-cell adhesion	0.000717329	0.00227992	0.000738251	IL2/CASP3/VEGFA/AKT1	4
	BP	GO:0010821	regulation of mitochondrion organization	0.00073226	0.00232491	0.000752818	TP53/IGF1/AKT1/MMP9	4
	BP	GO:0071375	cellular response to peptide hormone stimulus	0.000735271	0.00233199	0.000755112	EDN1/STAT1/INS/STAT3/AKT1	5
	BP	GO:0031065	positive regulation of histone deacetylation	0.000738816	0.00233581	0.000756349	TP53/VEGFA	2
	BP	GO:0150078	positive regulation of neuroinflammatory response	0.000738816	0.00233581	0.000756349	TNF/IL6	2
	BP	GO:2000193	positive regulation of fatty acid transport	0.000738816	0.00233581	0.000756349	OXT/EDN1	2
	BP	GO:0030193	regulation of blood coagulation	0.000743283	0.00234746	0.00076012	EDN1/F2/NOS3	3
	BP	GO:0002040	sprouting angiogenesis	0.00074741	0.00235305	0.000761929	HMOX1/VEGFA/PTGS2/AKT1	4
	BP	GO:0038061	NIK/NF-kappaB signaling	0.00074741	0.00235305	0.000761929	TNF/EDN1/AKT1/EGFR	4
	BP	GO:0043123	positive regulation of I-kappaB kinase/NF-kappaB signaling	0.00074741	0.00235305	0.000761929	TNF/HTR2B/HMOX1/AKT1	4
	BP	GO:1900046	regulation of hemostasis	0.000771038	0.00242488	0.00078519	EDN1/F2/NOS3	3
	BP	GO:0046328	regulation of JNK cascade	0.000778374	0.00244539	0.000791829	TNF/EDN1/AKT1/EGFR	4
	BP	GO:0055001	muscle cell development	0.000794192	0.00249246	0.000807074	EDN1/ADRA1A/VEGFA/IGF1	4
	BP	GO:0032204	regulation of telomere maintenance	0.000799445	0.00250632	0.000811561	MAPK1/MAPK3/MYC	3
	BP	GO:0019058	viral life cycle	0.000810149	0.00253118	0.000819611	TNF/CCL2/HTR2A/ICAM1/EGFR	5
	BP	GO:0048167	regulation of synaptic plasticity	0.000810236	0.00253118	0.000819611	INS/MAPK1/HRH1/PTGS2	4
	BP	GO:0001696	gastric acid secretion	0.000824559	0.00253118	0.000819611	OXTR/OXT	2
	BP	GO:0002363	alpha-beta T cell lineage commitment	0.000824559	0.00253118	0.000819611	STAT3/IL6	2
	BP	GO:0007213	G protein-coupled acetylcholine receptor signaling pathway	0.000824559	0.00253118	0.000819611	CHRM1/CHRM3	2
	BP	GO:0010544	negative regulation of platelet activation	0.000824559	0.00253118	0.000819611	F2/NOS3	2
	BP	GO:0010888	negative regulation of lipid storage	0.000824559	0.00253118	0.000819611	TNF/IL6	2
	BP	GO:0032303	regulation of icosanoid secretion	0.000824559	0.00253118	0.000819611	OXT/EDN1	2
	BP	GO:0060149	negative regulation of posttranscriptional gene silencing	0.000824559	0.00253118	0.000819611	TP53/ESR1	2
	BP	GO:0060252	positive regulation of glial cell proliferation	0.000824559	0.00253118	0.000819611	TNF/IL6	2
	BP	GO:0060438	trachea development	0.000824559	0.00253118	0.000819611	MAPK1/MAPK3	2
	BP	GO:0060457	negative regulation of digestive system process	0.000824559	0.00253118	0.000819611	OXTR/OXT	2
	BP	GO:0060716	labyrinthine layer blood vessel development	0.000824559	0.00253118	0.000819611	MAPK1/AKT1	2
	BP	GO:0060967	negative regulation of gene silencing by RNA	0.000824559	0.00253118	0.000819611	TP53/ESR1	2
	BP	GO:0072074	kidney mesenchyme development	0.000824559	0.00253118	0.000819611	STAT1/MYC	2
	BP	GO:0090201	negative regulation of release of cytochrome c from mitochondria	0.000824559	0.00253118	0.000819611	IGF1/AKT1	2
	BP	GO:1902176	negative regulation of oxidative stress-induced intrinsic apoptotic signaling pathway	0.000824559	0.00253118	0.000819611	INS/AKT1	2
	BP	GO:2000010	positive regulation of protein localization to cell surface	0.000824559	0.00253118	0.000819611	TNF/AKT1	2
	BP	GO:2000696	regulation of epithelial cell differentiation involved in kidney development	0.000824559	0.00253118	0.000819611	STAT1/MMP9	2
	BP	GO:0006367	transcription initiation from RNA polymerase II promoter	0.000826508	0.00253118	0.000819611	TP53/ESR1/CCND1/AR	4
	BP	GO:0043902	positive regulation of multi-organism process	0.000826508	0.00253118	0.000819611	OXTR/OXT/JUN/MAPK3	4
	BP	GO:0051783	regulation of nuclear division	0.000826508	0.00253118	0.000819611	EGF/EDN1/INS/IGF1	4
	BP	GO:0032642	regulation of chemokine production	0.00082851	0.00253118	0.000819611	TNF/HMOX1/IL6	3
	BP	GO:0034644	cellular response to UV	0.00082851	0.00253118	0.000819611	TP53/MYC/PTGS2	3
	BP	GO:0090049	regulation of cell migration involved in sprouting angiogenesis	0.00082851	0.00253118	0.000819611	HMOX1/VEGFA/PTGS2	3
	BP	GO:0071277	cellular response to calcium ion	0.000858239	0.00261933	0.000848155	EDN1/JUN/FOS	3
	BP	GO:0060759	regulation of response to cytokine stimulus	0.000859744	0.00262126	0.000848777	TNF/EDN1/STAT1/IL6	4
	BP	GO:0042594	response to starvation	0.000876711	0.00267027	0.000864648	TP53/MAPK1/JUN/MAPK3	4
	BP	GO:0051251	positive regulation of lymphocyte activation	0.000878754	0.00267377	0.000865782	IL2/CCL2/IGF1/AKT1/IL6	5
	BP	GO:0050818	regulation of coagulation	0.000888638	0.00269836	0.000873744	EDN1/F2/NOS3	3
	BP	GO:0060420	regulation of heart growth	0.000888638	0.00269836	0.000873744	EDN1/MAPK1/IGF1	3
	BP	GO:0009205	purine ribonucleoside triphosphate metabolic process	0.000890598	0.00270157	0.000874783	TP53/INS/STAT3/HTR2A/IGF1	5
	BP	GO:0002374	cytokine secretion involved in immune response	0.000914871	0.00275843	0.000893196	TNF/MAPK3	2
	BP	GO:0007620	copulation	0.000914871	0.00275843	0.000893196	OXTR/OXT	2
	BP	GO:0043369	CD4-positive or CD8-positive, alpha-beta T cell lineage commitment	0.000914871	0.00275843	0.000893196	STAT3/IL6	2
	BP	GO:0045655	regulation of monocyte differentiation	0.000914871	0.00275843	0.000893196	JUN/MYC	2
	BP	GO:0060261	positive regulation of transcription initiation from RNA polymerase II promoter	0.000914871	0.00275843	0.000893196	TP53/ESR1	2
	BP	GO:1902993	positive regulation of amyloid precursor protein catabolic process	0.000914871	0.00275843	0.000893196	TNF/CASP3	2
	BP	GO:0045930	negative regulation of mitotic cell cycle	0.000926845	0.00279172	0.000903975	TP53/TNF/CCND1/CCL2/EGFR	5
	BP	GO:0034637	cellular carbohydrate biosynthetic process	0.000951471	0.00286057	0.00092627	INS/IGF1/AKT1	3
	BP	GO:0009167	purine ribonucleoside monophosphate metabolic process	0.000951614	0.00286057	0.00092627	TP53/INS/STAT3/HTR2A/IGF1	5
	BP	GO:0009126	purine nucleoside monophosphate metabolic process	0.000964182	0.00289244	0.000936588	TP53/INS/STAT3/HTR2A/IGF1	5
	BP	GO:0009199	ribonucleoside triphosphate metabolic process	0.000964182	0.00289244	0.000936588	TP53/INS/STAT3/HTR2A/IGF1	5
	BP	GO:0071897	DNA biosynthetic process	0.000965113	0.00289244	0.000936588	TP53/MAPK1/MAPK3/MYC	4
	BP	GO:0009144	purine nucleoside triphosphate metabolic process	0.000976874	0.00292184	0.000946108	TP53/INS/STAT3/HTR2A/IGF1	5
	BP	GO:0033044	regulation of chromosome organization	0.000976874	0.00292184	0.000946108	TP53/VEGFA/MAPK1/MAPK3/MYC	5
	BP	GO:0010952	positive regulation of peptidase activity	0.000983519	0.00293119	0.000949135	TNF/STAT3/MAPK3/MYC	4
	BP	GO:0001892	embryonic placenta development	0.000983916	0.00293119	0.000949135	MAPK1/AKT1/EGFR	3
	BP	GO:0045844	positive regulation of striated muscle tissue development	0.000983916	0.00293119	0.000949135	EDN1/MAPK1/IGF1	3
	BP	GO:0048636	positive regulation of muscle organ development	0.000983916	0.00293119	0.000949135	EDN1/MAPK1/IGF1	3
	BP	GO:0006913	nucleocytoplasmic transport	0.00098969	0.00294546	0.000953756	TP53/MAPK1/STAT3/PTGS2/AKT1	5
	BP	GO:0015874	norepinephrine transport	0.00100973	0.00298729	0.000967301	OXTR/OXT	2
	BP	GO:0030728	ovulation	0.00100973	0.00298729	0.000967301	PTGS2/NOS3	2
	BP	GO:0035813	regulation of renal sodium excretion	0.00100973	0.00298729	0.000967301	OXT/EDN1	2
	BP	GO:0048245	eosinophil chemotaxis	0.00100973	0.00298729	0.000967301	CCL2/HRH1	2
	BP	GO:0051412	response to corticosterone	0.00100973	0.00298729	0.000967301	CCND1/FOS	2
	BP	GO:0072111	cell proliferation involved in kidney development	0.00100973	0.00298729	0.000967301	STAT1/MYC	2
	BP	GO:1900407	regulation of cellular response to oxidative stress	0.00101705	0.00299711	0.00097048	TNF/INS/AKT1	3
	BP	GO:1901863	positive regulation of muscle tissue development	0.00101705	0.00299711	0.00097048	EDN1/MAPK1/IGF1	3
	BP	GO:1903725	regulation of phospholipid metabolic process	0.00101705	0.00299711	0.00097048	HTR2C/HTR2B/HTR2A	3
	BP	GO:2000177	regulation of neural precursor cell proliferation	0.00101705	0.00299711	0.00097048	EGF/TP53/VEGFA	3
	BP	GO:0051169	nuclear transport	0.00102889	0.00302901	0.00098081	TP53/MAPK1/STAT3/PTGS2/AKT1	5
	BP	GO:0032602	chemokine production	0.00105089	0.00309074	0.0010008	TNF/HMOX1/IL6	3
	BP	GO:0002703	regulation of leukocyte mediated immunity	0.00105962	0.00311336	0.00100812	TNF/IL2/HMOX1/IL6	4
	BP	GO:0015844	monoamine transport	0.00108544	0.00317673	0.00102864	OXTR/OXT/HTR2A	3
	BP	GO:0031058	positive regulation of histone modification	0.00108544	0.00317673	0.00102864	TP53/VEGFA/MAPK3	3
	BP	GO:0045778	positive regulation of ossification	0.00108544	0.00317673	0.00102864	OXT/IGF1/IL6	3
	BP	GO:1903035	negative regulation of response to wounding	0.00108544	0.00317673	0.00102864	EDN1/F2/NOS3	3
	BP	GO:0030878	thyroid gland development	0.00110912	0.00322399	0.00104395	MAPK1/MAPK3	2
	BP	GO:0031281	positive regulation of cyclase activity	0.00110912	0.00322399	0.00104395	MAPK3/NOS3	2
	BP	GO:0035809	regulation of urine volume	0.00110912	0.00322399	0.00104395	OXT/EDN1	2
	BP	GO:0051195	negative regulation of cofactor metabolic process	0.00110912	0.00322399	0.00104395	TP53/STAT3	2
	BP	GO:0090312	positive regulation of protein deacetylation	0.00110912	0.00322399	0.00104395	TP53/VEGFA	2
	BP	GO:1901522	positive regulation of transcription from RNA polymerase II promoter involved in cellular response to chemical stimulus	0.00110912	0.00322399	0.00104395	TP53/VEGFA	2
	BP	GO:1903589	positive regulation of blood vessel endothelial cell proliferation involved in sprouting angiogenesis	0.00110912	0.00322399	0.00104395	HMOX1/VEGFA	2
	BP	GO:0060333	interferon-gamma-mediated signaling pathway	0.00112069	0.00325131	0.00105279	TP53/STAT1/ICAM1	3
	BP	GO:1901992	positive regulation of mitotic cell cycle phase transition	0.00112069	0.00325131	0.00105279	CCND1/AKT1/EGFR	3
	BP	GO:0009161	ribonucleoside monophosphate metabolic process	0.00113909	0.00330149	0.00106904	TP53/INS/STAT3/HTR2A/IGF1	5
	BP	GO:0035710	CD4-positive, alpha-beta T cell activation	0.00115666	0.00334594	0.00108343	IL2/STAT3/IL6	3
	BP	GO:0045833	negative regulation of lipid metabolic process	0.00115666	0.00334594	0.00108343	TNF/INS/AKT1	3
	BP	GO:0033273	response to vitamin	0.00119336	0.00344543	0.00111565	CCND1/PTGS2/EGFR	3
	BP	GO:0072080	nephron tubule development	0.00119336	0.00344543	0.00111565	STAT1/VEGFA/MYC	3
	BP	GO:0050670	regulation of lymphocyte proliferation	0.00120264	0.00346553	0.00112216	IL2/CASP3/IGF1/IL6	4
	BP	GO:0090276	regulation of peptide hormone secretion	0.00120264	0.00346553	0.00112216	TNF/HTR2C/INS/EGFR	4
	BP	GO:0034695	response to prostaglandin E	0.00121302	0.00348541	0.00112859	OXT/AKT1	2
	BP	GO:0035812	renal sodium excretion	0.00121302	0.00348541	0.00112859	OXT/EDN1	2
	BP	GO:0072215	regulation of metanephros development	0.00121302	0.00348541	0.00112859	STAT1/MYC	2
	BP	GO:0032944	regulation of mononuclear cell proliferation	0.00122412	0.0035139	0.00113782	IL2/CASP3/IGF1/IL6	4
	BP	GO:0060993	kidney morphogenesis	0.00123078	0.00352964	0.00114292	STAT1/VEGFA/MYC	3
	BP	GO:0002460	adaptive immune response based on somatic recombination of immune receptors built from immunoglobulin superfamily domains	0.00124252	0.0035599	0.00115271	TNF/IL2/STAT3/ICAM1/IL6	5
	BP	GO:0050707	regulation of cytokine secretion	0.00124586	0.00356608	0.00115471	TNF/INS/HTR2B/MAPK3	4
	BP	GO:0009141	nucleoside triphosphate metabolic process	0.00125784	0.00359692	0.0011647	TP53/INS/STAT3/HTR2A/IGF1	5
	BP	GO:1903531	negative regulation of secretion by cell	0.00126788	0.00360796	0.00116828	TNF/EDN1/INS/HMOX1	4
	BP	GO:0002702	positive regulation of production of molecular mediator of immune response	0.00126893	0.00360796	0.00116828	IL2/MAPK3/IL6	3
	BP	GO:0042102	positive regulation of T cell proliferation	0.00126893	0.00360796	0.00116828	IL2/IGF1/IL6	3
	BP	GO:0044070	regulation of anion transport	0.00126893	0.00360796	0.00116828	OXT/EDN1/AKT1	3
	BP	GO:0051952	regulation of amine transport	0.00126893	0.00360796	0.00116828	OXTR/OXT/HTR2A	3
	BP	GO:0061326	renal tubule development	0.00126893	0.00360796	0.00116828	STAT1/VEGFA/MYC	3
	BP	GO:0019217	regulation of fatty acid metabolic process	0.00130782	0.00371149	0.0012018	INS/PTGS2/AKT1	3
	BP	GO:0032755	positive regulation of interleukin-6 production	0.00130782	0.00371149	0.0012018	TNF/STAT3/IL6	3
	BP	GO:0002092	positive regulation of receptor internalization	0.00132141	0.00373237	0.00120856	EGF/VEGFA	2
	BP	GO:0042104	positive regulation of activated T cell proliferation	0.00132141	0.00373237	0.00120856	IL2/IGF1	2
	BP	GO:0044062	regulation of excretion	0.00132141	0.00373237	0.00120856	OXT/EDN1	2
	BP	GO:0044346	fibroblast apoptotic process	0.00132141	0.00373237	0.00120856	TP53/MYC	2
	BP	GO:1903649	regulation of cytoplasmic transport	0.00132141	0.00373237	0.00120856	MAPK1/MAPK3	2
	BP	GO:0007254	JNK cascade	0.00133557	0.00376881	0.00122036	TNF/EDN1/AKT1/EGFR	4
	BP	GO:0015908	fatty acid transport	0.00134746	0.00379163	0.00122775	OXT/EDN1/AKT1	3
	BP	GO:0120162	positive regulation of cold-induced thermogenesis	0.00134746	0.00379163	0.00122775	OXTR/OXT/VEGFA	3
	BP	GO:1902882	regulation of response to oxidative stress	0.00134746	0.00379163	0.00122775	TNF/INS/AKT1	3
	BP	GO:0032388	positive regulation of intracellular transport	0.00135869	0.00381963	0.00123682	TP53/MAPK1/CHRM1/PTGS2	4
	BP	GO:0006885	regulation of pH	0.00138785	0.00389795	0.00126218	EDN1/MAPK1/MAPK3	3
	BP	GO:0048525	negative regulation of viral process	0.00142899	0.0039872	0.00129108	TNF/STAT1/JUN	3
	BP	GO:1901570	fatty acid derivative biosynthetic process	0.00142899	0.0039872	0.00129108	EDN1/PTGS2/EDN2	3
	BP	GO:0050807	regulation of synapse organization	0.00142971	0.0039872	0.00129108	OXTR/OXT/TNF/INS	4
	BP	GO:0002719	negative regulation of cytokine production involved in immune response	0.00143427	0.0039872	0.00129108	TNF/HMOX1	2
	BP	GO:0009299	mRNA transcription	0.00143427	0.0039872	0.00129108	TP53/STAT3	2
	BP	GO:0019430	removal of superoxide radicals	0.00143427	0.0039872	0.00129108	TNF/NOS3	2
	BP	GO:0045672	positive regulation of osteoclast differentiation	0.00143427	0.0039872	0.00129108	TNF/FOS	2
	BP	GO:0060444	branching involved in mammary gland duct morphogenesis	0.00143427	0.0039872	0.00129108	ESR1/AR	2
	BP	GO:0060571	morphogenesis of an epithelial fold	0.00143427	0.0039872	0.00129108	AR/EGFR	2
	BP	GO:0061050	regulation of cell growth involved in cardiac muscle cell development	0.00143427	0.0039872	0.00129108	EDN1/IGF1	2
	BP	GO:0072677	eosinophil migration	0.00143427	0.0039872	0.00129108	CCL2/HRH1	2
	BP	GO:0009123	nucleoside monophosphate metabolic process	0.00147009	0.00407763	0.00132036	TP53/INS/STAT3/HTR2A/IGF1	5
	BP	GO:0002824	positive regulation of adaptive immune response based on somatic recombination of immune receptors built from immunoglobulin superfamily domains	0.00147089	0.00407763	0.00132036	TNF/IL2/IL6	3
	BP	GO:0055024	regulation of cardiac muscle tissue development	0.00147089	0.00407763	0.00132036	EDN1/MAPK1/IGF1	3
	BP	GO:0046632	alpha-beta T cell differentiation	0.00151356	0.00419203	0.0013574	IL2/STAT3/IL6	3
	BP	GO:0070663	regulation of leukocyte proliferation	0.0015284	0.00422924	0.00136945	IL2/CASP3/IGF1/IL6	4
	BP	GO:0006309	apoptotic DNA fragmentation	0.00155158	0.00426187	0.00138002	CASP3/IL6	2
	BP	GO:0031954	positive regulation of protein autophosphorylation	0.00155158	0.00426187	0.00138002	INS/VEGFA	2
	BP	GO:0032800	receptor biosynthetic process	0.00155158	0.00426187	0.00138002	TNF/EDN1	2
	BP	GO:0043567	regulation of insulin-like growth factor receptor signaling pathway	0.00155158	0.00426187	0.00138002	AR/IGF1	2
	BP	GO:0060740	prostate gland epithelium morphogenesis	0.00155158	0.00426187	0.00138002	ESR1/AR	2
	BP	GO:1903579	negative regulation of ATP metabolic process	0.00155158	0.00426187	0.00138002	TP53/STAT3	2
	BP	GO:1904353	regulation of telomere capping	0.00155158	0.00426187	0.00138002	MAPK1/MAPK3	2
	BP	GO:1905048	regulation of metallopeptidase activity	0.00155158	0.00426187	0.00138002	STAT3/MAPK3	2
	BP	GO:0015837	amine transport	0.00155699	0.00426883	0.00138227	OXTR/OXT/HTR2A	3
	BP	GO:0098869	cellular oxidant detoxification	0.00155699	0.00426883	0.00138227	TNF/PTGS2/NOS3	3
	BP	GO:0002696	positive regulation of leukocyte activation	0.00155839	0.00426883	0.00138227	IL2/CCL2/IGF1/AKT1/IL6	5
	BP	GO:0042176	regulation of protein catabolic process	0.00157651	0.00431452	0.00139706	EGF/TNF/INS/AKT1/EGFR	5
	BP	GO:0044264	cellular polysaccharide metabolic process	0.00160121	0.0043741	0.00141636	INS/IGF1/AKT1	3
	BP	GO:1905269	positive regulation of chromatin organization	0.00160121	0.0043741	0.00141636	TP53/VEGFA/MAPK3	3
	BP	GO:0001649	osteoblast differentiation	0.00160547	0.00437776	0.00141754	TNF/IGF1/AKT1/IL6	4
	BP	GO:0033157	regulation of intracellular protein transport	0.00160547	0.00437776	0.00141754	TP53/MAPK1/CHRM1/PTGS2	4
	BP	GO:0008630	intrinsic apoptotic signaling pathway in response to DNA damage	0.0016462	0.00447659	0.00144954	TP53/TNF/HMOX1	3
	BP	GO:0030593	neutrophil chemotaxis	0.0016462	0.00447659	0.00144954	EDN1/CCL2/EDN2	3
	BP	GO:0046822	regulation of nucleocytoplasmic transport	0.0016462	0.00447659	0.00144954	TP53/MAPK1/PTGS2	3
	BP	GO:0001894	tissue homeostasis	0.00165833	0.00450141	0.00145758	VEGFA/NOS3/IL6/EGFR	4
	BP	GO:0050803	regulation of synapse structure or activity	0.00165833	0.00450141	0.00145758	OXTR/OXT/TNF/INS	4
	BP	GO:0060259	regulation of feeding behavior	0.00167333	0.00452569	0.00146544	INS/STAT3	2
	BP	GO:0071450	cellular response to oxygen radical	0.00167333	0.00452569	0.00146544	TNF/NOS3	2
	BP	GO:0071451	cellular response to superoxide	0.00167333	0.00452569	0.00146544	TNF/NOS3	2
	BP	GO:1902175	regulation of oxidative stress-induced intrinsic apoptotic signaling pathway	0.00167333	0.00452569	0.00146544	INS/AKT1	2
	BP	GO:0002708	positive regulation of lymphocyte mediated immunity	0.00169198	0.00456789	0.00147911	TNF/IL2/IL6	3
	BP	GO:0002821	positive regulation of adaptive immune response	0.00169198	0.00456789	0.00147911	TNF/IL2/IL6	3
	BP	GO:1901989	positive regulation of cell cycle phase transition	0.00173855	0.00468877	0.00151825	CCND1/AKT1/EGFR	3
	BP	GO:0009743	response to carbohydrate	0.00173989	0.00468877	0.00151825	OXT/CASP3/ICAM1/PTGS2	4
	BP	GO:0045408	regulation of interleukin-6 biosynthetic process	0.00179948	0.00481039	0.00155763	TNF/STAT3	2
	BP	GO:0051123	RNA polymerase II preinitiation complex assembly	0.00179948	0.00481039	0.00155763	TP53/ESR1	2
	BP	GO:0060260	regulation of transcription initiation from RNA polymerase II promoter	0.00179948	0.00481039	0.00155763	TP53/ESR1	2
	BP	GO:0060512	prostate gland morphogenesis	0.00179948	0.00481039	0.00155763	ESR1/AR	2
	BP	GO:0095500	acetylcholine receptor signaling pathway	0.00179948	0.00481039	0.00155763	CHRM1/CHRM3	2
	BP	GO:1900543	negative regulation of purine nucleotide metabolic process	0.00179948	0.00481039	0.00155763	TP53/STAT3	2
	BP	GO:1902932	positive regulation of alcohol biosynthetic process	0.00179948	0.00481039	0.00155763	TNF/HRH1	2
	BP	GO:1903831	signal transduction involved in cellular response to ammonium ion	0.00179948	0.00481039	0.00155763	CHRM1/CHRM3	2
	BP	GO:1904994	regulation of leukocyte adhesion to vascular endothelial cell	0.00179948	0.00481039	0.00155763	TNF/ICAM1	2
	BP	GO:0050867	positive regulation of cell activation	0.0018265	0.00487828	0.00157961	IL2/CCL2/IGF1/AKT1/IL6	5
	BP	GO:0006275	regulation of DNA replication	0.00183408	0.00489416	0.00158476	TP53/JUN/EGFR	3
	BP	GO:0048588	developmental cell growth	0.00185291	0.00494	0.0015996	EDN1/ADRA1A/VEGFA/IGF1	4
	BP	GO:0072009	nephron epithelium development	0.00188306	0.0050159	0.00162418	STAT1/VEGFA/MYC	3
	BP	GO:0000303	response to superoxide	0.00193002	0.00510467	0.00165292	TNF/NOS3	2
	BP	GO:0010575	positive regulation of vascular endothelial growth factor production	0.00193002	0.00510467	0.00165292	PTGS2/IL6	2
	BP	GO:0010800	positive regulation of peptidyl-threonine phosphorylation	0.00193002	0.00510467	0.00165292	EGF/MAPK1	2
	BP	GO:0031063	regulation of histone deacetylation	0.00193002	0.00510467	0.00165292	TP53/VEGFA	2
	BP	GO:0042226	interleukin-6 biosynthetic process	0.00193002	0.00510467	0.00165292	TNF/STAT3	2
	BP	GO:0045822	negative regulation of heart contraction	0.00193002	0.00510467	0.00165292	ADRA1A/IL2	2
	BP	GO:0045980	negative regulation of nucleotide metabolic process	0.00193002	0.00510467	0.00165292	TP53/STAT3	2
	BP	GO:2000727	positive regulation of cardiac muscle cell differentiation	0.00193002	0.00510467	0.00165292	EDN1/IGF1	2
	BP	GO:0031623	receptor internalization	0.00198344	0.0052367	0.00169567	EGF/HTR2B/VEGFA	3
	BP	GO:0072676	lymphocyte migration	0.00198344	0.0052367	0.00169567	CCL2/ICAM1/AKT1	3
	BP	GO:0031348	negative regulation of defense response	0.00200125	0.00527907	0.00170939	INS/IL2/F2/IGF1	4
	BP	GO:0030217	T cell differentiation	0.00203188	0.00534418	0.00173048	TP53/IL2/STAT3/IL6	4
	BP	GO:0050663	cytokine secretion	0.00203188	0.00534418	0.00173048	TNF/INS/HTR2B/MAPK3	4
	BP	GO:0042303	molting cycle	0.00203486	0.00534418	0.00173048	TNF/PTGS2/EGFR	3
	BP	GO:0042633	hair cycle	0.00203486	0.00534418	0.00173048	TNF/PTGS2/EGFR	3
	BP	GO:1990748	cellular detoxification	0.00203486	0.00534418	0.00173048	TNF/PTGS2/NOS3	3
	BP	GO:0038093	Fc receptor signaling pathway	0.00206283	0.00539008	0.00174534	MAPK1/JUN/FOS/MAPK3	4
	BP	GO:0000305	response to oxygen radical	0.00206494	0.00539008	0.00174534	TNF/NOS3	2
	BP	GO:0048147	negative regulation of fibroblast proliferation	0.00206494	0.00539008	0.00174534	TP53/MYC	2
	BP	GO:0071549	cellular response to dexamethasone stimulus	0.00206494	0.00539008	0.00174534	ICAM1/EGFR	2
	BP	GO:0090200	positive regulation of release of cytochrome c from mitochondria	0.00206494	0.00539008	0.00174534	TP53/MMP9	2
	BP	GO:1905144	response to acetylcholine	0.00206494	0.00539008	0.00174534	CHRM1/CHRM3	2
	BP	GO:1905145	cellular response to acetylcholine	0.00206494	0.00539008	0.00174534	CHRM1/CHRM3	2
	BP	GO:0045446	endothelial cell differentiation	0.00214018	0.00558161	0.00180736	TNF/VEGFA/ICAM1	3
	BP	GO:0032963	collagen metabolic process	0.00219408	0.00571722	0.00185127	F2/MMP9/IL6	3
	BP	GO:0010543	regulation of platelet activation	0.00220421	0.00571871	0.00185175	F2/NOS3	2
	BP	GO:0019098	reproductive behavior	0.00220421	0.00571871	0.00185175	OXTR/OXT	2
	BP	GO:0045648	positive regulation of erythrocyte differentiation	0.00220421	0.00571871	0.00185175	STAT1/STAT3	2
	BP	GO:0048710	regulation of astrocyte differentiation	0.00220421	0.00571871	0.00185175	F2/IL6	2
	BP	GO:0051482	positive regulation of cytosolic calcium ion concentration involved in phospholipase C-activating G protein-coupled signaling pathway	0.00220421	0.00571871	0.00185175	HTR2C/EDN1	2
	BP	GO:0006661	phosphatidylinositol biosynthetic process	0.00224883	0.00582943	0.0018876	HTR2C/HTR2B/HTR2A	3
	BP	GO:1901222	regulation of NIK/NF-kappaB signaling	0.00230442	0.00596837	0.00193259	TNF/EDN1/EGFR	3
	BP	GO:0071560	cellular response to transforming growth factor beta stimulus	0.0023223	0.00600947	0.0019459	TP53/EDN1/JUN/FOS	4
	BP	GO:0032228	regulation of synaptic transmission, GABAergic	0.00234781	0.00605455	0.0019605	OXTR/ADRA1A	2
	BP	GO:0038128	ERBB2 signaling pathway	0.00234781	0.00605455	0.0019605	EGF/EGFR	2
	BP	GO:0045922	negative regulation of fatty acid metabolic process	0.00234781	0.00605455	0.0019605	INS/AKT1	2
	BP	GO:0060674	placenta blood vessel development	0.00234781	0.00605455	0.0019605	MAPK1/AKT1	2
	BP	GO:0010951	negative regulation of endopeptidase activity	0.00235624	0.00607107	0.00196584	VEGFA/PTGS2/AKT1/MMP9	4
	BP	GO:0042471	ear morphogenesis	0.00236086	0.00607251	0.00196631	EDN1/MAPK1/MAPK3	3
	BP	GO:1990266	neutrophil migration	0.00236086	0.00607251	0.00196631	EDN1/CCL2/EDN2	3
	BP	GO:0003014	renal system process	0.00247629	0.00636397	0.00206069	OXT/EDN1/ADRA1A	3
	BP	GO:0010039	response to iron ion	0.00249572	0.00638649	0.00206798	CCND1/HMOX1	2
	BP	GO:0019934	cGMP-mediated signaling	0.00249572	0.00638649	0.00206798	HTR2C/HTR2B	2
	BP	GO:0036003	positive regulation of transcription from RNA polymerase II promoter in response to stress	0.00249572	0.00638649	0.00206798	TP53/VEGFA	2
	BP	GO:0060603	mammary gland duct morphogenesis	0.00249572	0.00638649	0.00206798	ESR1/AR	2
	BP	GO:1902692	regulation of neuroblast proliferation	0.00249572	0.00638649	0.00206798	TP53/VEGFA	2
	BP	GO:0071559	response to transforming growth factor beta	0.00253111	0.00647152	0.00209551	TP53/EDN1/JUN/FOS	4
	BP	GO:0046718	viral entry into host cell	0.0025353	0.0064767	0.00209719	HTR2A/ICAM1/EGFR	3
	BP	GO:0001933	negative regulation of protein phosphorylation	0.00264403	0.00669023	0.00216633	IL2/CASP3/JUN/MYC/AKT1	5
	BP	GO:0000737	DNA catabolic process, endonucleolytic	0.00264794	0.00669023	0.00216633	CASP3/IL6	2
	BP	GO:0007435	salivary gland morphogenesis	0.00264794	0.00669023	0.00216633	TNF/EGFR	2
	BP	GO:0010574	regulation of vascular endothelial growth factor production	0.00264794	0.00669023	0.00216633	PTGS2/IL6	2
	BP	GO:0032212	positive regulation of telomere maintenance via telomerase	0.00264794	0.00669023	0.00216633	MAPK1/MAPK3	2
	BP	GO:0032660	regulation of interleukin-17 production	0.00264794	0.00669023	0.00216633	IL2/IL6	2
	BP	GO:0032892	positive regulation of organic acid transport	0.00264794	0.00669023	0.00216633	OXT/EDN1	2
	BP	GO:0043368	positive T cell selection	0.00264794	0.00669023	0.00216633	STAT3/IL6	2
	BP	GO:0070884	regulation of calcineurin-NFAT signaling cascade	0.00264794	0.00669023	0.00216633	TNF/IGF1	2
	BP	GO:0071868	cellular response to monoamine stimulus	0.00264794	0.00669023	0.00216633	MAPK1/MAPK3	2
	BP	GO:0071870	cellular response to catecholamine stimulus	0.00264794	0.00669023	0.00216633	MAPK1/MAPK3	2
	BP	GO:0097009	energy homeostasis	0.00264794	0.00669023	0.00216633	STAT3/EDN2	2
	BP	GO:0106056	regulation of calcineurin-mediated signaling	0.00264794	0.00669023	0.00216633	TNF/IGF1	2
	BP	GO:0046717	acid secretion	0.00271754	0.00686029	0.0022214	OXTR/OXT/EDN1	3
	BP	GO:0042391	regulation of membrane potential	0.00277949	0.00700625	0.00226866	EDN1/ADRA1A/JUN/CHRM1/AKT1	5
	BP	GO:2000134	negative regulation of G1/S transition of mitotic cell cycle	0.00278003	0.00700625	0.00226866	TP53/CCND1/CCL2	3
	BP	GO:0010466	negative regulation of peptidase activity	0.00279069	0.00700872	0.00226946	VEGFA/PTGS2/AKT1/MMP9	4
	BP	GO:0015850	organic hydroxy compound transport	0.00279069	0.00700872	0.00226946	EGF/OXTR/OXT/HTR2A	4
	BP	GO:0002701	negative regulation of production of molecular mediator of immune response	0.00280442	0.00700872	0.00226946	TNF/HMOX1	2
	BP	GO:0010259	multicellular organism aging	0.00280442	0.00700872	0.00226946	TP53/EDN1	2
	BP	GO:0030262	apoptotic nuclear changes	0.00280442	0.00700872	0.00226946	CASP3/IL6	2
	BP	GO:0051954	positive regulation of amine transport	0.00280442	0.00700872	0.00226946	OXTR/OXT	2
	BP	GO:0071312	cellular response to alkaloid	0.00280442	0.00700872	0.00226946	CASP3/ICAM1	2
	BP	GO:0098801	regulation of renal system process	0.00280442	0.00700872	0.00226946	OXT/EDN1	2
	BP	GO:0110111	negative regulation of animal organ morphogenesis	0.00280442	0.00700872	0.00226946	TNF/STAT1	2
	BP	GO:1905332	positive regulation of morphogenesis of an epithelium	0.00280442	0.00700872	0.00226946	VEGFA/AR	2
	BP	GO:0018107	peptidyl-threonine phosphorylation	0.00284341	0.00709431	0.00229718	EGF/MAPK1/AKT1	3
	BP	GO:0045667	regulation of osteoblast differentiation	0.00284341	0.00709431	0.00229718	TNF/IGF1/IL6	3
	BP	GO:0140014	mitotic nuclear division	0.00286809	0.00714992	0.00231518	EGF/EDN1/INS/IGF1	4
	BP	GO:0010573	vascular endothelial growth factor production	0.00296517	0.00733695	0.00237574	PTGS2/IL6	2
	BP	GO:0034390	smooth muscle cell apoptotic process	0.00296517	0.00733695	0.00237574	EDN1/IGF1	2
	BP	GO:0034391	regulation of smooth muscle cell apoptotic process	0.00296517	0.00733695	0.00237574	EDN1/IGF1	2
	BP	GO:0042554	superoxide anion generation	0.00296517	0.00733695	0.00237574	EDN1/EGFR	2
	BP	GO:0045740	positive regulation of DNA replication	0.00296517	0.00733695	0.00237574	JUN/EGFR	2
	BP	GO:0071392	cellular response to estradiol stimulus	0.00296517	0.00733695	0.00237574	ESR1/EGFR	2
	BP	GO:0090322	regulation of superoxide metabolic process	0.00296517	0.00733695	0.00237574	TNF/EGFR	2
	BP	GO:1901099	negative regulation of signal transduction in absence of ligand	0.00296517	0.00733695	0.00237574	TNF/AKT1	2
	BP	GO:2001240	negative regulation of extrinsic apoptotic signaling pathway in absence of ligand	0.00296517	0.00733695	0.00237574	TNF/AKT1	2
	BP	GO:0002576	platelet degranulation	0.00297283	0.00734378	0.00237796	EGF/VEGFA/IGF1	3
	BP	GO:0034763	negative regulation of transmembrane transport	0.00297283	0.00734378	0.00237796	TNF/AKT1/MMP9	3
	BP	GO:0071482	cellular response to light stimulus	0.00303889	0.00749458	0.00242679	TP53/MYC/PTGS2	3
	BP	GO:1903038	negative regulation of leukocyte cell-cell adhesion	0.00303889	0.00749458	0.00242679	IL2/CASP3/AKT1	3
	BP	GO:1901990	regulation of mitotic cell cycle phase transition	0.00306549	0.00755396	0.00244601	TP53/CCND1/CCL2/AKT1/EGFR	5
	BP	GO:0006836	neurotransmitter transport	0.00306802	0.00755398	0.00244602	HTR2C/EDN1/ADRA1A/HTR2A	4
	BP	GO:0050671	positive regulation of lymphocyte proliferation	0.00310584	0.00763165	0.00247117	IL2/IGF1/IL6	3
	BP	GO:0002714	positive regulation of B cell mediated immunity	0.00313015	0.00763165	0.00247117	TNF/IL2	2
	BP	GO:0002891	positive regulation of immunoglobulin mediated immune response	0.00313015	0.00763165	0.00247117	TNF/IL2	2
	BP	GO:0006921	cellular component disassembly involved in execution phase of apoptosis	0.00313015	0.00763165	0.00247117	CASP3/IL6	2
	BP	GO:0007431	salivary gland development	0.00313015	0.00763165	0.00247117	TNF/EGFR	2
	BP	GO:0030212	hyaluronan metabolic process	0.00313015	0.00763165	0.00247117	EGF/AKT1	2
	BP	GO:0032941	secretion by tissue	0.00313015	0.00763165	0.00247117	CHRM1/CHRM3	2
	BP	GO:0042307	positive regulation of protein import into nucleus	0.00313015	0.00763165	0.00247117	MAPK1/PTGS2	2
	BP	GO:0043114	regulation of vascular permeability	0.00313015	0.00763165	0.00247117	VEGFA/HRH1	2
	BP	GO:1903427	negative regulation of reactive oxygen species biosynthetic process	0.00313015	0.00763165	0.00247117	INS/STAT3	2
	BP	GO:1904358	positive regulation of telomere maintenance via telomere lengthening	0.00313015	0.00763165	0.00247117	MAPK1/MAPK3	2
	BP	GO:2000273	positive regulation of signaling receptor activity	0.00313015	0.00763165	0.00247117	EGF/CCL2	2
	BP	GO:0032946	positive regulation of mononuclear cell proliferation	0.00317369	0.00771269	0.00249741	IL2/IGF1/IL6	3
	BP	GO:0046887	positive regulation of hormone secretion	0.00317369	0.00771269	0.00249741	EDN1/INS/EGFR	3
	BP	GO:0098754	detoxification	0.00317369	0.00771269	0.00249741	TNF/PTGS2/NOS3	3
	BP	GO:1902807	negative regulation of cell cycle G1/S phase transition	0.00317369	0.00771269	0.00249741	TP53/CCND1/CCL2	3
	BP	GO:0032868	response to insulin	0.00319245	0.00775199	0.00251014	STAT1/INS/ICAM1/AKT1	4
	BP	GO:0003158	endothelium development	0.00324245	0.00786702	0.00254738	TNF/VEGFA/ICAM1	3
	BP	GO:0032094	response to food	0.00329935	0.0079535	0.00257539	OXT/AKT1	2
	BP	GO:0032620	interleukin-17 production	0.00329935	0.0079535	0.00257539	IL2/IL6	2
	BP	GO:0045022	early endosome to late endosome transport	0.00329935	0.0079535	0.00257539	MAPK1/MAPK3	2
	BP	GO:0060416	response to growth hormone	0.00329935	0.0079535	0.00257539	STAT3/AKT1	2
	BP	GO:0071867	response to monoamine	0.00329935	0.0079535	0.00257539	MAPK1/MAPK3	2
	BP	GO:0071869	response to catecholamine	0.00329935	0.0079535	0.00257539	MAPK1/MAPK3	2
	BP	GO:1903523	negative regulation of blood circulation	0.00329935	0.0079535	0.00257539	ADRA1A/IL2	2
	BP	GO:1904037	positive regulation of epithelial cell apoptotic process	0.00329935	0.0079535	0.00257539	CCL2/IL6	2
	BP	GO:0002705	positive regulation of leukocyte mediated immunity	0.00331212	0.00797787	0.00258328	TNF/IL2/IL6	3
	BP	GO:0018210	peptidyl-threonine modification	0.00338271	0.00810875	0.00262566	EGF/MAPK1/AKT1	3
	BP	GO:0030260	entry into host cell	0.00338271	0.00810875	0.00262566	HTR2A/ICAM1/EGFR	3
	BP	GO:0044409	entry into host	0.00338271	0.00810875	0.00262566	HTR2A/ICAM1/EGFR	3
	BP	GO:0048565	digestive tract development	0.00338271	0.00810875	0.00262566	OXTR/TNF/EGFR	3
	BP	GO:0051806	entry into cell of other organism involved in symbiotic interaction	0.00338271	0.00810875	0.00262566	HTR2A/ICAM1/EGFR	3
	BP	GO:0051828	entry into other organism involved in symbiotic interaction	0.00338271	0.00810875	0.00262566	HTR2A/ICAM1/EGFR	3
	BP	GO:0001822	kidney development	0.00345161	0.0082673	0.002677	STAT1/VEGFA/MYC/MMP9	4
	BP	GO:0033146	regulation of intracellular estrogen receptor signaling pathway	0.00347275	0.00828479	0.00268266	ESR1/AR	2
	BP	GO:0033574	response to testosterone	0.00347275	0.00828479	0.00268266	EDN1/AR	2
	BP	GO:0051930	regulation of sensory perception of pain	0.00347275	0.00828479	0.00268266	OXT/EDN1	2
	BP	GO:0060969	negative regulation of gene silencing	0.00347275	0.00828479	0.00268266	TP53/ESR1	2
	BP	GO:1904591	positive regulation of protein import	0.00347275	0.00828479	0.00268266	MAPK1/PTGS2	2
	BP	GO:0007292	female gamete generation	0.00352664	0.00840666	0.00272212	IGF1/PTGS2/NOS3	3
	BP	GO:0030100	regulation of endocytosis	0.00358642	0.00854237	0.00276607	EGF/TNF/VEGFA/CCL2	4
	BP	GO:1903670	regulation of sprouting angiogenesis	0.0036	0.00856788	0.00277433	HMOX1/VEGFA/PTGS2	3
	BP	GO:0007618	mating	0.00365033	0.00864643	0.00279976	OXTR/OXT	2
	BP	GO:0044058	regulation of digestive system process	0.00365033	0.00864643	0.00279976	OXTR/OXT	2
	BP	GO:0045124	regulation of bone resorption	0.00365033	0.00864643	0.00279976	IL6/EGFR	2
	BP	GO:0051931	regulation of sensory perception	0.00365033	0.00864643	0.00279976	OXT/EDN1	2
	BP	GO:0071470	cellular response to osmotic stress	0.00365033	0.00864643	0.00279976	CASP3/PTGS2	2
	BP	GO:0090184	positive regulation of kidney development	0.00365033	0.00864643	0.00279976	VEGFA/MYC	2
	BP	GO:0016579	protein deubiquitination	0.00367827	0.00870572	0.00281896	TP53/ESR1/MYC/AR	4
	BP	GO:0031647	regulation of protein stability	0.00372479	0.00880886	0.00285236	TP53/CASP3/MAPK1/IGF1	4
	BP	GO:0007189	adenylate cyclase-activating G protein-coupled receptor signaling pathway	0.0037495	0.00884633	0.00286449	ADRA1B/ADRA1D/ADRA1A	3
	BP	GO:0051588	regulation of neurotransmitter transport	0.0037495	0.00884633	0.00286449	HTR2C/ADRA1A/HTR2A	3
	BP	GO:0070665	positive regulation of leukocyte proliferation	0.0037495	0.00884633	0.00286449	IL2/IGF1/IL6	3
	BP	GO:0034976	response to endoplasmic reticulum stress	0.00377171	0.00889173	0.00287919	TP53/CCND1/CCL2/JUN	4
	BP	GO:0072073	kidney epithelium development	0.00382565	0.00897047	0.00290469	STAT1/VEGFA/MYC	3
	BP	GO:0006308	DNA catabolic process	0.00383207	0.00897047	0.00290469	CASP3/IL6	2
	BP	GO:0040019	positive regulation of embryonic development	0.00383207	0.00897047	0.00290469	AR/IGF1	2
	BP	GO:0043267	negative regulation of potassium ion transport	0.00383207	0.00897047	0.00290469	HTR2A/NOS3	2
	BP	GO:0050873	brown fat cell differentiation	0.00383207	0.00897047	0.00290469	INS/PTGS2	2
	BP	GO:0090279	regulation of calcium ion import	0.00383207	0.00897047	0.00290469	EGF/CCL2	2
	BP	GO:0098927	vesicle-mediated transport between endosomal compartments	0.00383207	0.00897047	0.00290469	MAPK1/MAPK3	2
	BP	GO:1900117	regulation of execution phase of apoptosis	0.00383207	0.00897047	0.00290469	TP53/IL6	2
	BP	GO:1905209	positive regulation of cardiocyte differentiation	0.00383207	0.00897047	0.00290469	EDN1/IGF1	2
	BP	GO:0007162	negative regulation of cell adhesion	0.00396341	0.00927066	0.00300189	IL2/CASP3/VEGFA/AKT1	4
	BP	GO:0072006	nephron development	0.00398079	0.00930405	0.0030127	STAT1/VEGFA/MYC	3
	BP	GO:0002639	positive regulation of immunoglobulin production	0.00401796	0.00937629	0.00303609	IL2/IL6	2
	BP	GO:0010677	negative regulation of cellular carbohydrate metabolic process	0.00401796	0.00937629	0.00303609	INS/STAT3	2
	BP	GO:0031056	regulation of histone modification	0.00405978	0.00944443	0.00305816	TP53/VEGFA/MAPK3	3
	BP	GO:0044344	cellular response to fibroblast growth factor stimulus	0.00405978	0.00944443	0.00305816	MAPK1/CCL2/MAPK3	3
	BP	GO:0106106	cold-induced thermogenesis	0.00405978	0.00944443	0.00305816	OXTR/OXT/VEGFA	3
	BP	GO:0120161	regulation of cold-induced thermogenesis	0.00405978	0.00944443	0.00305816	OXTR/OXT/VEGFA	3
	BP	GO:0072001	renal system development	0.00416163	0.00967386	0.00313245	STAT1/VEGFA/MYC/MMP9	4
	BP	GO:0008631	intrinsic apoptotic signaling pathway in response to oxidative stress	0.00420797	0.0097212	0.00314778	INS/AKT1	2
	BP	GO:0031279	regulation of cyclase activity	0.00420797	0.0097212	0.00314778	MAPK3/NOS3	2
	BP	GO:0032459	regulation of protein oligomerization	0.00420797	0.0097212	0.00314778	TP53/INS	2
	BP	GO:0033173	calcineurin-NFAT signaling cascade	0.00420797	0.0097212	0.00314778	TNF/IGF1	2
	BP	GO:0034198	cellular response to amino acid starvation	0.00420797	0.0097212	0.00314778	MAPK1/MAPK3	2
	BP	GO:0050850	positive regulation of calcium-mediated signaling	0.00420797	0.0097212	0.00314778	TNF/IGF1	2
	BP	GO:0071364	cellular response to epidermal growth factor stimulus	0.00420797	0.0097212	0.00314778	AKT1/EGFR	2
	BP	GO:1904646	cellular response to amyloid-beta	0.00420797	0.0097212	0.00314778	ICAM1/IGF1	2
	BP	GO:0002822	regulation of adaptive immune response based on somatic recombination of immune receptors built from immunoglobulin superfamily domains	0.00422062	0.00974289	0.0031548	TNF/IL2/IL6	3
	BP	GO:1901987	regulation of cell cycle phase transition	0.0042733	0.0098569	0.00319172	TP53/CCND1/CCL2/AKT1/EGFR	5
	BP	GO:0055123	digestive system development	0.00430247	0.00991656	0.00321104	OXTR/TNF/EGFR	3
	CC	GO:0045121	membrane raft	1.61623e-12	1.17435e-10	7.06373e-11	ADRA1B/TNF/ADRA1A/CASP3/HMOX1/MAPK1/HTR2A/ICAM1/MAPK3/PTGS2/NOS3/EGFR	12
	CC	GO:0098857	membrane microdomain	1.67764e-12	1.17435e-10	7.06373e-11	ADRA1B/TNF/ADRA1A/CASP3/HMOX1/MAPK1/HTR2A/ICAM1/MAPK3/PTGS2/NOS3/EGFR	12
	CC	GO:0098589	membrane region	2.59969e-12	1.21319e-10	7.29737e-11	ADRA1B/TNF/ADRA1A/CASP3/HMOX1/MAPK1/HTR2A/ICAM1/MAPK3/PTGS2/NOS3/EGFR	12
	CC	GO:0005901	caveola	5.41483e-12	1.89519e-10	1.13996e-10	ADRA1B/ADRA1A/HMOX1/MAPK1/HTR2A/MAPK3/PTGS2/NOS3	8
	CC	GO:0044853	plasma membrane raft	6.78705e-11	1.90038e-09	1.14308e-09	ADRA1B/ADRA1A/HMOX1/MAPK1/HTR2A/MAPK3/PTGS2/NOS3	8
	CC	GO:0000790	nuclear chromatin	1.33934e-05	0.000312512	0.000187977	TP53/ESR1/STAT1/STAT3/JUN/MYC/AR	7
	CC	GO:0099056	integral component of presynaptic membrane	1.73986e-05	0.000347973	0.000209307	ADRA1A/HTR2A/CHRM1/CHRM3	4
	CC	GO:0098889	intrinsic component of presynaptic membrane	2.75739e-05	0.000482542	0.000290251	ADRA1A/HTR2A/CHRM1/CHRM3	4
	CC	GO:0031983	vesicle lumen	7.69153e-05	0.00119646	0.000719675	EGF/INS/VEGFA/MAPK1/IGF1/EGFR	6
	CC	GO:0099055	integral component of postsynaptic membrane	0.000110744	0.00155042	0.000932585	ADRA1A/HTR2A/CHRM1/CHRM3	4
	CC	GO:0098936	intrinsic component of postsynaptic membrane	0.000130199	0.00165707	0.000996736	ADRA1A/HTR2A/CHRM1/CHRM3	4
	CC	GO:0099699	integral component of synaptic membrane	0.000302544	0.00352968	0.00212311	ADRA1A/HTR2A/CHRM1/CHRM3	4
	CC	GO:0042734	presynaptic membrane	0.000376427	0.0035323	0.00212469	ADRA1A/HTR2A/CHRM1/CHRM3	4
	CC	GO:0031093	platelet alpha granule lumen	0.000391584	0.0035323	0.00212469	EGF/VEGFA/IGF1	3
	CC	GO:0090575	RNA polymerase II transcription factor complex	0.000394451	0.0035323	0.00212469	TP53/STAT3/JUN/FOS	4
	CC	GO:0099240	intrinsic component of synaptic membrane	0.000403692	0.0035323	0.00212469	ADRA1A/HTR2A/CHRM1/CHRM3	4
	CC	GO:0005788	endoplasmic reticulum lumen	0.000484036	0.00398618	0.0023977	EDN1/INS/F2/PTGS2/IL6	5
	CC	GO:0034774	secretory granule lumen	0.000575432	0.00434988	0.00261647	EGF/INS/VEGFA/MAPK1/IGF1	5
	CC	GO:0031143	pseudopodium	0.000590341	0.00434988	0.00261647	MAPK1/MAPK3	2
	CC	GO:0060205	cytoplasmic vesicle lumen	0.00072644	0.00508508	0.0030587	EGF/INS/VEGFA/MAPK1/IGF1	5
	CC	GO:0098978	glutamatergic synapse	0.000838854	0.00551364	0.00331647	ADRA1A/STAT3/HTR2A/CHRM1/CHRM3	5
	CC	GO:0044798	nuclear transcription factor complex	0.000866428	0.00551364	0.00331647	TP53/STAT3/JUN/FOS	4
	CC	GO:0031091	platelet alpha granule	0.000958431	0.00583393	0.00350913	EGF/VEGFA/IGF1	3
	MF	GO:0008227	G protein-coupled amine receptor activity	1.10013e-14	2.24426e-12	1.08855e-12	ADRA1B/HTR2C/ADRA1D/ADRA1A/HTR2B/HRH1/HTR2A/CHRM1/CHRM3	9
	MF	GO:0004993	G protein-coupled serotonin receptor activity	1.57606e-10	1.07172e-08	5.19823e-09	HTR2C/HTR2B/HRH1/HTR2A/CHRM1/CHRM3	6
	MF	GO:0099589	serotonin receptor activity	1.57606e-10	1.07172e-08	5.19823e-09	HTR2C/HTR2B/HRH1/HTR2A/CHRM1/CHRM3	6
	MF	GO:0099528	G protein-coupled neurotransmitter receptor activity	5.20517e-10	2.65464e-08	1.2876e-08	HTR2C/HTR2B/HRH1/HTR2A/CHRM1/CHRM3	6
	MF	GO:0048018	receptor ligand activity	7.65598e-10	3.12364e-08	1.51508e-08	EGF/OXT/TNF/EDN1/INS/IL2/VEGFA/CCL2/F2/IGF1/EDN2/IL6	12
	MF	GO:0019902	phosphatase binding	2.4118e-07	8.08443e-06	3.92124e-06	TP53/STAT1/MAPK1/STAT3/MAPK3/AKT1/EGFR	7
	MF	GO:0005126	cytokine receptor binding	3.09198e-07	8.08443e-06	3.92124e-06	TNF/STAT1/IL2/CASP3/VEGFA/CCL2/STAT3/IL6	8
	MF	GO:0030594	neurotransmitter receptor activity	3.17037e-07	8.08443e-06	3.92124e-06	HTR2C/HTR2B/HRH1/HTR2A/CHRM1/CHRM3	6
	MF	GO:0043176	amine binding	1.47442e-06	3.00781e-05	1.4589e-05	HTR2C/HTR2B/HTR2A	3
	MF	GO:0051378	serotonin binding	1.47442e-06	3.00781e-05	1.4589e-05	HTR2C/HTR2B/HTR2A	3
	MF	GO:0001085	RNA polymerase II transcription factor binding	1.65641e-06	3.07188e-05	1.48997e-05	TP53/ESR1/STAT3/JUN/FOS/AR	6
	MF	GO:0008083	growth factor activity	2.21992e-06	3.77387e-05	1.83046e-05	EGF/IL2/VEGFA/F2/IGF1/IL6	6
	MF	GO:0001664	G protein-coupled receptor binding	3.86787e-06	6.06957e-05	2.94396e-05	OXT/EDN1/STAT1/IL2/CCL2/STAT3/EDN2	7
	MF	GO:0001228	DNA-binding transcription activator activity, RNA polymerase II-specific	7.5736e-06	0.000102718	4.9822e-05	TP53/ESR1/STAT1/STAT3/JUN/FOS/MYC/AR	8
	MF	GO:0004935	adrenergic receptor activity	8.25889e-06	0.000102718	4.9822e-05	ADRA1B/ADRA1D/ADRA1A	3
	MF	GO:0001047	core promoter binding	8.55984e-06	0.000102718	4.9822e-05	TP53/STAT1/FOS/MYC	4
	MF	GO:0042165	neurotransmitter binding	8.55984e-06	0.000102718	4.9822e-05	HTR2C/HTR2B/HTR2A/CHRM3	4
	MF	GO:0005179	hormone activity	9.94587e-06	0.00011272	5.46732e-05	OXT/EDN1/INS/IGF1/EDN2	5
	MF	GO:0005125	cytokine activity	1.24452e-05	0.000133622	6.48117e-05	TNF/EDN1/IL2/VEGFA/CCL2/IL6	6
	MF	GO:0001091	RNA polymerase II basal transcription factor binding	1.37773e-05	0.000140528	6.81614e-05	TP53/ESR1/AR	3
	MF	GO:0019903	protein phosphatase binding	1.93882e-05	0.000188343	9.13531e-05	TP53/STAT1/STAT3/AKT1/EGFR	5
	MF	GO:0070405	ammonium ion binding	2.94758e-05	0.000273321	0.00013257	HTR2C/HTR2B/HTR2A/CHRM3	4
	MF	GO:0004435	phosphatidylinositol phospholipase C activity	3.11119e-05	0.000275949	0.000133845	EDNRA/CHRM1/CHRM3	3
	MF	GO:0004629	phospholipase C activity	3.90717e-05	0.00033211	0.000161085	EDNRA/CHRM1/CHRM3	3
	MF	GO:0051721	protein phosphatase 2A binding	5.87667e-05	0.000479536	0.000232592	TP53/STAT1/AKT1	3
	MF	GO:0008081	phosphoric diester hydrolase activity	7.15808e-05	0.000561634	0.000272413	EDNRA/HMOX1/CHRM1/CHRM3	4
	MF	GO:0004620	phospholipase activity	9.83905e-05	0.000716845	0.000347696	EDNRA/HMOX1/CHRM1/CHRM3	4
	MF	GO:0042562	hormone binding	9.83905e-05	0.000716845	0.000347696	OXTR/AR/CHRM3/EGFR	4
	MF	GO:0004712	protein serine/threonine/tyrosine kinase activity	0.000143587	0.000976389	0.000473584	MAPK1/MAPK3/AKT1	3
	MF	GO:0048020	CCR chemokine receptor binding	0.000143587	0.000976389	0.000473584	STAT1/CCL2/STAT3	3
	MF	GO:0001046	core promoter sequence-specific DNA binding	0.000164556	0.00108288	0.000525237	TP53/STAT1/FOS	3
	MF	GO:0032813	tumor necrosis factor receptor superfamily binding	0.000175746	0.00112038	0.000543426	TNF/STAT1/CASP3	3
	MF	GO:0004879	nuclear receptor activity	0.000187419	0.00112452	0.000545431	ESR1/STAT3/AR	3
	MF	GO:0098531	transcription factor activity, direct ligand regulated sequence-specific DNA binding	0.000187419	0.00112452	0.000545431	ESR1/STAT3/AR	3
	MF	GO:0016298	lipase activity	0.000229238	0.00133613	0.000648071	EDNRA/HMOX1/CHRM1/CHRM3	4
	MF	GO:0002020	protease binding	0.000236227	0.00133862	0.00064928	TP53/TNF/INS/CASP3	4
	MF	GO:0070851	growth factor receptor binding	0.000281431	0.00155167	0.000752618	EGF/IL2/VEGFA/IL6	4
	MF	GO:0004707	MAP kinase activity	0.000491413	0.00263811	0.00127958	MAPK1/MAPK3	2
	MF	GO:0042379	chemokine receptor binding	0.000512602	0.0026813	0.00130053	STAT1/CCL2/STAT3	3
	MF	GO:0070491	repressing transcription factor binding	0.000634996	0.00306702	0.00148762	STAT1/STAT3/MYC	3
	MF	GO:0004708	MAP kinase kinase activity	0.000646069	0.00306702	0.00148762	MAPK1/MAPK3	2
	MF	GO:0005159	insulin-like growth factor receptor binding	0.000646069	0.00306702	0.00148762	INS/IGF1	2
	MF	GO:0001098	basal transcription machinery binding	0.000661514	0.00306702	0.00148762	TP53/ESR1/AR	3
	MF	GO:0001099	basal RNA polymerase II transcription machinery binding	0.000661514	0.00306702	0.00148762	TP53/ESR1/AR	3
	MF	GO:0001618	virus receptor activity	0.00071665	0.00317819	0.00154154	HTR2A/ICAM1/EGFR	3
	MF	GO:0104005	hijacked molecular function	0.00071665	0.00317819	0.00154154	HTR2A/ICAM1/EGFR	3
	MF	GO:0033613	activating transcription factor binding	0.00107234	0.00465442	0.00225756	JUN/FOS/MYC	3
	MF	GO:0005158	insulin receptor binding	0.00123251	0.00523815	0.00254069	INS/IGF1	2
	MF	GO:0015464	acetylcholine receptor activity	0.00134786	0.00549927	0.00266734	CHRM1/CHRM3	2
	MF	GO:0070412	R-SMAD binding	0.00134786	0.00549927	0.00266734	JUN/FOS	2
	MF	GO:0019207	kinase regulator activity	0.00143723	0.00574892	0.00278843	EGF/IL2/CCND1/CASP3	4
	MF	GO:0001965	G-protein alpha-subunit binding	0.00146818	0.00575979	0.00279371	HTR2B/HTR2A	2
	MF	GO:0035035	histone acetyltransferase binding	0.00214355	0.00825065	0.00400186	TP53/STAT1	2
	MF	GO:0005164	tumor necrosis factor receptor binding	0.00244769	0.00924682	0.00448504	TNF/STAT1	2
	MF	GO:0071855	neuropeptide receptor binding	0.00260695	0.00966941	0.00469001	EDN1/EDN2	2
Module 3	BP	GO:0007189	adenylate cyclase-activating G protein-coupled receptor signaling pathway	3.76562e-22	1.84892e-19	6.50064e-20	MC4R/CALCR/CALCA/PTGER2/ADORA2B/PTGER4/ADRB3/DRD5/ADRB1/DRD1	10
	BP	GO:0019933	cAMP-mediated signaling	7.97433e-21	1.9577e-18	6.88311e-19	MC4R/CALCR/CALCA/PTGER2/ADORA2B/PTGER4/ADRB3/DRD5/ADRB1/DRD1	10
	BP	GO:0019935	cyclic-nucleotide-mediated signaling	3.32445e-20	5.40533e-18	1.90047e-18	MC4R/CALCR/CALCA/PTGER2/ADORA2B/PTGER4/ADRB3/DRD5/ADRB1/DRD1	10
	BP	GO:0007188	adenylate cyclase-modulating G protein-coupled receptor signaling pathway	4.40353e-20	5.40533e-18	1.90047e-18	MC4R/CALCR/CALCA/PTGER2/ADORA2B/PTGER4/ADRB3/DRD5/ADRB1/DRD1	10
	BP	GO:0007187	G protein-coupled receptor signaling pathway, coupled to cyclic nucleotide second messenger	1.97106e-19	1.93558e-17	6.80535e-18	MC4R/CALCR/CALCA/PTGER2/ADORA2B/PTGER4/ADRB3/DRD5/ADRB1/DRD1	10
	BP	GO:0019932	second-messenger-mediated signaling	4.67097e-17	3.82241e-15	1.34393e-15	MC4R/CALCR/CALCA/PTGER2/ADORA2B/PTGER4/ADRB3/DRD5/ADRB1/DRD1	10
	BP	GO:0007190	activation of adenylate cyclase activity	6.64576e-12	4.66153e-10	1.63895e-10	ADORA2B/ADRB3/DRD5/ADRB1/DRD1	5
	BP	GO:0042311	vasodilation	1.48144e-09	9.09233e-08	3.19679e-08	ADORA2B/ADRB3/ADRB1/DRD1	4
	BP	GO:0035296	regulation of tube diameter	6.00456e-09	2.54467e-07	8.94685e-08	ADORA2B/ADRB3/DRD5/ADRB1/DRD1	5
	BP	GO:0050880	regulation of blood vessel size	6.00456e-09	2.54467e-07	8.94685e-08	ADORA2B/ADRB3/DRD5/ADRB1/DRD1	5
	BP	GO:0097746	regulation of blood vessel diameter	6.00456e-09	2.54467e-07	8.94685e-08	ADORA2B/ADRB3/DRD5/ADRB1/DRD1	5
	BP	GO:0035150	regulation of tube size	6.21915e-09	2.54467e-07	8.94685e-08	ADORA2B/ADRB3/DRD5/ADRB1/DRD1	5
	BP	GO:0003018	vascular process in circulatory system	1.56486e-08	5.91034e-07	2.07803e-07	ADORA2B/ADRB3/DRD5/ADRB1/DRD1	5
	BP	GO:0097755	positive regulation of blood vessel diameter	1.86198e-08	6.53024e-07	2.29598e-07	ADORA2B/ADRB3/ADRB1/DRD1	4
	BP	GO:0006874	cellular calcium ion homeostasis	4.07564e-08	1.33409e-06	4.69057e-07	CALCR/CALCA/PTGER2/PTGER4/DRD5/DRD1	6
	BP	GO:0055074	calcium ion homeostasis	4.81356e-08	1.47716e-06	5.19358e-07	CALCR/CALCA/PTGER2/PTGER4/DRD5/DRD1	6
	BP	GO:0072503	cellular divalent inorganic cation homeostasis	6.31324e-08	1.82341e-06	6.41097e-07	CALCR/CALCA/PTGER2/PTGER4/DRD5/DRD1	6
	BP	GO:0007204	positive regulation of cytosolic calcium ion concentration	3.31552e-07	9.04399e-06	3.17979e-06	CALCR/CALCA/PTGER2/PTGER4/DRD1	5
	BP	GO:0051480	regulation of cytosolic calcium ion concentration	5.78985e-07	1.49622e-05	5.26059e-06	CALCR/CALCA/PTGER2/PTGER4/DRD1	5
	BP	GO:0045776	negative regulation of blood pressure	1.65953e-06	4.07415e-05	1.43244e-05	ADRB3/DRD5/ADRB1	3
	BP	GO:0003044	regulation of systemic arterial blood pressure mediated by a chemical signal	2.01248e-06	4.70536e-05	1.65437e-05	ADRB3/DRD5/ADRB1	3
	BP	GO:0048871	multicellular organismal homeostasis	2.62212e-06	5.85208e-05	2.05754e-05	MC4R/CALCA/ADRB3/ADRB1/DRD1	5
	BP	GO:0007191	adenylate cyclase-activating dopamine receptor signaling pathway	1.1593e-05	0.000247486	8.7014e-05	DRD5/DRD1	2
	BP	GO:0003073	regulation of systemic arterial blood pressure	1.39999e-05	0.000286414	0.000100701	ADRB3/DRD5/ADRB1	3
	BP	GO:0002024	diet induced thermogenesis	1.69934e-05	0.000328794	0.000115601	MC4R/ADRB1	2
	BP	GO:0007200	phospholipase C-activating G protein-coupled receptor signaling pathway	1.74107e-05	0.000328794	0.000115601	CALCA/DRD5/DRD1	3
	BP	GO:0071380	cellular response to prostaglandin E stimulus	3.08618e-05	0.000561227	0.000197323	PTGER2/PTGER4	2
	BP	GO:0003085	negative regulation of systemic arterial blood pressure	4.39404e-05	0.000743956	0.000261569	ADRB3/ADRB1	2
	BP	GO:0007625	grooming behavior	4.39404e-05	0.000743956	0.000261569	MC4R/DRD1	2
	BP	GO:0031281	positive regulation of cyclase activity	5.93072e-05	0.000910972	0.00032029	ADORA2B/DRD5	2
	BP	GO:0071379	cellular response to prostaglandin stimulus	5.93072e-05	0.000910972	0.00032029	PTGER2/PTGER4	2
	BP	GO:1990845	adaptive thermogenesis	6.32986e-05	0.000910972	0.00032029	MC4R/ADRB3/ADRB1	3
	BP	GO:0007617	mating behavior	6.49369e-05	0.000910972	0.00032029	DRD5/DRD1	2
	BP	GO:0034695	response to prostaglandin E	6.49369e-05	0.000910972	0.00032029	PTGER2/PTGER4	2
	BP	GO:0051349	positive regulation of lyase activity	6.49369e-05	0.000910972	0.00032029	ADORA2B/DRD5	2
	BP	GO:0001659	temperature homeostasis	8.94498e-05	0.00119416	0.000419856	ADRB3/ADRB1/DRD1	3
	BP	GO:0002021	response to dietary excess	8.99874e-05	0.00119416	0.000419856	MC4R/ADRB1	2
	BP	GO:0008217	regulation of blood pressure	0.000103975	0.0013288	0.000467196	ADRB3/DRD5/ADRB1	3
	BP	GO:0001963	synaptic transmission, dopaminergic	0.000119078	0.0013288	0.000467196	DRD5/DRD1	2
	BP	GO:0019098	reproductive behavior	0.000119078	0.0013288	0.000467196	DRD5/DRD1	2
	BP	GO:0034694	response to prostaglandin	0.000119078	0.0013288	0.000467196	PTGER2/PTGER4	2
	BP	GO:0051482	positive regulation of cytosolic calcium ion concentration involved in phospholipase C-activating G protein-coupled signaling pathway	0.000119078	0.0013288	0.000467196	CALCA/DRD1	2
	BP	GO:0060292	long-term synaptic depression	0.000119078	0.0013288	0.000467196	DRD5/DRD1	2
	BP	GO:0071880	adenylate cyclase-activating adrenergic receptor signaling pathway	0.000119078	0.0013288	0.000467196	ADRB3/ADRB1	2
	BP	GO:0001975	response to amphetamine	0.00012698	0.00138549	0.000487128	DRD5/DRD1	2
	BP	GO:0071868	cellular response to monoamine stimulus	0.000143539	0.00146828	0.000516235	DRD5/DRD1	2
	BP	GO:0071870	cellular response to catecholamine stimulus	0.000143539	0.00146828	0.000516235	DRD5/DRD1	2
	BP	GO:0071875	adrenergic receptor signaling pathway	0.000143539	0.00146828	0.000516235	ADRB3/ADRB1	2
	BP	GO:0045777	positive regulation of blood pressure	0.000170258	0.00170606	0.000599835	DRD5/ADRB1	2
	BP	GO:0071867	response to monoamine	0.000179666	0.00172972	0.000608156	DRD5/DRD1	2
	BP	GO:0071869	response to catecholamine	0.000179666	0.00172972	0.000608156	DRD5/DRD1	2
	BP	GO:0007618	mating	0.00019923	0.00181152	0.000636916	DRD5/DRD1	2
	BP	GO:0042596	fear response	0.00019923	0.00181152	0.000636916	ADRB1/DRD1	2
	BP	GO:0045124	regulation of bone resorption	0.00019923	0.00181152	0.000636916	MC4R/CALCA	2
	BP	GO:0031279	regulation of cyclase activity	0.00023045	0.00205729	0.000723326	ADORA2B/DRD5	2
	BP	GO:0007212	dopamine receptor signaling pathway	0.000241355	0.00211616	0.000744026	DRD5/DRD1	2
	BP	GO:0014075	response to amine	0.000263911	0.00223414	0.000785505	DRD5/DRD1	2
	BP	GO:0051339	regulation of lyase activity	0.000263911	0.00223414	0.000785505	ADORA2B/DRD5	2
	BP	GO:0046850	regulation of bone remodeling	0.00028746	0.00239225	0.000841096	MC4R/CALCA	2
	BP	GO:0097366	response to bronchodilator	0.000324643	0.00265666	0.000934061	DRD5/DRD1	2
	BP	GO:0010524	positive regulation of calcium ion transport into cytosol	0.000364052	0.00293032	0.00103028	CALCR/DRD1	2
	BP	GO:0042220	response to cocaine	0.000377682	0.002991	0.00105161	DRD5/DRD1	2
	BP	GO:0071398	cellular response to fatty acid	0.00040568	0.00316173	0.00111164	PTGER2/PTGER4	2
	BP	GO:0045453	bone resorption	0.000479979	0.00368234	0.00129468	MC4R/CALCA	2
	BP	GO:1904427	positive regulation of calcium ion transmembrane transport	0.000629129	0.00473176	0.00166365	CALCR/DRD1	2
	BP	GO:0019226	transmission of nerve impulse	0.000646919	0.00473176	0.00166365	DRD5/DRD1	2
	BP	GO:0050805	negative regulation of synaptic transmission	0.000646919	0.00473176	0.00166365	DRD5/DRD1	2
	BP	GO:0033555	multicellular organismal response to stress	0.000664952	0.00473176	0.00166365	ADRB1/DRD1	2
	BP	GO:1903524	positive regulation of blood circulation	0.000664952	0.00473176	0.00166365	PTGER2/ADRB1	2
	BP	GO:0008306	associative learning	0.000758752	0.00517427	0.00181923	DRD5/DRD1	2
	BP	GO:0072347	response to anesthetic	0.000758752	0.00517427	0.00181923	DRD5/DRD1	2
	BP	GO:2000300	regulation of synaptic vesicle exocytosis	0.000758752	0.00517427	0.00181923	ADORA2B/DRD1	2
	BP	GO:1902803	regulation of synaptic vesicle transport	0.00087928	0.00591406	0.00207934	ADORA2B/DRD1	2
	BP	GO:0070542	response to fatty acid	0.00092138	0.00611348	0.00214945	PTGER2/PTGER4	2
	BP	GO:0006112	energy reserve metabolic process	0.00094279	0.00617213	0.00217007	MC4R/ADRB3	2
	BP	GO:0034103	regulation of tissue remodeling	0.00096444	0.00623079	0.00219069	MC4R/CALCA	2
	BP	GO:0097306	cellular response to alcohol	0.000986329	0.00628945	0.00221132	PTGER2/PTGER4	2
	BP	GO:0046849	bone remodeling	0.00100846	0.00634811	0.00223194	MC4R/CALCA	2
	BP	GO:1901655	cellular response to ketone	0.00107628	0.00668925	0.00235189	PTGER2/PTGER4	2
	BP	GO:0120162	positive regulation of cold-induced thermogenesis	0.00117004	0.00718109	0.00252481	ADRB3/ADRB1	2
	BP	GO:0007631	feeding behavior	0.0012676	0.00768382	0.00270157	MC4R/DRD1	2
	BP	GO:0010522	regulation of calcium ion transport into cytosol	0.00129258	0.0077397	0.00272122	CALCR/DRD1	2
	BP	GO:0050804	modulation of chemical synaptic transmission	0.00134312	0.00780991	0.0027459	ADORA2B/DRD5/DRD1	3
	BP	GO:0046928	regulation of neurotransmitter secretion	0.00134325	0.00780991	0.0027459	ADORA2B/DRD1	2
	BP	GO:0099177	regulation of trans-synaptic signaling	0.00135202	0.00780991	0.0027459	ADORA2B/DRD5/DRD1	3
	BP	GO:0006939	smooth muscle contraction	0.00150093	0.00856928	0.00301289	ADORA2B/DRD1	2
	BP	GO:0017158	regulation of calcium ion-dependent exocytosis	0.00155537	0.00858077	0.00301693	ADORA2B/DRD1	2
	BP	GO:0043279	response to alkaloid	0.00155537	0.00858077	0.00301693	DRD5/DRD1	2
	BP	GO:0098693	regulation of synaptic vesicle cycle	0.00155537	0.00858077	0.00301693	ADORA2B/DRD1	2
	BP	GO:0023061	signal release	0.00158687	0.00865724	0.00304382	MC4R/ADORA2B/DRD1	3
	BP	GO:0016079	synaptic vesicle exocytosis	0.00175329	0.00946006	0.00332608	ADORA2B/DRD1	2
	BP	GO:0051928	positive regulation of calcium ion transport	0.00187151	0.00998819	0.00351176	CALCR/DRD1	2
	MF	GO:1901338	catecholamine binding	2.47963e-10	8.43075e-09	2.08811e-09	ADRB3/DRD5/ADRB1/DRD1	4
	MF	GO:0004952	dopamine neurotransmitter receptor activity	1.29013e-05	0.00013399	3.31863e-05	DRD5/DRD1	2
	MF	GO:0004955	prostaglandin receptor activity	1.29013e-05	0.00013399	3.31863e-05	PTGER2/PTGER4	2
	MF	GO:0004954	prostanoid receptor activity	1.57635e-05	0.00013399	3.31863e-05	PTGER2/PTGER4	2
	MF	GO:0035240	dopamine binding	2.2342e-05	0.000151926	3.76286e-05	DRD5/DRD1	2
	MF	GO:0004953	icosanoid receptor activity	3.00577e-05	0.000158696	3.93054e-05	PTGER2/PTGER4	2
	MF	GO:0030594	neurotransmitter receptor activity	3.26726e-05	0.000158696	3.93054e-05	DRD5/ADRB1/DRD1	3
	MF	GO:0004935	adrenergic receptor activity	3.89084e-05	0.00016536	4.09562e-05	ADRB3/ADRB1	2
	MF	GO:0001965	G-protein alpha-subunit binding	7.87946e-05	0.000297669	7.37259e-05	DRD5/DRD1	2
	MF	GO:0017046	peptide hormone binding	0.000333213	0.00113292	0.0002806	MC4R/CALCR	2
	MF	GO:0008227	G protein-coupled amine receptor activity	0.000483342	0.00149397	0.000370023	ADRB3/ADRB1	2
	MF	GO:0070405	ammonium ion binding	0.000780139	0.00221039	0.000547466	DRD5/DRD1	2
	MF	GO:0042562	hormone binding	0.00143636	0.00375665	0.000930438	MC4R/CALCR	2
	MF	GO:0008528	G protein-coupled peptide receptor activity	0.00291273	0.00707378	0.00175202	MC4R/CALCR	2
	MF	GO:0001653	peptide receptor activity	0.0031522	0.00714499	0.00176966	MC4R/CALCR	2
