# Supplementary material for: A Multi-Scale Bioinformatics Study on Novel Mechanism of Xintong Granule for Treating Coronary Heart Disease by Network Pharmacology and Molecular Docking Verification
Source: Research Square preprint supplement (doi:10.21203/rs.3.rs-116130/v1), 2020-12-01
Supplement: Supplementary file 3 [file 7c36e6642e8365e191bc3142.xlsx]

## Sheet: Table S8 
Supplementary Table 8 The information of KEGG pathway enrichment analysis for each cluster
Module 1	ID	Description	pvalue	p.adjust	qvalue	geneID	Count
	hsa04080	Neuroactive ligand-receptor interaction	1.33048e-20	8.91421e-19	7.00252e-19	3350/152/1269/1813/134/3352/4543/4544/1268/151/140/1129/4988/4986/718/4985/150/3351	18
	hsa04022	cGMP-PKG signaling pathway	7.19877e-06	0.000241159	0.000189441	152/134/151/140/4985/150	6
	hsa04024	cAMP signaling pathway	3.12851e-05	0.0006987	0.000548861	3350/1813/134/3352/1129/3351	6
	hsa04061	Viral protein interaction with cytokine and cytokine receptor	0.000196918	0.00329837	0.00259102	3627/6373/3576/1236	4
	hsa04726	Serotonergic synapse	0.000336945	0.00451506	0.00354679	3350/3352/351/3351	4
	hsa04742	Taste transduction	0.00202681	0.0207243	0.0162799	3350/3352/3351	3
	hsa04062	Chemokine signaling pathway	0.00216522	0.0207243	0.0162799	3627/6373/3576/1236	4
	hsa04620	Toll-like receptor signaling pathway	0.00348193	0.0291611	0.0229074	3627/6373/3576	3
	hsa04071	Sphingolipid signaling pathway	0.00508453	0.0378515	0.0297341	134/140/4985	3
	hsa04060	Cytokine-cytokine receptor interaction	0.0103982	0.0696678	0.0547272	3627/6373/3576/1236	4
	hsa05134	Legionellosis	0.0123064	0.0749569	0.0588821	3576/718	2
	hsa04622	RIG-I-like receptor signaling pathway	0.0181887	0.101554	0.0797751	3627/3576	2
	hsa05133	Pertussis	0.0212336	0.109435	0.085966	3576/718	2
	hsa05032	Morphine addiction	0.0296951	0.139864	0.10987	134/4988	2
	hsa04657	IL-17 signaling pathway	0.0315258	0.139864	0.10987	3627/3576	2
	hsa04713	Circadian entrainment	0.0334005	0.139864	0.10987	4543/4544	2
	hsa05142	Chagas disease	0.0366205	0.144328	0.113376	3576/718	2
	hsa04915	Estrogen signaling pathway	0.0630039	0.234514	0.184222	4988/2852	2
	hsa05164	Influenza A	0.0913388	0.32209	0.253016	3627/3576	2
	hsa05167	Kaposi sarcoma-associated herpesvirus infection	0.108131	0.362238	0.284554	3576/718	2
	hsa05219	Bladder cancer	0.115506	0.368519	0.289489	3576	1
	hsa04015	Rap1 signaling pathway	0.128693	0.388296	0.305024	1813/1268	2
	hsa05030	Cocaine addiction	0.136501	0.388296	0.305024	1813	1
	hsa05144	Malaria	0.139091	0.388296	0.305024	3576	1
	hsa04923	Regulation of lipolysis in adipocytes	0.154478	0.414002	0.325218	134	1
	hsa05131	Shigellosis	0.161637	0.416526	0.327201	3576/718	2
	hsa04623	Cytosolic DNA-sensing pathway	0.172097	0.417757	0.328168	3627	1
	hsa04929	GnRH secretion	0.174585	0.417757	0.328168	2852	1
	hsa04924	Renin secretion	0.186918	0.422912	0.332217	134	1
	hsa05120	Epithelial cell signaling in Helicobacter pylori infection	0.189364	0.422912	0.332217	3576	1
	hsa05140	Leishmaniasis	0.206285	0.445842	0.350229	718	1
	hsa04610	Complement and coagulation cascades	0.225209	0.46116	0.362262	718	1
	hsa04540	Gap junction	0.232194	0.46116	0.362262	1813	1
	hsa05323	Rheumatoid arthritis	0.2437	0.46116	0.362262	3576	1
	hsa05150	Staphylococcus aureus infection	0.250525	0.46116	0.362262	718	1
	hsa01522	Endocrine resistance	0.255042	0.46116	0.362262	2852	1
	hsa04933	AGE-RAGE signaling pathway in diabetic complications	0.259533	0.46116	0.362262	3576	1
	hsa05146	Amoebiasis	0.263997	0.46116	0.362262	3576	1
	hsa04064	NF-kappa B signaling pathway	0.268436	0.46116	0.362262	3576	1
	hsa04668	TNF signaling pathway	0.285937	0.470792	0.369829	3627	1
	hsa04725	Cholinergic synapse	0.288097	0.470792	0.369829	1129	1
	hsa05135	Yersinia infection	0.323859	0.505375	0.396995	3576	1
	hsa04728	Dopaminergic synapse	0.327952	0.505375	0.396995	1813	1
	hsa05322	Systemic lupus erythematosus	0.336065	0.505375	0.396995	718	1
	hsa04072	Phospholipase D signaling pathway	0.359847	0.505375	0.396995	3576	1
	hsa04723	Retrograde endocannabinoid signaling	0.359847	0.505375	0.396995	1268	1
	hsa04932	Non-alcoholic fatty liver disease	0.36373	0.505375	0.396995	3576	1
	hsa04145	Phagosome	0.367591	0.505375	0.396995	718	1
	hsa04218	Cellular senescence	0.375246	0.505375	0.396995	3576	1
	hsa05160	Hepatitis C	0.377145	0.505375	0.396995	3627	1
	hsa05161	Hepatitis B	0.386561	0.507835	0.398928	3576	1
	hsa05152	Tuberculosis	0.419341	0.522877	0.410744	718	1
	hsa04621	NOD-like receptor signaling pathway	0.421112	0.522877	0.410744	3576	1
	hsa05034	Alcoholism	0.431629	0.522877	0.410744	1813	1
	hsa05202	Transcriptional misregulation in cancer	0.440254	0.522877	0.410744	3576	1
	hsa05130	Pathogenic Escherichia coli infection	0.441964	0.522877	0.410744	3576	1
	hsa04020	Calcium signaling pathway	0.455463	0.522877	0.410744	1129	1
	hsa05169	Epstein-Barr virus infection	0.457128	0.522877	0.410744	3627	1
	hsa05203	Viral carcinogenesis	0.460444	0.522877	0.410744	718	1
	hsa05132	Salmonella infection	0.475127	0.523626	0.411333	3576	1
	hsa04810	Regulation of actin cytoskeleton	0.476734	0.523626	0.411333	1129	1
	hsa05163	Human cytomegalovirus infection	0.494109	0.533957	0.419447	3576	1
	hsa04714	Thermogenesis	0.503352	0.535311	0.420511	1268	1
	hsa05012	Parkinson disease	0.530119	0.554968	0.435953	1813	1
	hsa04151	PI3K-Akt signaling pathway	0.660754	0.681085	0.535024	1129	1
	hsa05010	Alzheimer disease	0.676297	0.686544	0.539312	351	1
	hsa05168	Herpes simplex virus 1 infection	0.779011	0.779011	0.611949	718	1
Module 2	hsa04933	AGE-RAGE signaling pathway in diabetic complications	6.5604e-19	1.2596e-16	2.96944e-17	7124/1906/6772/595/836/7422/5594/6347/6774/3725/3383/5595/207/4846/3569	15
	hsa04066	HIF-1 signaling pathway	4.56009e-15	4.19797e-13	9.89652e-14	1950/1906/3630/3162/7422/5594/6774/5595/3479/207/4846/3569/1956	13
	hsa04668	TNF signaling pathway	6.55932e-15	4.19797e-13	9.89652e-14	7124/1906/836/5594/6347/3725/2353/3383/5595/5743/207/4318/3569	13
	hsa05167	Kaposi sarcoma-associated herpesvirus infection	1.1812e-14	5.66978e-13	1.33662e-13	7157/6772/595/836/7422/5594/6774/3725/2353/3383/5595/4609/5743/207/3569	15
	hsa05210	Colorectal cancer	3.5096e-13	1.14133e-11	2.69063e-12	1950/7157/595/836/5594/3725/2353/5595/4609/207/1956	11
	hsa05219	Bladder cancer	3.56664e-13	1.14133e-11	2.69063e-12	1950/7157/595/7422/5594/5595/4609/4318/1956	9
	hsa04020	Calcium signaling pathway	6.66987e-13	1.82945e-11	4.31285e-12	1950/5021/147/3358/1909/146/148/3357/3269/3356/1128/1131/4846/1956	14
	hsa05161	Hepatitis B	8.44529e-13	1.86737e-11	4.40225e-12	7157/7124/6772/836/5594/6774/3725/2353/5595/4609/207/4318/3569	13
	hsa05205	Proteoglycans in cancer	8.75331e-13	1.86737e-11	4.40225e-12	7157/7124/2099/595/836/7422/5594/6774/5595/4609/3479/207/4318/1956	14
	hsa05215	Prostate cancer	1.37204e-12	2.63432e-11	6.21031e-12	1950/7157/3630/595/5594/5595/367/3479/207/4318/1956	11
	hsa01522	Endocrine resistance	1.54001e-12	2.68803e-11	6.3369e-12	7157/2099/595/5594/3725/2353/5595/3479/207/4318/1956	11
	hsa05418	Fluid shear stress and atherosclerosis	3.09641e-12	4.64023e-11	1.09391e-11	7157/7124/1906/3162/7422/6347/3725/2353/3383/207/4846/4318	12
	hsa05163	Human cytomegalovirus infection	3.14182e-12	4.64023e-11	1.09391e-11	7157/7124/595/836/7422/5594/6347/6774/5595/4609/5743/207/3569/1956	14
	hsa05212	Pancreatic cancer	3.53271e-12	4.84486e-11	1.14216e-11	1950/7157/6772/595/7422/5594/6774/5595/207/1956	10
	hsa05224	Breast cancer	6.05635e-12	7.75212e-11	1.82753e-11	1950/7157/2099/595/5594/3725/2353/5595/4609/3479/207/1956	12
	hsa05160	Hepatitis C	1.32768e-11	1.59322e-10	3.75594e-11	1950/7157/7124/6772/595/836/5594/6774/5595/4609/207/1956	12
	hsa04657	IL-17 signaling pathway	3.13352e-11	3.53904e-10	8.34312e-11	7124/836/5594/6347/3725/2353/5595/5743/4318/3569	10
	hsa04917	Prolactin signaling pathway	5.94471e-11	6.34102e-10	1.49487e-10	2099/6772/3630/595/5594/6774/2353/5595/207	9
	hsa04080	Neuroactive ligand-receptor interaction	6.52945e-11	6.59819e-10	1.55549e-10	5021/5020/147/3358/1906/1909/146/148/3357/3269/2147/3356/1128/1131/1907	15
	hsa04151	PI3K-Akt signaling pathway	1.10971e-10	1.06465e-09	2.50986e-10	1950/7157/3630/3558/595/7422/5594/5595/1128/4609/3479/207/4846/3569/1956	15
	hsa04010	MAPK signaling pathway	1.16446e-10	1.06465e-09	2.50986e-10	1950/7157/7124/3630/836/7422/5594/3725/2353/5595/4609/3479/207/1956	14
	hsa01521	EGFR tyrosine kinase inhibitor resistance	1.81939e-10	1.58784e-09	3.74325e-10	1950/7422/5594/6774/5595/3479/207/3569/1956	9
	hsa05213	Endometrial cancer	4.30297e-10	3.59204e-09	8.46808e-10	1950/7157/595/5594/5595/4609/207/1956	8
	hsa05235	PD-L1 expression and PD-1 checkpoint pathway in cancer	5.41374e-10	4.33099e-09	1.02101e-09	1950/6772/5594/6774/3725/2353/5595/207/1956	9
	hsa05166	Human T-cell leukemia virus 1 infection	6.56289e-10	5.0403e-09	1.18823e-09	7157/7124/3558/595/5594/3725/2353/3383/5595/4609/207/3569	12
	hsa04926	Relaxin signaling pathway	7.49909e-10	5.53779e-09	1.30551e-09	1906/7422/5594/3725/2353/5595/207/4846/4318/1956	10
	hsa04068	FoxO signaling pathway	8.73125e-10	6.20889e-09	1.46372e-09	1950/3630/595/5594/6774/5595/3479/207/3569/1956	10
	hsa05162	Measles	1.56602e-09	1.0579e-08	2.49396e-09	7157/6772/3558/595/836/6774/3725/2353/207/3569	10
	hsa05223	Non-small cell lung cancer	1.59788e-09	1.0579e-08	2.49396e-09	1950/7157/595/5594/6774/5595/207/1956	8
	hsa05142	Chagas disease	1.85857e-09	1.18949e-08	2.80416e-09	7124/3558/5594/6347/3725/2353/5595/207/3569	9
	hsa04625	C-type lectin receptor signaling pathway	2.2129e-09	1.37057e-08	3.23106e-09	7124/6772/3558/5594/3725/5595/5743/207/3569	9
	hsa05218	Melanoma	2.54843e-09	1.52906e-08	3.60468e-09	1950/7157/595/5594/5595/3479/207/1956	8
	hsa05214	Glioma	3.55164e-09	2.06641e-08	4.87147e-09	1950/7157/595/5594/5595/3479/207/1956	8
	hsa05169	Epstein-Barr virus infection	4.1071e-09	2.3193e-08	5.46766e-09	7157/7124/6772/595/836/6774/3725/3383/4609/207/3569	11
	hsa04921	Oxytocin signaling pathway	4.26865e-09	2.34166e-08	5.52036e-09	5021/5020/595/5594/3725/2353/5595/5743/4846/1956	10
	hsa04024	cAMP signaling pathway	8.31146e-09	4.43278e-08	1.04501e-08	5021/5020/1906/1909/5594/3725/2353/5595/1128/207/1907	11
	hsa05135	Yersinia infection	1.60937e-08	8.35131e-08	1.96879e-08	7124/3558/5594/6347/3725/2353/5595/207/3569	9
	hsa04915	Estrogen signaling pathway	2.71882e-08	1.37372e-07	3.23849e-08	2099/5594/3725/2353/5595/207/4846/4318/1956	9
	hsa05206	MicroRNAs in cancer	3.37304e-08	1.66058e-07	3.91473e-08	7157/595/836/3162/7422/5594/6774/5595/4609/5743/4318/1956	12
	hsa04620	Toll-like receptor signaling pathway	4.85872e-08	2.33219e-07	5.49803e-08	7124/6772/5594/3725/2353/5595/207/3569	8
	hsa04659	Th17 cell differentiation	6.07899e-08	2.84675e-07	6.71108e-08	6772/3558/5594/6774/3725/2353/5595/3569	8
	hsa05165	Human papillomavirus infection	6.96984e-08	3.18621e-07	7.51135e-08	1950/7157/7124/6772/595/836/7422/5594/5595/5743/207/1956	12
	hsa05133	Pertussis	1.04604e-07	4.67071e-07	1.1011e-07	7124/836/5594/3725/2353/5595/3569	7
	hsa04630	JAK-STAT signaling pathway	1.09541e-07	4.77999e-07	1.12686e-07	1950/6772/3558/595/6774/4609/207/3569/1956	9
	hsa05140	Leishmaniasis	1.14625e-07	4.89068e-07	1.15296e-07	7124/6772/5594/3725/2353/5595/5743	7
	hsa04022	cGMP-PKG signaling pathway	1.42317e-07	5.94018e-07	1.40037e-07	147/1909/146/148/3630/5594/5595/207/4846	9
	hsa04919	Thyroid hormone signaling pathway	1.59131e-07	6.50068e-07	1.53251e-07	7157/2099/6772/595/5594/5595/4609/207	8
	hsa05164	Influenza A	1.74395e-07	6.9758e-07	1.64451e-07	7124/6772/836/5594/6347/3383/5595/207/3569	9
	hsa04012	ErbB signaling pathway	2.2817e-07	8.94055e-07	2.10769e-07	1950/5594/3725/5595/4609/207/1956	7
	hsa04540	Gap junction	2.90113e-07	1.11403e-06	2.62629e-07	1950/3358/3357/5594/3356/5595/1956	7
	hsa04270	Vascular smooth muscle contraction	3.7147e-07	1.39848e-06	3.29685e-07	147/1906/1909/146/148/5594/5595/1907	8
	hsa04210	Apoptosis	3.93192e-07	1.45179e-06	3.42252e-07	7157/7124/836/5594/3725/2353/5595/207	8
	hsa05323	Rheumatoid arthritis	4.24723e-07	1.53862e-06	3.62723e-07	7124/7422/6347/3725/2353/3383/3569	7
	hsa04370	VEGF signaling pathway	5.11361e-07	1.81817e-06	4.28627e-07	7422/5594/5595/5743/207/4846	6
	hsa05231	Choline metabolism in cancer	6.08458e-07	2.12407e-06	5.00741e-07	1950/5594/3725/2353/5595/207/1956	7
	hsa04510	Focal adhesion	6.89551e-07	2.36417e-06	5.57344e-07	1950/595/7422/5594/3725/5595/3479/207/1956	9
	hsa05226	Gastric cancer	7.91466e-07	2.66599e-06	6.28496e-07	1950/7157/595/5594/5595/4609/207/1956	8
	hsa04660	T cell receptor signaling pathway	9.13075e-07	2.98094e-06	7.02744e-07	7124/3558/5594/3725/2353/5595/207	7
	hsa05321	Inflammatory bowel disease	9.16019e-07	2.98094e-06	7.02744e-07	7124/6772/3558/6774/3725/3569	6
	hsa05221	Acute myeloid leukemia	1.09824e-06	3.51437e-06	8.28498e-07	595/5594/6774/5595/4609/207	6
	hsa05132	Salmonella infection	1.12242e-06	3.53287e-06	8.32859e-07	7124/836/5594/3725/2353/5595/4609/207/3569	9
	hsa05216	Thyroid cancer	1.16624e-06	3.61157e-06	8.51412e-07	7157/595/5594/5595/4609	5
	hsa05230	Central carbon metabolism in cancer	1.42635e-06	4.34697e-06	1.02478e-06	7157/5594/5595/4609/207/1956	6
	hsa05145	Toxoplasmosis	1.51011e-06	4.53032e-06	1.068e-06	7124/6772/836/5594/6774/5595/207	7
	hsa04726	Serotonergic synapse	1.80543e-06	5.33295e-06	1.25722e-06	3358/3357/836/5594/3356/5595/5743	7
	hsa05225	Hepatocellular carcinoma	1.96602e-06	5.71932e-06	1.3483e-06	7157/595/3162/5594/5595/4609/207/1956	8
	hsa04935	Growth hormone synthesis, secretion and action	2.27316e-06	6.51413e-06	1.53568e-06	6772/5594/6774/2353/5595/3479/207	7
	hsa05220	Chronic myeloid leukemia	2.32394e-06	6.5617e-06	1.54689e-06	7157/595/5594/5595/4609/207	6
	hsa04380	Osteoclast differentiation	3.70564e-06	1.03113e-05	2.43085e-06	7124/6772/5594/3725/2353/5595/207	7
	hsa05130	Pathogenic Escherichia coli infection	5.54495e-06	1.5209e-05	3.58546e-06	7124/836/5594/3725/2147/2353/5595/3569	8
	hsa04658	Th1 and Th2 cell differentiation	7.12697e-06	1.90053e-05	4.48041e-06	6772/3558/5594/3725/2353/5595	6
	hsa05222	Small cell lung cancer	7.12697e-06	1.90053e-05	4.48041e-06	7157/595/836/4609/5743/207	6
	hsa04072	Phospholipase D signaling pathway	9.70127e-06	2.55157e-05	6.01521e-06	1950/3630/5594/2147/5595/207/1956	7
	hsa04015	Rap1 signaling pathway	1.03346e-05	2.68141e-05	6.32131e-06	1950/3630/7422/5594/5595/3479/207/1956	8
	hsa04932	Non-alcoholic fatty liver disease	1.05961e-05	2.7126e-05	6.39484e-06	7124/3630/836/3725/2353/207/3569	7
	hsa04810	Regulation of actin cytoskeleton	1.18668e-05	2.99794e-05	7.06751e-06	1950/3630/5594/2147/5595/1128/1131/1956	8
	hsa04218	Cellular senescence	1.37018e-05	3.41656e-05	8.05438e-06	7157/595/5594/5595/4609/207/3569	7
	hsa05010	Alzheimer disease	1.43224e-05	3.52552e-05	8.31126e-06	7124/3630/836/5594/5595/1128/5743/207/1131/3569	10
	hsa04931	Insulin resistance	1.79822e-05	4.37036e-05	1.03029e-05	7124/3630/6774/207/4846/3569	6
	hsa04014	Ras signaling pathway	2.13608e-05	5.12659e-05	1.20857e-05	1950/3630/7422/5594/5595/3479/207/1956	8
	hsa04725	Cholinergic synapse	2.32897e-05	5.52052e-05	1.30144e-05	5594/2353/5595/1128/207/1131	6
	hsa05211	Renal cell carcinoma	2.65923e-05	6.22649e-05	1.46787e-05	7422/5594/3725/5595/207	5
	hsa04071	Sphingolipid signaling pathway	3.12561e-05	7.23032e-05	1.70452e-05	7157/7124/5594/5595/207/4846	6
	hsa05152	Tuberculosis	3.46544e-05	7.90571e-05	1.86374e-05	7124/6772/836/5594/5595/207/3569	7
	hsa01524	Platinum drug resistance	3.49992e-05	7.90571e-05	1.86374e-05	7157/836/5594/5595/207	5
	hsa04621	NOD-like receptor signaling pathway	3.59102e-05	8.01716e-05	1.89001e-05	7124/6772/5594/6347/3725/5595/3569	7
	hsa04960	Aldosterone-regulated sodium reabsorption	3.73374e-05	8.23999e-05	1.94254e-05	3630/5594/5595/3479	4
	hsa04662	B cell receptor signaling pathway	6.14194e-05	0.000134006	3.15913e-05	5594/3725/2353/5595/207	5
	hsa05203	Viral carcinogenesis	7.69601e-05	0.000166026	3.914e-05	7157/595/836/5594/6774/3725/5595	7
	hsa04550	Signaling pathways regulating pluripotency of stem cells	8.76886e-05	0.000187069	4.41007e-05	5594/6774/5595/4609/3479/207	6
	hsa04930	Type II diabetes mellitus	8.917e-05	0.000188139	4.43529e-05	7124/3630/5594/5595	4
	hsa05170	Human immunodeficiency virus 1 infection	9.80743e-05	0.000204677	4.82516e-05	7124/836/5594/3725/2353/5595/207	7
	hsa04261	Adrenergic signaling in cardiomyocytes	0.000110123	0.000227351	5.3597e-05	147/146/148/5594/5595/207	6
	hsa05144	Malaria	0.000123957	0.00025319	5.96883e-05	7124/6347/3383/3569	4
	hsa04150	mTOR signaling pathway	0.00013691	0.000276703	6.52316e-05	7124/3630/5594/5595/3479/207	6
	hsa04914	Progesterone-mediated oocyte maturation	0.000150831	0.000301662	7.11154e-05	3630/5594/5595/3479/207	5
	hsa04750	Inflammatory mediator regulation of TRP channels	0.000158161	0.000313062	7.38029e-05	3358/3357/3269/3356/3479	5
	hsa05131	Shigellosis	0.000223441	0.000437763	0.000103201	7157/7124/5594/3725/5595/207/1956	7
	hsa04722	Neurotrophin signaling pathway	0.000356706	0.000691793	0.000163087	7157/5594/3725/5595/207	5
	hsa04152	AMPK signaling pathway	0.00037079	0.000711916	0.000167831	148/3630/595/3479/207	5
	hsa04062	Chemokine signaling pathway	0.000401777	0.000763773	0.000180056	6772/5594/6347/6774/5595/207	6
	hsa04664	Fc epsilon RI signaling pathway	0.000409552	0.000770922	0.000181742	7124/5594/5595/207	4
	hsa04611	Platelet activation	0.000431384	0.000804133	0.000189571	5594/2147/5595/207/4846	5
	hsa04114	Oocyte meiosis	0.000499188	0.000921578	0.000217258	3630/5594/5595/367/3479	5
	hsa04115	p53 signaling pathway	0.000537146	0.00098221	0.000231552	7157/595/836/3479	4
	hsa04650	Natural killer cell mediated cytotoxicity	0.000555098	0.00100546	0.000237033	7124/836/5594/3383/5595	5
	hsa04371	Apelin signaling pathway	0.00068094	0.00122187	0.000288052	595/5594/5595/207/4846	5
	hsa05143	African trypanosomiasis	0.00090741	0.00161317	0.000380299	7124/3383/3569	3
	hsa04211	Longevity regulating pathway	0.00113446	0.00199218	0.000469647	7157/3630/3479/207	4
	hsa05020	Prion diseases	0.00114135	0.00199218	0.000469647	5594/5595/3569	3
	hsa05410	Hypertrophic cardiomyopathy	0.00118276	0.00204586	0.000482302	7124/1906/3479/3569	4
	hsa05332	Graft-versus-host disease	0.00131661	0.00225065	0.000530582	7124/3558/3569	3
	hsa04912	GnRH signaling pathway	0.00133633	0.00225065	0.000530582	5594/3725/5595/1956	4
	hsa04970	Salivary secretion	0.00133633	0.00225065	0.000530582	147/146/148/1131	4
	hsa04350	TGF-beta signaling pathway	0.00139047	0.00232149	0.00054728	7124/5594/5595/4609	4
	hsa04940	Type I diabetes mellitus	0.00141025	0.0023342	0.000550277	7124/3630/3558	3
	hsa04061	Viral protein interaction with cytokine and cytokine receptor	0.00174803	0.00286856	0.00067625	7124/3558/6347/3569	4
	hsa04928	Parathyroid hormone synthesis, secretion and action	0.0021651	0.00352288	0.000830503	5594/2353/5595/1956	4
	hsa04913	Ovarian steroidogenesis	0.00231184	0.00373004	0.00087934	3630/3479/5743	3
	hsa04923	Regulation of lipolysis in adipocytes	0.00302217	0.00483341	0.00113946	3630/5743/207	3
	hsa05202	Transcriptional misregulation in cancer	0.00304606	0.00483341	0.00113946	7157/4609/3479/4318/3569	5
	hsa05134	Legionellosis	0.00317856	0.00500233	0.00117928	7124/836/3569	3
	hsa04730	Long-term depression	0.00367732	0.00569391	0.00134231	5594/5595/3479	3
	hsa05416	Viral myocarditis	0.00367732	0.00569391	0.00134231	595/836/3383	3
	hsa04213	Longevity regulating pathway - multiple species	0.00403494	0.00619766	0.00146107	3630/3479/207	3
	hsa04929	GnRH secretion	0.00441308	0.00672469	0.00158532	5594/5595/207	3
	hsa04140	Autophagy - animal	0.00544799	0.00804986	0.00189772	3630/5594/5595/207	4
	hsa04910	Insulin signaling pathway	0.00544799	0.00804986	0.00189772	3630/5594/5595/207	4
	hsa04920	Adipocytokine signaling pathway	0.00545043	0.00804986	0.00189772	7124/6774/207	3
	hsa04924	Renin secretion	0.00545043	0.00804986	0.00189772	1906/1909/1907	3
	hsa05120	Epithelial cell signaling in Helicobacter pylori infection	0.00567398	0.00831607	0.00196048	836/3725/1956	3
	hsa04520	Adherens junction	0.00590299	0.00858617	0.00202415	5594/5595/1956	3
	hsa04934	Cushing syndrome	0.00838722	0.0121079	0.00285438	595/5594/5595/1956	4
	hsa04310	Wnt signaling pathway	0.00935775	0.0134081	0.00316091	7157/595/3725/4609	4
	hsa01523	Antifolate resistance	0.0112316	0.0159738	0.00376576	7124/3569	2
	hsa04666	Fc gamma R-mediated phagocytosis	0.0123825	0.0174812	0.00412111	5594/5595/207	3
	hsa05168	Herpes simplex virus 1 infection	0.0124915	0.0175063	0.00412703	7157/7124/6772/836/6347/207/3569	7
	hsa04713	Circadian entrainment	0.0138684	0.0192952	0.00454876	5594/2353/5595	3
	hsa04916	Melanogenesis	0.015452	0.0213438	0.00503172	1906/5594/5595	3
	hsa05146	Amoebiasis	0.0158633	0.0217554	0.00512874	7124/836/3569	3
	hsa05330	Allograft rejection	0.0165943	0.0225862	0.00532459	7124/3558	2
	hsa04064	NF-kappa B signaling pathway	0.0167044	0.0225862	0.00532459	7124/3383/5743	3
	hsa04216	Ferroptosis	0.0191667	0.0257342	0.00606674	7157/3162	2
	hsa04110	Cell cycle	0.0264835	0.0353113	0.00832448	7157/595/4609	3
	hsa04672	Intestinal immune network for IgA production	0.0267775	0.0354571	0.00835886	3558/3569	2
	hsa04723	Retrograde endocannabinoid signaling	0.0415037	0.0545802	0.012867	5594/5595/5743	3
	hsa04720	Long-term potentiation	0.0474773	0.0620111	0.0146188	5594/5595	2
	hsa04137	Mitophagy - animal	0.0487574	0.0632529	0.0149116	7157/3725	2
	hsa04217	Necroptosis	0.0495617	0.0638647	0.0150558	7124/6772/6774	3
	hsa05031	Amphetamine addiction	0.0500502	0.0640642	0.0151029	3725/2353	2
	hsa04060	Cytokine-cytokine receptor interaction	0.0659338	0.0838363	0.019764	7124/3558/6347/3569	4
	hsa04911	Insulin secretion	0.0738043	0.0932265	0.0219777	3630/1131	2
	hsa05414	Dilated cardiomyopathy	0.0891621	0.11189	0.0263775	7124/3479	2
	hsa04640	Hematopoietic cell lineage	0.0939427	0.117123	0.0276113	7124/3569	2
	hsa00220	Arginine biosynthesis	0.104168	0.129034	0.0304193	4846	1
	hsa04670	Leukocyte transendothelial migration	0.118888	0.145392	0.0342755	3383/4318	2
	hsa04724	Glutamatergic synapse	0.118888	0.145392	0.0342755	5594/5595	2
	hsa04950	Maturity onset diabetes of the young	0.127364	0.154771	0.0364866	3630	1
	hsa05310	Asthma	0.149972	0.180853	0.0426352	7124	1
	hsa04728	Dopaminergic synapse	0.150711	0.180853	0.0426352	2353/207	2
	hsa04215	Apoptosis - multiple species	0.154425	0.184159	0.0434147	836	1
	hsa04390	Hippo signaling pathway	0.197285	0.232894	0.0549038	595/4609	2
	hsa00860	Porphyrin and chlorophyll metabolism	0.197717	0.232894	0.0549038	3162	1
	hsa04530	Tight junction	0.206827	0.242138	0.0570831	595/3725	2
	hsa04973	Carbohydrate digestion and absorption	0.218545	0.254306	0.0599516	207	1
	hsa05030	Cocaine addiction	0.226727	0.262238	0.0618215	3725	1
	hsa00330	Arginine and proline metabolism	0.230786	0.263756	0.0621793	4846	1
	hsa04340	Hedgehog signaling pathway	0.230786	0.263756	0.0621793	595	1
	hsa04961	Endocrine and other factor-regulated calcium reabsorption	0.242841	0.273398	0.0644524	2099	1
	hsa05320	Autoimmune thyroid disease	0.242841	0.273398	0.0644524	3558	1
	hsa04360	Axon guidance	0.243495	0.273398	0.0644524	5594/5595	2
	hsa05034	Alcoholism	0.25516	0.284829	0.0671473	5594/5595	2
	hsa04978	Mineral absorption	0.2664	0.295657	0.0696999	3162	1
	hsa00590	Arachidonic acid metabolism	0.281706	0.307316	0.0724484	5743	1
	hsa04623	Cytosolic DNA-sensing pathway	0.281706	0.307316	0.0724484	3569	1
	hsa05217	Basal cell carcinoma	0.281706	0.307316	0.0724484	7157	1
	hsa05014	Amyotrophic lateral sclerosis	0.295316	0.320343	0.0755193	7157/7124/836	3
	hsa04622	RIG-I-like receptor signaling pathway	0.307746	0.331951	0.0782559	7124	1
	hsa04971	Gastric acid secretion	0.32933	0.353248	0.0832767	1131	1
	hsa04612	Antigen processing and presentation	0.336378	0.358803	0.0845862	7124	1
	hsa05204	Chemical carcinogenesis	0.350257	0.371543	0.0875897	5743	1
	hsa04610	Complement and coagulation cascades	0.36048	0.380287	0.0896509	2147	1
	hsa04742	Taste transduction	0.363853	0.381747	0.0899952	1131	1
	hsa05012	Parkinson disease	0.374834	0.391131	0.0922075	7157/836	2
	hsa05150	Staphylococcus aureus infection	0.396639	0.411646	0.0970438	3383	1
	hsa04972	Pancreatic secretion	0.415512	0.428916	0.101115	1131	1
	hsa04922	Glucagon signaling pathway	0.427773	0.43921	0.103542	207	1
	hsa05016	Huntington disease	0.478231	0.488406	0.11514	7157/836	2
	hsa05017	Spinocerebellar ataxia	0.504209	0.512212	0.120752	207	1
	hsa05322	Systemic lupus erythematosus	0.51206	0.51745	0.121986	7124	1
	hsa04514	Cell adhesion molecules	0.5447	0.547552	0.129083	3383	1
	hsa04144	Endocytosis	0.732287	0.732287	0.172634	1956	1
Module 3	hsa04080	Neuroactive ligand-receptor interaction	1.63947e-14	3.77077e-13	1.72575e-13	4160/799/796/5732/136/5734/155/1816/153/1812	10
	hsa04924	Renin secretion	9.99222e-07	1.1491e-05	5.25906e-06	5732/5734/155/153	4
	hsa04020	Calcium signaling pathway	2.10349e-06	1.61267e-05	7.38065e-06	136/155/1816/153/1812	5
	hsa04024	cAMP signaling pathway	9.32938e-05	0.000536439	0.00024551	5732/1816/153/1812	4
	hsa04923	Regulation of lipolysis in adipocytes	0.00206434	0.00949596	0.00434598	155/153	2
	hsa04540	Gap junction	0.00502357	0.0183853	0.00841431	153/1812	2
	hsa04970	Salivary secretion	0.00559552	0.0183853	0.00841431	155/153	2
	hsa04750	Inflammatory mediator regulation of TRP channels	0.00644447	0.0185279	0.00847957	5732/5734	2
	hsa04728	Dopaminergic synapse	0.0110198	0.0264625	0.012111	1816/1812	2
	hsa04270	Vascular smooth muscle contraction	0.0115054	0.0264625	0.012111	796/136	2
	hsa04022	cGMP-PKG signaling pathway	0.0172609	0.0360911	0.0165176	155/153	2
	hsa05034	Alcoholism	0.0213712	0.0409614	0.0187466	136/1812	2
	hsa05163	Human cytomegalovirus infection	0.0301958	0.0534233	0.02445	5732/5734	2
	hsa05030	Cocaine addiction	0.0592684	0.0973696	0.0445627	1812	1
	hsa05031	Amphetamine addiction	0.0825369	0.126557	0.0579206	1812	1
	hsa05032	Morphine addiction	0.107533	0.153055	0.0700479	1812	1
	hsa05414	Dilated cardiomyopathy	0.113127	0.153055	0.0700479	153	1
	hsa04380	Osteoclast differentiation	0.148192	0.189357	0.0866621	799	1
	hsa04261	Adrenergic signaling in cardiomyocytes	0.17052	0.206419	0.094471	153	1
	hsa04015	Rap1 signaling pathway	0.232422	0.267286	0.122328	136	1
	hsa04714	Thermogenesis	0.252751	0.276822	0.126692	155	1
	hsa05012	Parkinson disease	0.269788	0.282051	0.129085	1812	1
	hsa05165	Human papillomavirus infection	0.343062	0.343062	0.157008	5734	1
