# Supplementary material for: A Multi-Scale Bioinformatics Study on Novel Mechanism of Xintong Granule for Treating Coronary Heart Disease by Network Pharmacology and Molecular Docking Verification
Source: Research Square preprint supplement (doi:10.21203/rs.3.rs-116130/v1), 2020-12-01
Supplement: Supplementary file 4 [file acf6133b6c058486b8733008.xlsx]

## Sheet: Table S4 
Supplementary Table 4 The Clusters of XTG-CHD Network
Cluster	Score (Density*#Nodes)	Nodes	Edges	Node IDs
1	26	26	325	CHRM2, ADORA3, CXCL11, ADRA2B, CNR1, GPR55, MTNR1B, MTNR1A, HTR1D, ADORA1, DRD2, CXCL10, CNR2, ADRA2C, HTR1A, HTR1B, ADRA2A, OPRD1, ANXA1, C3, CCR7, OPRK1, APP, GPER1, OPRM1, CXCL8
2	19.951	42	409	MAPK1, VEGFA, HMOX1, CASP3, CCND1, HTR2B, IL2, INS, STAT1, ADRA1A, ADRA1D, ESR1, EDNRA, EDN1, HTR2C, TNF, ADRA1B, TP53, OXT, OXTR, EGF, EGFR, IL6, EDN2, MMP9, NOS3, CHRM3, AKT1, PTGS2, IGF1, AR, MYC, CHRM1, MAPK3, ICAM1, HTR2A, FOS, F2, JUN, HRH1, STAT3, CCL2
3	10	10	45	DRD1, ADRB1, DRD5, ADRB3, PTGER4, ADORA2B, PTGER2, CALCA, CALCR, MC4R
4	9.2	11	46	CAV1, CACNB4, CACNA2D1, CACNB3, CACNA1S, CACNB1, CACNA1B, CACNA1D, CACNA1C, CACNB2, CACNG1
5	9.029	36	158	HIF1A, ARRB2, MCL1, NFKB1, LDLR, MET, IL4, IGF2, IFNG, ERBB2, WNT5A, PTEN, MMP2, IL13, LEP, IL10, BCL2L1, DNM3, APOB, TF, TGFB1, TIMP1, CREB1, IL1A, IL1B, PGR, VCAM1, CFTR, MMP1, CTNNB1, PPARG, MAPK8, ADRB2, ARRB1, MAPK14, RELA
6	7.429	8	26	PCNA, CCNA2, E2F1, CDK4, CDKN1B, CCND2, E2F2, CCNB1
7	5.6	16	42	PAH, MAOB, PRSS1, TPO, MMP8, TCN1, LTA4H, GGH, SLPI, LYZ, CTSD, GOT1, TYR, TH, IL4I1, GLB1
8	5	5	10	CYP1A2, GSTM2, GSTM1, GSTP1, CYP2E1
9	4.182	12	23	SULT1E1, CYP19A1, HSD17B1, CYP27B1, CYP1B1, CYP24A1, AHR, UGT1A1, CYP2R1, CYP17A1, AKR1C3, GC
10	4	11	20	CDK2, RB1, RUNX2, SPARC, CDC25C, MDM2, SPP1, TERT, PRKDC, CDKN2A, BRCA1
11	4	4	6	APOH, PON1, APOE, CETP
12	4	4	6	ADH1B, ALDH7A1, ADH1A, ADH1C
13	4	4	6	ENPP1, ADK, ENPP3, PDE4D
14	4	4	6	NRXN3, HOMER2, DLG4, NRXN1
15	3.333	4	5	ALDH2, ALDH1B1, MAOA, ACADM
16	3.333	4	5	NCOA2, RXRG, CYP1A1, NCOA1
17	3	3	3	APOA2, FGF23, IGFBP3
18	3	3	3	SERPINE1, ADIPOQ, CRP
19	3	9	12	RASA1, PRKCB, BIRC5, FADD, IKBKB, CHUK, HSP90AB1, TYMS, CHEK1
20	3	3	3	CASP8, CASP7, FAS
21	3	3	3	COL3A1, COL1A2, PCOLCE
22	3	3	3	WNT4, SOX9, FOXL2
23	3	3	3	THBD, F7, F10
24	3	3	3	SOAT2, CYP27A1, SOAT1
