# Supplementary material for: A Multi-Scale Bioinformatics Study on Novel Mechanism of Xintong Granule for Treating Coronary Heart Disease by Network Pharmacology and Molecular Docking Verification
Source: Research Square preprint supplement (doi:10.21203/rs.3.rs-116130/v1), 2020-12-01
Supplement: Supplementary file 6 [file d9cfcd6febce54351456db9e.xlsx]

## Sheet: Table S3
Supplementary Table 3 The information of XTG/CHD PPI
Node1	Node2
JUN	FOS
E2F2	RB1
MAPK8	JUN
CCNA2	CDK2
NCOA2	AR
POLD1	POLE
F7	F3
AKT1	NOS3
SERPINE1	PLAT
FAS	FADD
CCND2	CDK4
COL1A2	COL1A1
EGFR	EGF
BAD	BCL2L1
BCL2L1	TP53
DHFR	TYMS
TNF	TNFRSF1B
EDN1	EDNRA
IKBKB	TNF
CCNA2	CDKN1B
KL	FGF23
CASP7	CASP8
INS	INSR
CDKN2A	CDK4
TP53	MDM2
CDC25C	CCNB1
CDK4	CCND1
PLAU	SERPINE1
CDK2	CCND1
CDK2	CDKN1B
TNF	TNFRSF1A
NFKB1	NFKBIA
CASP8	BCL2L1
CASP8	CASP3
CDK2	CCNB1
E2F1	RB1
AKT1	GSK3B
RB1	CDK2
VEGFA	KDR
CCNA2	CDK4
CASP8	FADD
RB1	CDK4
CASP8	FAS
IKBKB	NFKBIA
RELA	NFKBIA
CCNA2	CCNB1
PTPN1	INSR
CCNB1	CDKN1B
NCOA2	NR3C1
BCL2L1	BAX
EGFR	STAT3
KCNJ11	ABCC8
THBD	F2
CHUK	NFKBIA
CACNB1	CACNA2D1
NCOA1	PPARG
POLD1	PCNA
NCOA2	PPARG
CTNNB1	GSK3B
IGFBP3	IGF1
CHEK1	CDC25C
KCNIP2	KCND3
IL1B	IL1A
RXRA	NCOA1
CDKN2A	TP53
MMP9	TIMP1
NRG1	ERBB3
PCNA	POLE
AKT1	CTNNB1
IL6	STAT3
CDK4	CDKN1B
APOA2	APOB
AKT1	INS
INSR	IGF1
KCNIP2	KCND2
OXTR	OXT
RXRA	PPARG
IL10	IL6
RXRA	NCOA2
CACNB1	CACNG1
CACNB2	CACNA1C
CYP1A1	AHR
TOP2A	TOP1
IKBKB	RELA
ESR1	NCOA1
TP53	CDK2
IL10	TNF
MTTP	APOB
PTEN	TP53
ERBB2	EGF
DNMT1	DNMT3A
IGF2	IGFBP3
CCND2	CDKN1B
IL6	IL4
LDLR	APOE
CACNA2D1	CACNG1
LDLR	APOB
BCL2	CASP8
TP53	SIRT1
ACACA	FASN
SOD1	CAT
MCL1	BAX
BIRC5	CCNB1
NFE2L2	HMOX1
JUN	MAPK1
VEGFA	HIF1A
IL10	IL1B
BRCA1	TP53
IL10	CXCL8
APOE	APOB
CDKN1B	CCND1
IKBKB	NFKB1
IL10	CCL2
CDK2	CCND2
IL10	STAT3
MAPK8	TP53
COL3A1	COL1A2
RELA	CHUK
CHEK1	TP53
JUN	MAPK14
CACNA2D1	CACNB2
ESR1	NCOA2
CDC25C	CCNA2
CACNB1	CACNA1D
CTNNB1	CCND1
KCNE2	KCNH2
ARRB1	ADRB2
AKT1	CDKN1B
APP	APOE
JUN	MAPK3
TNFRSF1B	TNFRSF1A
AREG	EGFR
BCL2	BAD
MYC	MED1
CAV1	NOS3
AKT1	CASP9
INS	IGF1
PCNA	CDK2
ADIPOQ	PPARG
NRG1	EGFR
VEGFA	STAT3
NCOA1	ESR2
MMP1	TIMP1
AKT1	TP53
COL3A1	COL1A1
TNF	VCAM1
AKT1	STAT3
CASP8	CASP9
NR1H4	NCOA1
AKT1	CREB1
F3	F2
EDN1	ECE1
FADD	TNFRSF1A
DLG4	GRIN1
AKT1	BCL2L1
CREB1	JUN
VEGFA	IGF1
STAT3	CCND1
CDKN2A	MDM2
CUBN	AMN
BCL2L1	STAT3
VEGFA	TGFB1
ADH1B	ALDH2
MYC	CDKN2A
PPARA	NCOA1
VEGFA	NOS3
KCNE2	KCNQ1
AKT1	BAD
VEGFA	EGF
CXCL8	IL4
LIG4	PRKDC
RB1	CCND1
NR1H4	RXRA
NRG1	ERBB2
LEP	STAT3
CXCL8	IL1B
MYC	JUN
MYC	AKT1
COL1A2	SPARC
CDKN2A	CCND1
F10	F3
AKT1	ERBB3
TNF	IL4
CACNB1	CACNA1C
DNMT1	RB1
TNF	NFKBIA
CAV1	EGFR
CDC25C	TP53
IGF1	EGF
FOS	MAPK1
RELA	NFKB1
TNF	IL13
MYC	CDK2
INS	EGF
AKT1	MDM2
IL4	CCL2
BCL2	BCL2L1
IL10	CXCL10
IKBKB	CHUK
IL1B	IL4
LEP	PPARG
BRCA1	CHEK1
JUN	TP53
MYC	CTNNB1
AKT1	ESR1
INS	PTPN1
PRKDC	TP53
CACNB2	CACNA1D
CREB1	FOS
DRD2	SLC6A3
AKT1	PTEN
ESR1	CCND1
CACNB1	CACNA1S
HSPB1	MAPK14
GSK3B	CCND1
CCNA2	TP53
CTNNB1	EGFR
TNF	RELA
TP53	MAPK14
MAPK8	FOS
MYC	STAT3
PNP	ADK
CTNNB1	ERBB2
RXRA	MED1
STAT1	IFNG
TNF	IL1B
MMP3	TIMP1
ERBB3	EGF
STAT3	MAPK1
CACNA1S	CACNB2
CASP3	MAPK14
APOB	CETP
CDK4	CCNB1
MYC	TERT
GPR55	CNR1
CASP8	TNFRSF1A
VEGFA	MMP9
E2F1	CCNA2
CXCL11	CXCL10
EGFR	ERBB3
FOS	STAT3
VDR	MED1
SUMO1	PML
NR1H4	MED1
NCOA1	NR3C1
CACNA1B	CACNB3
SHMT1	TYMS
PTPN1	EGFR
AKT1	PRKDC
IL6	IL13
TP53	SNAI1
AKT1	HIF1A
ARRB2	MAPK3
MMACHC	MTRR
FOS	MAPK3
CAT	GSR
CASP8	TP53
CXCL8	CXCL10
BRCA1	ESR1
CACNA2D1	CACNA1D
AKT1	PTPN1
IL13	VCAM1
MAPK3	MAPK1
CDKN2A	E2F1
RELA	CXCL8
CASP8	MAPK1
NCOA1	AR
CTNNB1	SOX9
CALCR	CALCA
TNF	JUN
SPARC	COL1A1
BRCA1	POLE
IKBKB	TNFRSF1A
HSF1	SIRT1
AR	CCND1
TNF	CASP8
TOP2A	CCNB1
HIF1A	STAT3
RB1	CCND2
TP53	RB1
MYC	MAPK1
STAT3	MAPK3
CTNNB1	TCF7
HSF1	HSP90AB1
TP53	STAT3
NOX1	NCF1
SNAI2	TP53
MAPK8	BCL2L1
IGFBP3	TP53
IL10	ICAM1
CHUK	NFKB1
JUN	CCND1
CDKN2A	RB1
APOA2	APOE
TP53	MAPK1
MCL1	STAT3
STAT1	EGFR
ESR1	NOS3
AKT1	TERT
CTNNB1	GSK3A
E2F1	CDK2
IL6	CXCL8
JUN	NR3C1
CREB1	MAPK14
BAX	TP53
AR	CTNNB1
TOP2A	CCNA2
FGFR2	FGF23
NOS1	DLG4
IL6	IL1B
HSD17B1	CYP19A1
MCL1	TP53
EGF	STAT3
BRCA1	POLD1
BCL2	TP53
SCN5A	ANK3
CNR1	DRD2
IL6	JUN
CACNA1D	CACNG1
PECAM1	KDR
TNF	MAPK14
SUMO1	TP53
TNF	NOS2
MAPK8	APP
PTGS2	PTGES
TNF	IL6
IL6	STAT1
CACNA2D1	CACNA1C
CCNA2	RB1
DHFR	SHMT1
RXRG	PPARG
LDLR	SREBF1
VEGFA	JUN
CNR1	OPRD1
IL6	RELA
CXCL8	STAT3
MYC	ESR1
CXCL8	IL13
CREB1	MAPK1
EDN1	EDN2
CTNNB1	CASP3
TNF	PPARG
STAT1	MAPK14
ADH1B	ADH1A
MYC	GSK3B
IL6	TIMP1
IL6	CCL2
RXRB	PPARG
NOS3	KDR
CRYZ	NFE2L2
NRG1	EGF
VEGFA	SERPINE1
ARRB1	MAPK1
TF	APOA2
GSK3B	TP53
MED1	PPARG
IL6	MAPK1
TP53	CDKN1B
IL6	FOS
ESR1	FOS
CACNB4	CACNA2D1
IL13	CCL2
TNF	FADD
ARRB2	ADRB2
CASP3	FADD
TNF	FOS
CACNA2D1	CACNB3
E2F2	CCNA2
MYC	CTCF
AREG	ERBB3
CACNB3	CACNA1C
STAT3	CCL2
MYC	DNMT3A
JUN	CTNNB1
MMP9	STAT3
AKT1	CAV1
IGF1	MAPK3
LEP	CRP
TGFB1	TIMP1
STAT3	IL4
PTPN1	LEP
IRF1	IFNG
VEGFA	IGF2
ARRB1	MAPK3
IL10	TNFRSF1B
PTGS2	STAT3
AR	SIRT1
MYC	PIM1
RELA	IRF1
RELA	JUN
AKT1	EDN1
MYC	MAPK3
CREB1	MAPK3
CXCL8	CCL2
CASP8	MAPK3
PCNA	TYMS
VEGFA	CTNNB1
SPP1	MMP7
TNF	ADAM17
GPR55	CNR2
BRCA1	CCNA2
TNF	CD40LG
PPARA	ACADM
VEGFA	MMP2
AKT1	RAF1
ADAM17	EGF
IL10	TIMP1
EDN2	EDNRA
ESR1	JUN
AKT1	PIK3CG
SERPINE1	TGFB1
ESR1	MAPK3
TOP2B	TOP1
MAPK8	WNT5A
PCNA	POLB
ESR1	TFAP2C
STAT3	MMP2
VEGFA	EGFR
SPP1	TIMP1
JUN	CCL2
RELA	IL2
CTNNB1	EGF
JUN	GSK3B
FOS	MAPK14
MAPK8	BAD
EGF	SERPINE1
AREG	ERBB2
MET	STAT3
GC	CUBN
AKT1	IL2
NR1H4	RXRB
CDC25C	CDK2
IL13	STAT3
IL1B	MAPK14
ALOX5	LTA4H
MAPK8	ERBB2
IL6	SPP1
COL3A1	PCOLCE
BCL2L1	MAPK1
PCNA	CDK4
HIF1A	TP53
JUN	HMOX1
MAPK14	NFKBIA
AR	HSP90AB1
BAD	RAF1
TERT	TP53
E2F1	CDK4
IL1B	NFKB1
E2F2	CDK4
TNF	STAT3
IL6	MAPK3
INS	CAV1
MYC	TNF
AKT1	HSP90AB1
INS	LEP
TP53	PML
COL1A2	PCOLCE
CTNNB1	MET
MMP2	TIMP1
ESR1	MED1
UGT1A1	CYP3A4
CDKN2A	CCND2
CACNB4	CACNG1
ADIPOQ	LEP
PPARG	SIRT1
ALOX5	PTGS2
BRCA1	CDK2
MAPK8	IL2
AKT1	CHUK
TNF	IFNG
ICAM1	STAT3
CXCL8	MAPK14
CACNA1S	CACNA2D1
VDR	NCOA1
SUMO1	MDM2
AKT1	IKBKB
CYP2E1	ADH1B
CAT	DAO
E2F2	CDK2
SERPINE1	TIMP1
PTGS2	IL1B
EGF	TIMP1
PPARG	TP53
CYP2E1	ADH1C
ALDH7A1	CHDH
VEGFA	TIMP1
CYP2E1	ALDH2
CHUK	PRKCB
PECAM1	ITGB3
HIF1A	EGFR
CAV1	EGF
APOB	APOH
NRXN1	DLG4
CDKN2A	CDKN1B
ADH1C	ADH1B
TNF	CXCL8
HSP90AB1	AHR
E2F1	CCND1
EGF	WNT5A
IL10	IL1A
ITGB3	KDR
SLC2A4	PPARG
ALOX5	PTGS1
TNF	STAT1
IL10	IL4
SPP1	MMP3
AKR1C3	SRD5A1
STAT1	IRF1
MAPK14	HMOX1
CYP17A1	SRD5A1
CXCL10	STAT3
ARRB2	MAPK1
CDH8	CTNNB1
CASP9	CASP3
IL13	IL1B
TNF	CHUK
STAT1	MAPK3
MYC	RELA
STAT1	MAPK1
IL1A	IL4
IL6	ERBB2
IKBKB	PRKCB
FOS	NR3C1
RUNX2	MAPK1
NFE2L2	JUN
STAT1	STAT3
NOS1	ATP2B4
RB1	MDM2
CTNNB1	TERT
PLA2G4A	MAPK14
PTEN	MDM2
CACNB4	CACNA1S
STAT3	TIMP1
JUN	CXCL8
AKT1	CAT
BRCA1	CDK4
ESR1	MAPK1
NCOA2	ESR2
TNF	CCL2
SUMO1	TOP1
JUN	IL2
IL13	IL4
CACNB4	CACNA1C
CHUK	TNFRSF1A
NRXN3	DLG4
EGFR	ERBB2
CASP9	BCL2L1
TP53	NR3C1
STAT3	MAPK14
COL1A1	PCOLCE
APOA2	APOH
VEGFA	CREB1
COL1A1	MMP2
E2F2	CCND1
E2F1	MDM2
CACNA1S	CACNG1
IGF1	SERPINE1
EDN1	MAPK1
PTPN1	CTNNB1
FOS	CCL2
FAS	TNFRSF1A
IL6	CRP
FAS	TP53
TOP1	CASP3
TNFRSF1B	ADAM17
PTGS1	PTGES
HIF1A	JUN
ESR1	IGF1
HIF1A	NOS3
KCNE1L	KCNQ1
CACNB3	CACNA1D
STAT3	IL2
INS	SLC2A4
IL6	APOE
PLA2G4A	MAPK3
IGF1	TGFB1
BCL2L1	MAPK3
MYC	TP53
AKT1	CASP3
FOS	TP53
RELA	SIRT1
HSP90AB1	NR3C1
ARRB1	ARRB2
ESR1	TERT
ELK1	FOS
RXRG	MED1
JUN	NFKBIA
CXCL11	CXCL8
PLA2G4A	MAPK1
AKT1	GSK3A
VEGFA	SPARC
MMP3	STAT3
CDK2	MDM2
CXCL10	CCR7
RELA	FOS
FGFR2	STAT3
EGFR	RASA1
CHEK1	MDM2
TNF	NFKB1
FOS	PPARG
RELA	CCND1
CASP3	RB1
AR	GSK3B
TF	C3
PTEN	EGFR
ESR2	MED1
ADIPOQ	INS
RXRB	MED1
JUN	SNAI1
ESR1	STAT1
CTNNB1	KDR
E2F1	CCNB1
RXRA	RXRG
ESR2	NOS3
BCL2	BAX
DHFR	GGH
INS	EGFR
FOS	CCND1
HIF1A	MDM2
CTNNB1	MMP7
PPARA	FADS1
VEGFA	AKT1
TP53	MAPK3
SUMO1	PCNA
CASP8	IL1B
RXRA	CTCF
MMP1	STAT3
PTPN1	MET
AKR1C3	CYP17A1
EDN1	MAPK14
IGFBP3	MMP2
PPARA	MED1
ESR1	HSP90AB1
NCOA1	MED1
CACNA1D	STX1A
AR	CASP8
MAPK8	NR3C1
PRKDC	CASP3
CNR2	OPRD1
MAPK3	RAF1
STAT3	IL1B
EGF	TGFB1
EGFR	MAPK1
POLD1	POLB
CYP19A1	SRD5A1
IGF2	EGF
ADRB2	CFTR
STAT1	IL2
VCAM1	IRF1
BIRC5	CCNA2
TNF	CAV1
MYC	BCL2
INS	APP
IL10	TNFRSF1A
HSF1	MAPK3
RAF1	MAPK1
CACNB4	CACNA1D
F7	F10
MYC	CCND1
SNAI2	JUN
CASP7	FADD
CYP2E1	PTGS2
ESR1	PGR
IL4	IL2
G6PD	GSR
EDN1	MAPK3
CTNNB1	GJA1
MMP9	MMP8
EGFR	TP53
RUNX2	SOX9
HIF1A	MAPK3
SUMO1	AR
STAT3	TGFB1
RB1	CDKN1B
E2F2	CCND2
BRCA1	SUMO1
AKT1	SOD1
IL6	FGF23
NCOA2	MED1
RELA	NR3C1
AR	RB1
DLG4	HOMER2
TRPV1	TRPA1
AR	MED1
JUN	IL1B
IKBKB	CASP8
IL6	NFKB1
SPARC	TGFB1
TP53	CCND1
CNR1	ADRA2A
EGFR	WNT5A
CREB1	GSK3B
CAV3	NOS3
CYP1A1	GSTM1
CYP3A4	NR1I2
CHEK1	CDK2
F2	APOH
ELK1	MAPK3
ERBB2	ERBB3
CDKN2A	E2F2
RELA	PPARG
ESR1	CYP19A1
APP	TGFB1
CYP19A1	SULT1E1
HTR1A	SLC6A4
BIRC5	STAT3
CREB1	EDN1
IL4	MAPK14
AKT1	NFKB1
ESR1	MAPK14
IGF1	MAPK1
TH	TYR
CYP2E1	ADH1A
STAT1	IL13
NCOA1	NR1I2
STAT1	TNFRSF1A
CHUK	CASP8
IL13	IL1A
KCNE1L	KCNH2
HSF1	MAPK1
APOA2	C3
NCOA2	PPARA
NFKBIA	MAPK1
ADRA2C	CNR1
ITGB3	SPP1
MAPK3	NFKBIA
DLG4	MDM2
MMP9	MMP1
NR3C1	MAPK1
SPP1	FGF23
ARRB1	EGFR
EDN1	ADRA1B
E2F1	CDKN1B
THBD	F10
CCNA2	MDM2
AKT1	IGF1
RELA	TNFRSF1A
SUMO1	NFKBIA
TNF	ICAM1
JUN	RB1
GSTM1	GSTM2
SCN1A	ANK3
IGF1	MMP2
ITGB3	AKT1
ESR1	CTSD
CACNB1	CACNB2
RASA1	EGF
RELA	IFNG
ALDH2	CAT
PPARA	NFKBIA
IL6	IL2
IGFBP3	MMP1
PRKCA	EGFR
MMP9	MMP3
APOE	C3
VEGFA	IL6
HIF1A	CDKN2A
WNT4	WNT5A
PCNA	CCND1
CACNA1S	CACNB3
E2F2	CDKN1B
PPARG	NFKB1
CES1	CYP3A4
NOS2	CAT
PTGS2	CXCL8
ADRA1D	EDN1
ADRA1A	EDN1
PML	MDM2
RXRA	PPARA
IL6	C3
E2F2	E2F1
TERT	IL2
CACNB2	CACNG1
EDN1	ADRB2
CASP8	APP
DNMT1	TP53
CXCL8	CCR7
CTNNB1	TGFB1
CXCL8	NFKB1
NCOA2	NCOA1
HSF1	SUMO1
TNF	IL2
ESR1	HSPB1
IL6	APOB
F2	PLAT
RUNX2	MAPK3
MYC	PML
IL6	APP
PGR	MAPK1
CHRNA3	CHRNB4
PPARA	ABCA1
PRKCA	NFKBIA
NR3C1	NFKB1
IL10	IL2
AKT1	HSPB1
DPYD	PNP
BIRC5	TP53
PPARA	MAPK3
RUNX2	RB1
SUMO1	NR3C1
JUN	NOS2
HSD17B1	SULT1E1
JUN	PPARG
EDN1	EGF
MYC	TFAP2C
VEGFA	ERBB2
TNF	NR3C1
HIF1A	NCOA1
CXCL11	CCR7
AKT1	RB1
EDN1	JUN
SHMT1	DLD
NOS2	STAT3
G6PD	HK2
MAPK3	IL2
TOP2A	SUMO1
TF	APOB
RXRA	PPARD
VDR	RXRA
TERT	MAPK1
TCN1	MMP8
APP	MAPK3
NFKBIA	TNFRSF1A
CACNA1C	CACNG1
JUN	IRF1
VEGFA	CXCL8
MMP3	EGFR
SREBF1	FASN
MAPK3	TGFB1
POLE	POLB
PGR	ERBB2
IL2	MAPK1
FDPS	FNTA
CYP1B1	HSD17B1
SELE	ICAM1
CD36	PPARG
MTTP	APOA2
NFKB1	MAPK1
CXCL8	C3
ADRA1B	OXT
CAV1	INSR
RELA	IL1B
CAV1	TGFB1
STAT1	FADD
IL10	IL13
E2F1	CCND2
RB1	MAPK1
JUN	IL4
STAT3	TNFRSF1A
NCOA1	PGR
NOS2	NFKBIA
AKT1	E2F1
MAPK8	EDN1
MMP1	MMP3
PML	SIRT1
DNMT1	E2F1
E2F1	TYMS
HSP90AB1	MAPK3
ADRA1D	OXT
TRIM24	STAT3
RELA	CASP8
ESR2	FOS
IL6	ICAM1
ADRA1A	OXT
ADORA3	ADRA2A
IGF1	TIMP1
IL6	IGFBP3
IGF1	RAF1
CHEK1	CCNB1
IGF2	INSR
ARRB2	NFKBIA
STAT1	EGF
RB1	SIRT1
CHEK1	CCNA2
EPHB2	RASA1
HSD17B1	CYP1A1
LIG4	POLD1
EPHB2	MMP2
CYP1A2	CYP3A4
CYP2E1	ADH7
SLC6A3	STX1A
CASP7	FAS
BCL2	MAPK8
HSP90AB1	CDK4
CYP19A1	AKR1C3
CACNB2	CACNB3
MCL1	BCL2L1
RELA	MAPK1
RB1	RAF1
OLR1	APOB
ADORA3	CNR1
NFKB1	TNFRSF1A
FDPS	HMGCR
ICAM1	IRF1
NQO1	HMOX1
DHFR	E2F1
ADIPOQ	CRP
PLAU	F2
PIM1	STAT3
JUN	NOS3
RELA	MAPK8
PLAU	EGFR
MAPK8	ERBB3
MAPK8	BAX
TNF	PPARA
PTPN1	EGF
RELA	NOS2
CD36	PPARA
HSP90AB1	NOS3
C3	MPO
TNFRSF1B	CD40LG
DHRS3	ALDH1A2
STAT1	CXCL10
EGFR	TFAP2C
PPARA	MAPK1
XDH	PNP
CNR2	DRD2
ADORA3	OPRD1
C3	APOB
CASP8	NFKB1
CYP1A1	CYP3A4
APP	MAPK1
TOP2A	BIRC5
PTPN1	CAV1
ITGB3	MAPK3
RASA1	MAPK3
MAPK3	NFKB1
PGR	MAPK3
PPARA	RXRB
ELK1	MAPK1
ARRB2	EGFR
IGF1	APP
RELA	MAPK3
ARRB2	RAF1
EDN1	MMP9
PPARA	APOA2
ADAM17	ERBB2
IL1B	CCL2
ITGB3	COL1A2
OPRM1	ADORA3
MMP9	MMP7
EDN1	F2
LYZ	MPO
HTR2A	OXT
CAV1	TNFRSF1A
HSF1	GSK3B
NRG1	ADAM17
MYC	MAPK14
IGF2	CTNNB1
IGFBP3	TIMP1
JUN	TGFB1
JUN	IFNG
CYP19A1	CYP17A1
APP	EGF
CTNNB1	IGF1
PECAM1	CTNNB1
NRG1	MAPK3
SPP1	APOE
COL1A2	MMP2
ADORA3	OPRK1
VCAM1	STAT3
ADRB3	CALCA
TOP2A	CHEK1
EDN1	EGFR
ARRB1	CHRM1
IGF2	INS
PPARG	TGFB1
PCNA	TP53
MAPK14	NFKB1
ESR1	TP53
BCL2	MCL1
RELA	MAPK14
BCL2L1	AIFM1
AKT1	INSR
FGF23	CYP27B1
CASP7	CASP9
RXRB	PPARD
ADRB1	CALCA
MAPK8	MAPK3
SUMO1	FOXL2
MAPK8	CD40LG
GPR55	HTR1A
BCL2	MAPK3
EPHB2	MMP9
PPARA	RXRG
SPARC	TIMP1
AKT1	CD40LG
ITGB3	SERPINE1
BAD	CASP3
EDN1	OXT
ACACA	PRKAB1
ARRB1	ADRA1B
NCOA1	SUMO1
IL6	INS
IL1A	NFKB1
PPARA	RELA
SUMO1	NR3C2
NCOA2	CTNNB1
TOP2B	SUMO1
ESR1	ERBB2
POLD1	PRKDC
CALCA	ADRB2
MAPK8	MAPK1
PRKCA	RAF1
APOA2	PON1
NCOA2	SUMO1
STAT1	VCAM1
SCN5A	SCN10A
IL10	IFNG
EDN1	MMP2
LDLR	WNT5A
IGF2	TGFB1
EGF	SPARC
CYP2E1	CYP3A4
ADIPOQ	IL6
CREB1	HMOX1
ANXA1	CXCL8
ITGB3	TGFB1
ADH1C	ALDH2
CYP2R1	CYP24A1
HSP90AB1	PGR
PTGS2	PLA2G4A
MAGI2	CTNNB1
FOS	HMOX1
CYP2R1	CYP27B1
NRG1	DLG4
RASA1	RAF1
EGFR	MAPK3
IL6	IL1A
RXRG	PPARD
CDKN2A	CTCF
IL6	PTGS2
ALOX5	IL13
MAOB	MAOA
CREB1	NOS3
ADRA1D	EDN2
NR1H4	RXRG
INS	PPARG
AR	MAPK14
MMP1	IGF1
BCL2	MAPK1
PRKCA	EGF
IGF2	MMP2
INS	STX1A
HIF1A	EDN1
PRKCB	EGFR
RELA	CD40LG
SPARC	MMP2
ERBB2	TP53
AR	NR3C2
PAH	DHFR
IL4	HMOX1
PNP	NT5C2
ALOX5	IL4
PML	RB1
MAPK8	AR
OPRM1	OPRD1
PCNA	DNMT1
RASA1	MAPK1
TRPV1	CNR1
PRKDC	MDM2
MYC	SNW1
AR	NR3C1
AKT1	SIRT1
TNF	MMP9
TGFB1	MAPK1
PRKCA	TERT
MAPK3	NR3C1
APOE	TIMP1
MMP9	CTSD
MPO	MAPK1
NOS1	AKT1
HTR1B	HTR1A
CTNNB1	RAPGEF2
TNF	IL1A
IGFBP3	F2
F2	APP
CASP3	TP53
NR3C2	NR3C1
ESR1	EGFR
VEGFA	APP
IL6	LEP
ADRB2	APOB
MAPK8	MAPK14
TOP2A	TYMS
ELK1	MAPK14
CACNB3	CACNG1
HIF1A	CREB1
CYP3A4	SULT1E1
AKT1	CCND1
ABCC1	ABCG2
VCAM1	NCF1
CYP1B1	AHR
PRKCA	MAPK3
GSK3B	NR3C1
CYP1A1	SULT1E1
DPYD	TYMS
RB1	MAPK14
MYC	NFKBIA
TERT	RB1
HSP90AB1	MAPK1
SPP1	RUNX2
RELA	IL4
LDLR	EGFR
CTNNB1	MMP3
ARRB2	WNT5A
CACNA1C	STX1A
CTNNB1	FOS
PRKCA	NFE2L2
MAOA	ALDH2
LDLR	APOA2
ARRB2	OPRM1
NCOA1	RXRB
CD36	APOB
APOE	CETP
PRKCA	NFKB1
PRKCA	PPP3CA
INS	DPP4
CHUK	FADD
FOS	TGFB1
ARRB1	OPRM1
AKT1	BCL2
HSP90AB1	ATP5B
EDN2	ADRA1B
PRKCA	CHUK
RXRA	MAPK1
NFE2L2	NQO1
EDN1	NOS3
CXCL10	CCL2
MAPK14	IL2
PRKCA	MAPK1
JUN	IL1A
FOS	IL1A
IGF1	SPARC
ITGB3	PTPN1
PPARG	RB1
IRX5	KCND2
ESR1	ESR2
VEGFA	ITGB3
CYP19A1	CYP1A1
G6PD	TP53
MMP1	MMP7
TNFRSF1B	STAT3
HTR2C	OXT
DHRS3	RBP1
HSP90AB1	NR3C2
PTGS1	MPO
F2	MAPK3
PCNA	E2F1
VCAM1	CCL2
CACNB4	CACNB3
CNR2	HTR1A
ADIPOQ	NR3C1
IKBKB	FADD
NFE2L2	FOS
ERBB2	TFAP2C
CHEK1	TYMS
RB1	MAPK3
VCAM1	ICAM1
MAPK3	MAPK14
VDR	RXRB
VDR	RXRG
ADRB3	ADRB2
RELA	CCL2
ADRA1A	ADRA1B
EDNRA	EGFR
IL6	IFNG
HSP90AB1	HSPA5
IL13	HMOX1
SLPI	LYZ
ADORA3	CXCL8
PTPN1	IGF1
STAT1	NR3C1
IKBKB	PRKCA
VKORC1	NQO1
ARRB1	RAF1
OPRM1	CNR1
RXRA	MAPK3
IFNG	IL2
BRCA1	PCNA
MAGI2	RAPGEF2
INS	IGFBP3
RELA	APP
SHH	SOX9
GJA1	MAPK3
C1R	CRP
OPRK1	OPRD1
MED1	SNW1
F10	F2
AKT1	EDNRA
CD40LG	NFKB1
PPARA	JUN
MAOA	ADH1B
APP	C3
ADORA1	CXCL8
HTR1D	HTR1A
CREB1	NFE2L2
INS	CACNA1C
PCNA	CCNB1
F2	IGF1
CNR1	OPRK1
SREBF1	SIRT1
NR1H4	NCOA2
TF	APOE
CASP3	BCL2L1
PRKCA	PRKCB
MAPK3	FGF23
MTNR1A	MTNR1B
DNMT3A	CCND1
CYP19A1	CYP3A4
PPARA	CYP1A1
SHMT1	DAO
ANXA1	NR3C1
ADRB2	EGFR
CRYZ	JUN
NT5C2	ADK
IL13	IL2
EDN1	HTR2B
RXRA	ABCA1
CD36	OLR1
ITGB3	COL1A1
BIRC5	RASA1
LYZ	C3
EGFR	CFTR
CCNB1	CCND1
CYP1B1	CYP1A1
MET	MAPK3
NOS1	PRKCA
INS	SREBF1
NT5C2	IMPDH2
NQO1	ADK
SREBF1	CASP3
CYP17A1	CYP3A4
TERT	MAPK3
MAPK8	NFKB1
LYZ	MMP8
CASP7	CASP3
SPP1	IGFBP3
EGF	CFTR
CXCL8	APP
MAOB	ALDH2
ADRA2C	CNR2
SCN10A	ANK3
NR3C1	MAPK14
IGF2	TIMP1
SPARC	SERPINE1
DHRS3	RETSAT
ARRB1	HTR2C
STAT1	TRIM24
NCOA2	RXRB
ARRB1	EGF
SUMO1	CDK2
HTR1D	HTR1B
SCN5A	KCNH2
CDK2	MAPK3
HIF1A	NR3C1
PPARD	MED1
CDK2	MAPK1
CYP1B1	AKR1C3
CNR1	HTR1A
AKT1	EGF
NRXN1	STX1A
ADRA2B	CNR2
EGF	APOB
TNF	SELE
CTNNB1	MAPK14
TF	IGFBP3
MMP9	CXCL8
AKR1C3	SULT1E1
HTR2A	EDN1
OPRM1	DRD2
FGFR2	JUN
SELE	VCAM1
TERT	CDKN1B
MAOA	CYP3A4
MYC	PPARA
RELA	IL1A
AKT1	AR
CNR2	ADRA2A
STAT3	IL1A
INS	CACNA1D
CCND2	CCNB1
SHH	CCNB1
F2	MAPK1
CD40LG	NFKBIA
ITGB3	COL3A1
AKT1	MAPK14
HSD17B1	AKR1C3
C3	MAPK1
BCL2	STAT3
MAPK8	SIRT1
DRD2	APP
CXCL10	C3
IGF2	SERPINE1
CACNB1	CACNB3
DRD2	OPRD1
POLE	CDK2
DNMT3A	CDK4
NRG1	MAPK1
BAX	SIRT1
PRKCB	MAPK3
CYP2E1	CYP1A2
E2F2	DNMT1
ADRA1A	ADRA1D
ADRB1	ADRB2
ADRB2	PTGER2
DRD2	OPRK1
IGF2	APP
SPP1	C3
ACADM	GCDH
AKT1	RXRA
POR	CYP27B1
ADORA1	APP
CRYZ	NQO1
ICAM1	CCL2
AKT1	PML
IRF1	NR3C1
OPRM1	CNR2
MMP9	LYZ
CNR2	ADORA3
FGFR2	MAPK3
ADRA2B	OPRD1
MMP9	LTA4H
ITGB3	PLAU
MET	MAPK1
ADRA1A	EDN2
BAD	MAPK3
VEGFA	MET
ADRA2A	OPRK1
PPARA	EDN1
ADRA2A	OPRD1
ADRA2B	OPRK1
TH	SLC6A3
HSD17B1	CYP3A4
PCNA	RB1
ANXA1	CAV3
ADRB2	EGF
CES1	MPO
CXCL8	ICAM1
NQO1	ODC1
CTNNB1	PPARD
ADRA2B	CNR1
IGF2	SPARC
KCNH2	KCNQ1
AKR1C3	CYP1A1
CYP2E1	CYP1A1
ARRB2	EGF
ADRA2C	OPRK1
NRXN1	HOMER2
TXNRD1	NCOA2
ADRA2C	OPRD1
ANXA1	C3
PTGER4	PTGER2
HTR3A	HTR1A
APP	APOB
ADRA2B	OPRM1
ESR1	SUMO1
VDR	RUNX2
HTR1A	OPRK1
PRKCB	MAPK1
CNR1	APP
OPRM1	ADRA2C
TRIM24	RAF1
MMP8	LTA4H
ADORA1	DRD2
CD40LG	MAPK14
DHFR	TPH1
OPRM1	ADRA2A
CNR2	OPRK1
CYP2E1	GSTM1
VDR	CYP27B1
CCNA2	CCND2
EDNRA	EGF
CHRM2	CNR1
STAT1	GSK3B
MYC	RXRA
APP	OPRD1
CDK2	CDK4
NOS1	GATM
FGFR2	MAPK1
MAPK8	IGFBP3
ITGB3	MAPK1
CDKN2A	SUMO1
OPRM1	HTR1A
NCOA2	SIRT1
IL6	APOA2
OPRM1	CXCL8
ADRA2C	ADORA1
APP	TIMP1
B4GALT1	GLB1
CALCA	PTGER4
CNR1	CXCL8
GPR55	ADORA3
ADORA3	DRD2
CAV1	GSK3B
TNF	PTGS2
F2	OXT
AR	PTEN
GATM	SHMT1
ARRB2	MAPK14
ICAM1	IL1B
IVD	DLD
EDN1	APP
SLPI	MMP8
ESR1	NR3C1
ESR1	BCL2
GSK3B	CDK4
CYP27B1	CYP24A1
POR	CYP2R1
NRG1	MAPK8
CNR1	ADORA1
MAOB	CYP3A4
HTR1A	APP
RXRA	ACADM
IGF2	MMP1
TERT	SULT1E1
LDLR	CFTR
MGAM	PYGM
ANXA1	IL4
AKR1C3	CYP3A4
GPR55	ADORA1
FGFR2	FOS
DHFR	TH
GJA1	MAPK1
CYP2E1	CES1
SUMO1	CCNA2
PGR	MED1
AKT1	SLC2A4
NRXN3	STX1A
APOB	CFTR
GATM	NOS3
SUMO1	PGR
SUMO1	PRKDC
HTR1A	OPRD1
EDN2	HTR2B
HRH1	EDN1
TH	GOT1
ITGB3	IGF1
PAH	GOT1
ENPP1	ADK
HTR2A	CHRM1
SUMO1	PPARG
ABCA1	RXRB
PRKCB	EGF
IL6	MMP9
GPER1	HTR1A
EDN1	OXTR
CALCA	ADORA2B
ADORA1	OPRD1
ACADS	GCDH
ADORA1	ADRA2A
RXRA	NR3C1
FAS	HSPB1
MMP3	MMP2
SUMO1	DNMT1
APOA2	CETP
TERT	IRF1
PRKCA	ADRA2C
ARRB1	WNT5A
ARRB2	RELA
RXRA	MAPK8
MAPK8	MET
RXRA	LEP
ALDH1B1	MAOA
ELK1	JUN
EGFR	APOB
ARRB1	EDN1
HTR2A	HRH1
IGF2	F2
ADRA2B	ADORA3
ADORA3	APP
ANXA1	APP
NCOA1	CYP1A1
TH	MAPK14
RXRA	SUMO1
ADRA2C	ADORA3
ADORA3	MTNR1A
BAD	MAPK1
HTR2A	APP
AGRN	APOE
MMP9	CTRB1
PPARA	NOS2
HTR2B	OXT
RXRA	CYP1A1
SUMO1	BIRC5
RETSAT	ADH1A
TP53	HSPB1
MAOB	ALDH1B1
INS	CRP
CHRM2	OPRK1
MMP1	MMP2
FGFR2	STAT1
RXRA	ADIPOQ
CYP2E1	PTGS1
CRYZ	FOS
IGF2	IGF1
RELA	RAF1
ACAD8	DLD
ADRA1A	EDNRA
CYP2E1	CYP17A1
CXCL10	APP
C3	TIMP1
CHRM1	HTR2C
CREB1	BCL2
KDR	MAPK14
ADRA2B	ADORA1
HTR2A	ADRA1D
ADORA1	OPRK1
F2	CFTR
ABCA1	APOE
IL6	EGFR
CXCL8	OPRK1
GPR55	DRD2
IGFBP3	APOB
DRD5	ADORA2B
NCOA2	RXRG
APP	SERPINE1
PTEN	PML
HSP90AB1	ESR2
RELA	TGFB1
PCNA	CCNA2
CNR2	CXCL8
CXCL8	OPRD1
CYP1A1	CYP17A1
IL4	IFNG
NOS1	PPP3CA
JUN	STAT3
DRD1	MC4R
ADRA1D	EDNRA
HTR2A	ADRA1B
INS	ANK3
DRD1	ADORA2B
EDN1	RAF1
PRKCA	ADRA2A
MAPK8	EDNRA
DRD2	HTR1A
FGF23	MAPK1
BCL2	AIFM1
LDLR	EGF
NCOA2	CYP1A1
IGFBP3	APOE
LEP	IGF1
ADRA2B	PRKCA
CYP17A1	CYP1A2
ACHE	CHKA
CALCR	DRD5
CXCL11	IFNG
ADORA2B	PTGER4
PRKCA	WNT5A
OPRM1	ADORA1
HTR1B	CNR1
HRH1	HTR2C
MAPK8	PRKCB
ADRA1B	APP
ADRA2A	MTNR1B
COL1A2	IL4
ESR1	PCNA
LEP	PRKAB1
PPARG	TNFRSF1A
CHUK	IL1A
EDNRA	APP
ADORA2B	PTGER2
CD40LG	PIK3CG
ADORA3	ADORA1
PML	TGFB1
GATM	ALDH1B1
CHRM2	ADRB2
AR	PGR
RASA1	DAB2IP
OPRM1	HTR1B
DRD1	CALCA
HRH1	ADRA1B
LDLR	ADRB2
APP	HTR2C
MMP9	MMP13
CHRM3	OXT
ABCA1	MED1
PPARG	SNAI1
CNR2	MTNR1A
HRH1	HTR2B
HTR1A	ADRA2A
EDNRA	ADRA1B
SPP1	APOB
PRKCB	IL2
RAF1	NFKB1
PML	IRF1
CHRM2	DRD2
ADRA2C	DRD2
IKBKB	FAS
HTR1B	OPRK1
APP	SPARC
VEGFA	TNF
INS	CACNB3
MYC	PTEN
HTR2A	ADRA1A
VEGFA	INS
MAPK8	RASA1
NCOA1	ABCA1
ADIPOQ	MED1
PRKCB	NFKBIA
APOB	TIMP1
TNF	ADIPOQ
VEGFA	TP53
HTR1D	OPRD1
CHRM2	OPRM1
TERT	IFNG
ADRB2	WNT5A
RXRA	SLC2A4
APOA2	APP
HTR2A	EDN2
CASP8	COL3A1
RELA	PRKCB
ADRA1D	CHRM3
ERBB2	STAT3
NCOA1	ESRRG
ADRA2B	GPR55
HRH1	ADRA1A
VEGFA	PTGS2
ARRB1	CXCL8
HTR1B	OPRD1
MYC	NOS2
NRXN3	NRXN1
ADRA2B	CXCL8
SNAI2	PPARG
TF	IL6
CALCA	MC4R
CYP19A1	FOXL2
ADRA1D	HTR2C
CHRM2	OPRD1
SPP1	APP
MMP8	CTSD
ADORA1	HTR1A
PRKCA	RELA
CHUK	FAS
OPRM1	STAT3
RXRA	TNF
CALCA	DRD5
BAD	AIFM1
RXRA	NR1I2
INS	CACNB2
HRH1	EDNRA
CALCR	MC4R
GPR55	MTNR1A
NOS3	SIRT1
ADORA3	CXCL10
EGFR	CCND1
AKT1	RBP1
CXCL8	ADRA2A
LEP	MED1
APP	OXT
HRH1	ADRA1D
HTR1D	OPRK1
APP	NFKB1
ADRB1	PTGER2
CTRB1	MMP3
TP53	PRKAB1
GPR55	ADRA2A
DRD5	MC4R
PAH	TYR
ADRA2C	CXCL8
ESRRG	MED1
LYZ	CTSD
CTNNB1	MED1
ADRA2C	GPR55
ANXA1	IL13
ADRA2B	HTR1A
ADAM17	SHH
PAWR	NFKBIA
VDR	CYP24A1
TERT	NFKB1
ITGB3	CASP8
TH	TPO
CALCA	APP
CCR7	C3
HIF1A	MAPK1
ADRB2	PTGER4
INS	SERPINE1
ADRA1A	HTR2C
CHRM2	CNR2
MMP9	PRSS1
ADRA1D	CHRM1
EDN1	CFTR
ADRB1	DRD5
HTR2A	OXTR
ADRB3	MC4R
CALCR	ADRB2
IL13	COL1A2
OPRM1	GPR55
NRXN3	HOMER2
ADORA3	MTNR1B
NCOA1	LEP
HRH1	OXTR
ADH1C	ADH1A
LYZ	NFKB1
HTR2C	CHRM3
CTNNB1	CA2
ADRA1D	HTR2B
IGFBP3	APOA2
ADRB2	HTR2C
CTCF	CDKN1B
PECAM1	APOB
CNR2	APP
TNF	INS
OPRM1	APP
ADRA1B	CHRM1
ADRA2B	DRD2
EDNRA	OXT
EDN1	HTR2C
ADRA1A	HTR2B
SLC2A4	MED1
IGFBP3	APP
GPER1	CXCL8
EDN2	APP
LYZ	MAPK1
NFKB1	SIRT1
ELK1	PRKCA
G6PD	CAT
APP	CCR7
GPR55	OPRK1
HTR1D	ADORA1
CNR2	MTNR1B
GPR55	OPRD1
ESR2	MAPK1
HTR1B	DRD2
MET	ERBB3
DRD2	ADRA2A
ADRA1B	HTR2B
SUMO1	DNMT3A
OPRM1	HTR1D
HTR1A	CXCL8
OPRM1	C3
ADORA3	HTR1A
PTGS2	TP53
CASP8	COL1A2
APP	LYZ
CASP8	COL1A1
SNW1	CCND1
ADRA1B	HTR2C
ADRA1A	CHRM3
SLPI	CTSD
IGFBP3	C3
MYC	FOS
RXRA	NFKBIA
APOB	PON1
CRYZ	CREB1
PRKCB	WNT5A
NCF1	MAPK14
TPO	TYR
CACNB3	STX1A
ADRB3	ADORA2B
CHRM2	HTR1B
ADRB2	MC4R
VEGFA	CCL2
NR3C2	PGR
CD40LG	IL4
GATM	NOS2
TF	EGF
DRD1	ADRB3
ADRA1B	CHRM3
DRD2	MTNR1B
ADRA2C	HTR1A
APOE	PON1
ADRB1	ADORA2B
PRKCB	RASA1
CHRM1	APP
INS	NOS3
CD36	IL4
LDLR	ARRB1
GSTP1	GGH
ADRB3	DRD5
ACACA	BRCA1
ADRA2B	HTR1B
HTR2A	CHRM3
DRD2	CXCL8
GABRG3	GABRA1
CYP2E1	ALOX5
DRD5	ADRB2
ADRB2	ADORA2B
SLPI	TCN1
ADRA2C	HTR1B
ADH1C	RETSAT
SLC6A4	TPH1
MMP9	IL1B
CHRM1	ADRB2
LYZ	LTA4H
DRD2	MTNR1A
EDN1	ANXA1
ADRB1	CALCR
APP	ADRA2A
HTR1A	MTNR1A
HTR1B	ADRA2A
CYP1A1	ALDH1A2
DRD1	ADRB1
AKR1C3	CYP1A2
ADORA1	CXCL10
AKT1	JUN
PON1	CETP
BAX	AIFM1
CALCR	ADORA2B
HTR1D	DRD2
CHRM2	HTR1D
EDN2	OXTR
APOE	FGF23
TNFRSF1B	PLAU
AKT1	RXRB
ADRA1D	ADRA1B
EDN2	HTR2C
CHRM2	ADRA2A
GPER1	CNR1
HTR1D	CNR1
PGR	NR3C1
ADRA2B	APP
CXCL11	C3
ADRA2C	APP
PRKCB	RAF1
CHRM2	APP
ADRA2B	CHRM2
OXTR	CHRM3
MCL1	CASP3
OXTR	EDNRA
CYP3A4	ALDH1A2
CHRM1	OXT
ADORA1	MTNR1A
APOB	MAPK14
STAT3	OPRD1
ADRA1A	CHRM1
TCF7	TERT
GOT1	ASPA
HRH1	OXT
OPRM1	GPER1
MMP13	MMP2
CHRM2	EGF
DRD1	ADRB2
DRD1	DRD5
CHRM2	ADRA2C
ANXA1	CXCL10
APP	OPRK1
ANXA1	F2
ADRA2B	PRKCB
TF	SPP1
ADRA1D	APP
HTR1B	ADORA3
ARRB2	CXCL8
APOB	RBP1
PRKCA	MMP3
ARRB1	CXCL10
ADRA1D	OXTR
CHRM1	HTR2B
HTR1B	ADORA1
ADIPOQ	NCOA1
HTR1A	MTNR1B
CNR2	ADORA1
OXTR	ADRA1B
CHRM1	CHRM3
HTR1D	ADORA3
HRH1	CHRM3
CYP1A1	MED1
GPR55	CCR7
EDNRA	HTR2B
CACNB2	STX1A
CACNB4	CACNA1B
TF	APP
CHRM2	HTR1A
ADRA1A	OXTR
STAT1	ERBB2
FGF23	APOB
NCOA1	FOS
OPRM1	CXCL10
MMP7	MMP2
CNR1	CXCL10
HRH1	CHRM1
ADRA2C	MTNR1A
OXTR	HTR2C
MMP3	MMP7
HTR2A	HTR2C
F2	ADRB2
NOS1	PRKCB
CNR2	CCR7
ADRA2B	HTR1D
MTNR1A	ADRA2A
PRKCA	RASA1
ALDH7A1	GATM
TNF	MAPK8
DNM3	EGFR
TRIM24	MAPK1
MMP3	MMP13
ADRA2C	HTR1D
JUN	APOA2
APP	MTNR1B
IL4I1	MAOB
ARRB1	CHRM2
TF	EGFR
IL4I1	MAOA
GATM	DAO
ADRA1B	ADRB2
NCOA1	SLC2A4
GGH	TCN1
MYC	SIRT1
NOS1	GRIN1
ADRA2B	MTNR1A
GPER1	ADRA2A
NCOA1	RXRG
DRD1	CALCR
CNR2	CXCL10
CXCL8	CRP
ALDH2	ADH1A
MMP1	PRSS1
MYC	CDK4
TXNRD1	RXRA
MTNR1A	APP
MMP1	MMP13
MTNR1A	OPRK1
FCER1A	FOS
ADRA1A	APP
HTR1D	ADRA2A
IL4I1	TYR
GATM	ALDH2
ADRA2C	MTNR1B
GPER1	DRD2
APP	CHRM3
GPER1	OPRK1
PRKCB	NCF1
MTNR1A	OPRD1
LDLR	ARRB2
ADRA2B	MTNR1B
RXRA	NOS2
AKT1	NOS2
DNM3	WNT5A
PPARA	SUMO1
NCOA1	JUN
PPARA	RB1
APOE	RBP1
GPER1	OPRD1
CYP1A1	UGT1A1
CNR2	CNR1
ANXA1	CXCL11
TXNRD1	PPARA
AREG	EGF
ADORA3	CCR7
GSTP1	CYP1A1
PPARA	F2
RXRA	FADS1
ANXA1	CCR7
F2	RAF1
PRSS1	MMP7
TNFRSF1B	OLR1
PPP3CA	SOD1
HTR2A	F2
CHRM2	GPR55
HTR2A	HTR2B
TRIM24	MAPK3
MED1	CTSD
DNM3	EGF
LYZ	GGH
CACNA1B	CACNB2
TF	TIMP1
CTSD	LTA4H
MTNR1B	OPRD1
OPRM1	MTNR1A
ADRB1	MC4R
ARRB1	CFTR
HTR2C	HTR2B
ADRA1D	F2
ESR1	MAPK8
MMP9	MMP2
GPR55	MTNR1B
RXRA	TOP2B
CTSD	NFKB1
CXCL8	MTNR1A
UGT1A1	CYP1A2
CNR1	MTNR1A
AKT1	RXRG
RXRA	PRKCA
CXCL8	MTNR1B
CYP2E1	AKR1C3
ADRA2C	PRKCB
OPRM1	MTNR1B
GSK3B	GSK3A
OPRK1	MTNR1B
ADORA1	MTNR1B
HTR1B	APP
GLB1	GGH
GPER1	MTNR1B
MMP13	MMP7
RXRB	MAPK1
EDNRA	CHRM3
ADRB3	PTGER4
IL4I1	TPO
HTR2A	SLC6A4
NCOA2	ABCA1
GGH	CTSD
AKT1	MAPK3
XDH	CYP1A2
HTR2B	CHRM3
RELA	PAWR
APOA2	TIMP1
OPRK1	C3
NFE2L2	PRKCB
[truncated: 1,957 more rows]
